# Supplementary material for: Discovery of a low affinity thyrotropin-releasing hormone (TRH)-like peptide that exhibits potent inhibition of scopolamine-induced memory impairment in mice
Source: Royal Society of Chemistry journal article supplement (doi:10.1039/c5ra06935a), 2015-01-01
Supplement: c5ra06935a1.pdf [file c5ra06935a1.pdf]

## Supporting Information

### **Discovery of a low affinity thyrotropin-releasing hormone (TRH)-like peptide that exhibits potent inhibition of scopolamine-induced memory impairment in mice**

Chhuttan L. Meena,<sup>†</sup> Shubdha Ingole,<sup>‡</sup> Avinash Thakur,<sup>‡</sup> Satyendra Rajpoot,<sup>‡</sup> Prajwal P. Nandeker,<sup>#</sup>  
Abhay T. Sangamwar,<sup>#</sup> Shyam S. Sharma,<sup>†</sup> and Rahul Jain<sup>†\*</sup>

<sup>†</sup>Department of Medicinal Chemistry, National Institute of Pharmaceutical Education and Research, Sector 67, S.A.S. Nagar, 160 062, Punjab, India

<sup>‡</sup>Department of Pharmacology and Toxicology, National Institute of Pharmaceutical Education and Research, Sector 67, S.A.S. Nagar, 160 062, Punjab, India

<sup>#</sup>Department of Pharmacoinformatics, National Institute of Pharmaceutical Education and Research, Sector 67, S.A.S. Nagar, 160 062, Punjab, India

## CONTENTS

- S1. <sup>1</sup>H-NMR spectrum of 6a
- S2. <sup>13</sup>C-NMR spectrum of 6a
- S3. HPLC chromatogram of 6a
- S4. <sup>1</sup>H-NMR spectrum of 6b
- S5. <sup>13</sup>C-NMR Spectrum of 6b
- S6. HPLC chromatogram of 6b
- S7. <sup>1</sup>H-NMR spectrum of 6c
- S8. <sup>13</sup>C-NMR spectrum of 6c
- S9. HPLC chromatogram of 6c
- S10. <sup>1</sup>H-NMR spectrum of 6d
- S11. <sup>13</sup>C-NMR Spectrum of 6d
- S12. HPLC chromatogram of 6d
- S13. <sup>1</sup>H-NMR spectrum of 6e
- S14. <sup>13</sup>C-NMR spectrum of 6e
- S15. HPLC chromatogram of 6e
- S16. <sup>1</sup>H-NMR spectrum of 6f
- S17. <sup>13</sup>C-NMR spectrum of 6f
- S18. HPLC chromatogram of 6f
- S19. <sup>1</sup>H-NMR spectrum of 6g
- S20. <sup>13</sup>C-NMR Spectrum of 6g
- S21. HPLC chromatogram of 6g
- S22. <sup>1</sup>H-NMR Spectrum of 6h
- S23. <sup>13</sup>C-NMR Spectrum of 6h
- S24. HRMS of 6h
- S25. <sup>1</sup>H-NMR Spectrum of 6i
- S26. <sup>13</sup>C-NMR Spectrum of 6i
- S27. HRMS of 6i
- S28. <sup>1</sup>H-NMR Spectrum of 6j
- S29. <sup>13</sup>C-NMR Spectrum of 6j
- S30. HPLC chromatogram of 6j
- S31. <sup>1</sup>H-NMR Spectrum of 6k
- S32. <sup>13</sup>C-NMR Spectrum of 6k
- S33. HPLC chromatogram of 6k
- S34. <sup>1</sup>H-NMR Spectrum of 6l
- S35. <sup>13</sup>C- NMR Spectrum of 6l
- S36. HPLC chromatogram 6l
- S37. <sup>1</sup>H-NMR Spectrum of 6m
- S38. <sup>13</sup>C-NMR Spectrum of 6m
- S39. HPLC chromatogram of 6m
- S40. <sup>1</sup>H-NMR Spectrum of 6n
- S41. <sup>13</sup>C-NMR Spectrum of 6n
- S42. HPLC chromatogram of 6n
- S43. <sup>1</sup>H-NMR Spectrum of 6o
- S44. <sup>13</sup>C- NMR Spectrum of 6o
- S45. HPLC chromatogram of 6o

- S46. <sup>1</sup>H-NMR Spectrum of 6p
- S47. <sup>13</sup>C-NMR Spectrum of 6p
- S48. HPLC chromatogram of 6p
- S49. <sup>1</sup>H-NMR Spectrum of 6q
- S50. <sup>13</sup>C-NMR Spectrum of 6q
- S51. HPLC chromatogram of 6q
- S52. <sup>1</sup>H-NMR Spectrum of 6r
- S53. <sup>13</sup>C-NMR Spectrum of 6r
- S54. HPLC chromatogram of 6r
- S55. <sup>1</sup>H-NMR Spectrum of 6s
- S56. <sup>13</sup>C-NMR Spectrum of 6sof
- S57. HPLC chromatogram of 6s
- S58. <sup>1</sup>H-NMR Spectrum of 6t
- S59. <sup>13</sup>C-NMR Spectrum of 6t
- S60. HPLC chromatogram of 6t
- S61. <sup>1</sup>H-NMR Spectrum of 6u
- S62. <sup>13</sup>C-NMR Spectrum of 6u
- S63. HPLC chromatogram of 6u
- S64. <sup>1</sup>H-NMR Spectrum of 6v
- S65. <sup>13</sup>C-NMR Spectrum of 6v
- S66. HPLC chromatogram of 6v
- S67. <sup>1</sup>H-NMR Spectrum of 6w
- S68. <sup>13</sup>C-NMR Spectrum of 6w
- S69. HPLC chromatogram of 6w
- S70. Material and method of receptor binding assay
- S71. Material and method of FLIPR assay
- S72. Material and method of in-vivo reversal of pentobarbital-induced sleeping time assay
- S73 Statistical analysis
- S74 Material methods functional observational Battery

## Experimental

The reaction monitoring and compounds purity was checked on pre-coated silica gel G<sub>254</sub> TLC plates (Merck) through the spotting and visualization under UV spectrophotometer or by exposing them to iodine vapors. Column chromatographic purification was carried out on Merck silica gel (230-400 mesh) or neutral alumina. IR spectra ( $\lambda_{\text{max}}$  in  $\text{cm}^{-1}$ ) were recorded on Nicolet FT-IR Impact 410 instrument either as neat or with KBr pellets.  $^1\text{H}$  NMR spectra were recorded on 400 MHz Bruker FT-NMR (Advance DP X 400) spectrometer-using tetramethylsilane as the internal standard and the chemical shifts are reported in  $\delta$  (ppm) units. Coupling constants are given in Hz. The following abbreviations are used to indicate the multiplicity: s, singlet; d, doublet; t, triplet; q, quartet; m, multiplet; bs, broad singlet. The sample concentration in each case was approximately 7 mg in 0.5 mL of the solvent. Mass spectra were recorded on either GCMS (Shimadzu QP 5000 spectrometer) auto sampler/direct injection (EI/CI) or LC (Finnigan Mat LCQ spectrometer) (APCI/ESI). The HRMS spectra were recorded on Bruker Maxis mass spectrometer. The melting points were recorded on capillary melting point apparatus or on the PerkinElmer DSC instrument and are uncorrected.

### General method for the synthesis of R<sub>1</sub>-L-His(1-alkyl)-L-ProNH<sub>2</sub> (6a-w)

The respective dipeptides (**4a-e**) were dissolved in 40%  $\text{CF}_3\text{CO}_2\text{H}$  in  $\text{CH}_2\text{Cl}_2$  (5 mL) and stirred for 30 min at 0 °C. The resulting dipeptide salt (**5a-e**) were neutralized by added a solution of 7N methanolic ammonia solution (5 mL) and stirring the mixture for 10 min at ambient temperature. The solvent was evaporated under reduced pressure to afford free dipeptide, which was used in the next coupling step without isolation. The free dipeptide (1 mmol) was dissolved in DMF (5 mL) and cooled to 4 °C. The requisite hetero ring-containing carboxylic acid (1 mmol), DIC (1.1 mmol) and 1-hydroxybenzotriazole (1.1 mmol) was added and the resulting mixture stirred at 4 °C for 36 h. The solvent was removed under reduced pressure and residue was purified by column chromatography using a stationary phase of neutral alumina and a mobile phase of 0-7%  $\text{CH}_3\text{OH}$  in  $\text{CH}_2\text{Cl}_2$  to afford **6a-w**.

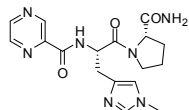

**2-Pyz-L-His(1-methyl)-L-ProNH<sub>2</sub> (6a):** Yield: 52%; white solid; mp.: 82-83 °C; IR (KBr): 3433, 1634  $\text{cm}^{-1}$ ;  $^1\text{H}$  NMR ( $\text{CD}_3\text{OD}$ ):  $\delta$  9.18 (d, 1H,  $J = 4$  Hz), 8.78 (d, 1H,  $J = 4$  Hz), 8.67 (d, 1H,  $J = 4$  Hz), 7.49 (s, 1H), 6.97 (s, 1H), 5.06 (m, 1H), 4.45 (m, 1H), 3.57-3.87 (m, 2H), 3.67 (m, 3H) 3.02-3.20 (m, 2H), 2.22 (m, 2H), 2.00 (m, 2H);  $^{13}\text{C}$  NMR (100 MHz,  $\text{CD}_3\text{OD}$ ):  $\delta$  175.67, 170.77, 163.24, 147.37, 144.37, 144.35, 143.44, 143.26, 137.64, 136.09, 119.08, 60.38, 51.67, 32.23, 29.66, 24.39; HRMS:  $m/z$  calcd for  $\text{C}_{17}\text{H}_{21}\text{N}_7\text{O}_3$   $[\text{M}+\text{H}]^+$ : 372.1784, found, 372.1780;  $R_f = 0.37$  [ $\text{CH}_3\text{OH}$ :10%  $\text{NH}_4\text{OH}$ : $\text{CH}_2\text{Cl}_2$  (8:2:90)]; HPLC:  $t_R = 3.78$  min, purity: 99.54% [ $\text{CH}_3\text{CN}$ - $\text{H}_2\text{O}$ -TFA (70:30:0.8%)].

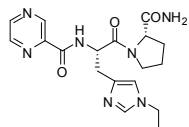

**2-Pyz-L-His(1-ethyl)-L-ProNH<sub>2</sub> (6b):** Yield: 45%; white solid mp.: 42-43 °C; IR (KBr): 3429, 1645  $\text{cm}^{-1}$ ;  $^1\text{H}$  NMR ( $\text{CD}_3\text{OD}$ ):  $\delta$  9.18 (d 1H,  $J = 4$  Hz) 8.78 (d, 1H,  $J = 4$  Hz), 8.67 (d, 1H,  $J = 4$  Hz), 7.56 (s, 1H), 7.05 (s, 1H), 5.07 (m, 1H), 4.60 (m, 1H), 3.99 (m, 2H), 3.67-3.86 (m, 2H), 3.08-3.17 (m, 2H), 2.00-1.96 (m, 4H), 1.39 (t, 3H,  $J = 4$  Hz);  $^{13}\text{C}$  NMR (100 MHz,  $\text{CD}_3\text{OD}$ ):  $\delta$  175.66, 170.78, 163.24, 147.37, 144.37, 144.35, 143.44, 143.26, 137.64, 136.094, 119.08, 60.38, 51.67, 32.23, 29.66, 24.39, 15.28; HRMS:  $m/z$  calcd for  $\text{C}_{18}\text{H}_{23}\text{N}_7\text{NaO}_3$   $[\text{M}+\text{Na}]^+$ : 408.1760, found, 408.1761;  $R_f = 0.42$  [ $\text{CH}_3\text{OH}$ :10%  $\text{NH}_4\text{OH}$ : $\text{CH}_2\text{Cl}_2$  (8:2:90)]; HPLC:  $t_R = 3.143$  min, purity: 96.302% [ $\text{CH}_3\text{CN}$ - $\text{H}_2\text{O}$ -TFA (70:30:0.8%)].



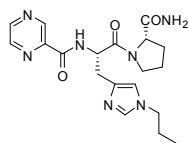

**2-Pyz-L-His(1-propyl)-L-ProNH<sub>2</sub> (6c):** Yield: 55%; white solid; mp.: 57-58°C; IR (KBr): 3433, 1634, cm<sup>-1</sup>; <sup>1</sup>H NMR (CDCl<sub>3</sub>): δ 9.20 (d, 1H, *J* = 4 Hz), 8.80 (d, 1H, *J* = 4 Hz), 8.69 (d, 1H, *J* = 4 Hz), 7.65 (s, 1H), 7.05 (s, 1H), 5.30 (m, 1H), 5.10 (m, 1H), 4.91 (m, 2H), 3.67 (m, 2H), 3.12-3.60 (m, 2H), 2.30 (m, 2H), 2.15 (m, 2H), 2.10 (m, 2H), 0.92 (t, 3H, *J* = 8 Hz); <sup>13</sup>C NMR (100 MHz, CDCl<sub>3</sub>): δ 175.69, 170.76, 163.19, 147.36, 144.34, 143.47, 136.99, 136.00, 117.85, 60.41, 51.69, 31.40, 29.79, 24.41; HRMS: *m/z* calcd for C<sub>19</sub>H<sub>25</sub>N<sub>7</sub>NaO<sub>3</sub> [M+Na]<sup>+</sup>: 422.1917, found, 422.1918; R<sub>f</sub> = 0.53 [CH<sub>3</sub>OH:10% NH<sub>4</sub>OH:CH<sub>2</sub>Cl<sub>2</sub> (8:2:90)]; HPLC: *t*<sub>R</sub> = 4.17 min, purity: 99.76% [CH<sub>3</sub>CN-H<sub>2</sub>O-TFA (70:30:0.8)].

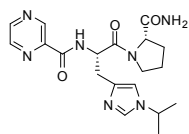

**2-Pyz-L-His(1-isopropyl)-L-ProNH<sub>2</sub> (6d):** Yield: 46%; white solid; mp.: 80-81°C; IR (KBr): 3434, 1634 cm<sup>-1</sup>; <sup>1</sup>H NMR (CD<sub>3</sub>OD): δ 9.20 (d, 1H, *J* = 6 Hz), 8.80 (m, 1H), 8.70 (m, 1H, *J* = 4 Hz), 7.63 (s, 1H), 7.15 (s, 1H), 5.09 (m, 1H), 4.47 (m, 1H), 4.38 (m, 1H), 3.52 (m, 2H), 3.06-3.23 (m, 2H), 2.23 (m, 2H), 2.01 (m, 2H), 1.47 (m, 6H); <sup>13</sup>C NMR (100 MHz, CD<sub>3</sub>OD): δ 175.66, 170.76, 163.20, 147.37, 1.44.36, 143.47, 135.87, 135.073, 115.72, 60.42, 51.76, 49.37 29.90, 29.23, 29.36, 24.39; HRMS: *m/z* calcd for C<sub>19</sub>H<sub>25</sub>N<sub>7</sub>NaO<sub>3</sub> [M+Na]<sup>+</sup>: 422.1917, found, 422.1910; R<sub>f</sub> = 0.51 [CH<sub>3</sub>OH:10% NH<sub>4</sub>OH:CH<sub>2</sub>Cl<sub>2</sub> (8:2:90)]; HPLC: *t*<sub>R</sub> = 4.31 min, purity: 99.22% [CH<sub>3</sub>CN-H<sub>2</sub>O-TFA (70:30:0.8%)].

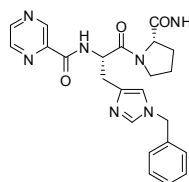

**2-Pyz-L-His(1-benzyl)-L-ProNH<sub>2</sub> (6e):** Yield: 52%; white solid; mp.: 70-71°C; IR (KBr): 3481, 1645 cm<sup>-1</sup>; <sup>1</sup>H NMR (CD<sub>3</sub>OD): δ 9.17 (d, 1H, *J* = 1.4 Hz), 8.80 (m, 1H), 8.63 (d, 1H, *J* = 4.04 Hz), 7.67 (s, 1H), 7.05-7.32 (m, 5H), 7.90 (s, 1H), 5.15 (s, 2H), 5.06 (m, 1H), 4.44 (m, 1H), 3.85 (m, 2H), 2.92-3.18 (m, 2H), 2.22 (m, 2H), 1.99 (m, 2H); <sup>13</sup>C NMR (100 MHz, CD<sub>3</sub>OD): δ 175.65, 170.73, 163.37, 143.23, 142.09, 141.58, 136.21, 128.03, 127.67, 127.00, 118.17, 60.23, 51.54, 50.21, 29.91, 29.36, 29.36, 24.38, 20.20; HRMS: *m/z* calcd for C<sub>23</sub>H<sub>25</sub>N<sub>7</sub>NaO<sub>3</sub> [M+Na]<sup>+</sup>: 470.1917, found, 470.1918; R<sub>f</sub> = 0.67 [CH<sub>3</sub>OH:10% NH<sub>4</sub>OH:CH<sub>2</sub>Cl<sub>2</sub> (8:2:90)]; HPLC: *t*<sub>R</sub> = 3.93 min, purity: 99.91% [CH<sub>3</sub>CN-H<sub>2</sub>O-TFA (70:30:0.8%)].

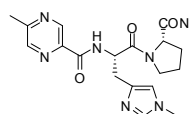

**5-Mpyz-L-His(1-methyl)-L-ProNH<sub>2</sub> (6f):** Yield: 50%; white solid; mp.: 51-52°C; IR (KBr): 3433, 1634 cm<sup>-1</sup>; <sup>1</sup>H NMR (CD<sub>3</sub>OD): δ 9.03 (s 1H), 8.78 (s 1H) 7.53 (s, 1H), 6.96 (s, 1H), 5.07 (m, 1H), 4.43 (m, 1H), 3.57-3.87 (m, 2H), 3.86 (m, 3H) 3.03-3.31 (m, 2H), 2.62 (s, 3H) 2.22 (m, 2H), 2.02 (m, 2H); <sup>13</sup>C NMR (100 MHz, CD<sub>3</sub>OD): δ 175.68, 170.88, 163.48, 155.57, 140.25, 140.25, 139.63, 136.11, 119.05, 60.38, 51.59, 32.23, 29.66, 24.39, 22.19; HRMS: *m/z* calcd for C<sub>18</sub>H<sub>23</sub>N<sub>7</sub>NaO<sub>3</sub>[M+Na]<sup>+</sup>: 408.1760, found, 408.1763; R<sub>f</sub> = 0.57 [CH<sub>3</sub>OH:10% NH<sub>4</sub>OH:CH<sub>2</sub>Cl<sub>2</sub> (8:2:90)]; HPLC: *t*<sub>R</sub> = 4.31 min, purity: 98.24% [CH<sub>3</sub>CN-H<sub>2</sub>O-TFA (70:30:0.8%)].

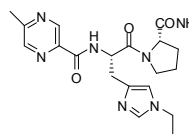

**5-Mpyz-L-His(1-ethyl)-L-ProNH<sub>2</sub> (6g):** Yield: 53%; white solid; mp.: 49-50°C; IR (KBr): 3418, 1644 cm<sup>-1</sup>; <sup>1</sup>H NMR (CDCl<sub>3</sub>): δ 9.23 (s, 1H), 8.40 (s, 1H), 7.35 (s, 1H), 6.80 (s, 1H), 5.07 (m, 1H), 4.66 (m, 1H), 3.96 (q, 2H, *J* = 7.6 Hz), 3.63 (m, 2H), 3.10-3.23 (m, 2H), 2.65 (s, 3H), 2.27 (m, 2H), 2.13 (m, 2H) 1.46 (d, 3H, *J* = 7.6 Hz); <sup>13</sup>C NMR (100 MHz, CDCl<sub>3</sub>): δ 174.67, 170.57, 163.37, 143.14, 142.63, 135.90, 116.92, 60.83, 51.29, 47.41, 41.97, 31.57, 29.25, 21.85, 16.23; HRMS: *m/z* calcd for C<sub>19</sub>H<sub>25</sub>N<sub>7</sub>NaO<sub>3</sub> [M+Na]<sup>+</sup>: 422.1917, found, 422.1916; R<sub>f</sub> = 0.67 [CH<sub>3</sub>OH:10% NH<sub>4</sub>OH:CH<sub>2</sub>Cl<sub>2</sub> (8:2:90)]; HPLC: *t*<sub>R</sub> = 4.42 min, purity: 97.94% [CH<sub>3</sub>CN-H<sub>2</sub>O-TFA (70:30:0.8%)].

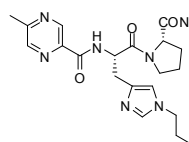

**5-Mpyz-L-His(1-propyl)-L-ProNH<sub>2</sub> (6h):** Yield: 43%; white solid; mp.: 47-48°C; IR (KBr): 3418, 1644 cm<sup>-1</sup>; <sup>1</sup>H NMR (CD<sub>3</sub>OD): δ 9.02 (s, 1H), 8.56 (s, 1H), 7.54 (s, 1H), 7.03 (s, 1H), 4.43 (m, 1H), 3.89 (m, 1H), 3.51 (s, 2H), 3.55 (m, 2H), 3.03-3.18 (m, 2H), 2.61 (s, 3H), 2.20 (m, 2H), 2.02 (m, 2H), 1.73 (m, 2H), 0.85 (m, 3H); <sup>13</sup>C NMR (100

MHz, CD<sub>3</sub>OD):  $\delta$  175.67, 170.82, 163.40, 143.24, 142.08, 141.63, 136.96, 136.04, 117.81, 60.41, 51.61, 29.86, 24.39, 23.86, 20.20, 9.79; HRMS:  $m/z$  calcd for C<sub>20</sub>H<sub>27</sub>N<sub>7</sub>NaO<sub>3</sub>; [M+Na]<sup>+</sup>: 436.2073, found, 436.2073; R<sub>f</sub> = 0.57 [CH<sub>3</sub>OH:10% NH<sub>4</sub>OH:CH<sub>2</sub>Cl<sub>2</sub> (8:2:90)]; HPLC:  $t_R$  = 4.17 min, purity: 99.76% [CH<sub>3</sub>CN-H<sub>2</sub>O-TFA (70:30:0.8%)].

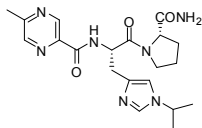

**5-Mpyz-L-His(1-isopropyl)-L-ProNH<sub>2</sub> (6i):** Yield: 48 %; white solid; mp: 52-53°C IR (KBr): 3434, 1634 cm<sup>-1</sup>; <sup>1</sup>H NMR (CD<sub>3</sub>OD):  $\delta$  9.20 (s, 1H), 8.80 (m, 1H), 7.63 (s, 1H), 7.15 (s, 1H), 5.09 (m, 1H), 4.47 (m, 1H), 4.38 (m, 1H), 3.52 (m, 2H), 3.06-3.23 (m, 2H), 2.65 (s, 3H), 2.23 (m, 2H), 2.01 (m, 2H), 1.47 (m, 6H); <sup>13</sup>C NMR (100 MHz, CD<sub>3</sub>OD):  $\delta$  175.66, 170.76, 163.20, 147.37, 144.36, 143.47, 135.87, 135.073, 115.72, 60.42, 51.76, 49.37 29.90, 29.23, 29.36, 24.39; HRMS:  $m/z$  calcd for C<sub>20</sub>H<sub>27</sub>N<sub>7</sub>NaO<sub>3</sub> [M+H]<sup>+</sup>: 414.2250, found, 414.2251; R<sub>f</sub> = 0.43 [CH<sub>3</sub>OH:10% NH<sub>4</sub>OH:CH<sub>2</sub>Cl<sub>2</sub> (8:2:90)]; HPLC:  $t_R$  = 4.31 min, purity: 97.42% [CH<sub>3</sub>CN-H<sub>2</sub>O-TFA (70:30:0.8%)].

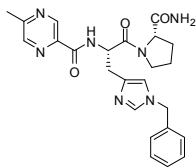

**5-Mpyz-L-His(1-benzyl)-L-ProNH<sub>2</sub> (6j):** Yield: 50%; mp.: 46-47°C; IR (KBr): 3481, 1645 cm<sup>-1</sup>; <sup>1</sup>H NMR (CDCl<sub>3</sub>):  $\delta$  9.00 (s, 1H), 8.51 (s, 1H), 7.64 (s, 1H), 7.20-7.27 (m, 5H), 7.02 (s, 1H), 5.13 (s, 2H), 5.04 (m, 1H), 4.43 (m, 1H) 3.79 (m, 2H), 3.01-3.19 (m, 2H), 2.63 (s, 3H), 2.19 (m, 2H), 1.99 (m, 2H); <sup>13</sup>C NMR (100 MHz, CD<sub>3</sub>OD):  $\delta$  175.64, 170.80, 163.37, 143.233, 142.091, 141.58, 136.21, 128.032, 127.67, 127.06, 118.17, 60.23, 51.54, 50.21, 29.91, 29.36, 29.36, 24.38, 20.20; HRMS:  $m/z$  calcd for C<sub>24</sub>H<sub>27</sub>N<sub>7</sub>NaO<sub>3</sub> [M+Na]<sup>+</sup>: 484.2073, found, 484.2076; R<sub>f</sub> = 0.67 [CH<sub>3</sub>OH:10% NH<sub>4</sub>OH:CH<sub>2</sub>Cl<sub>2</sub> (8:2:90)]; HPLC:  $t_R$  = 3.93 min, purity: 99.91% [CH<sub>3</sub>CN-H<sub>2</sub>O-TFA (70:30:0.8%)].

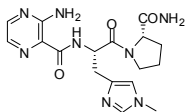

**3-Apyz-L-His(1-methyl)-L-ProNH<sub>2</sub> (6k):** Yield: 52%; colorless solid; mp.: 75-76°C; IR (KBr): 3434, 1641 cm<sup>-1</sup>; <sup>1</sup>H NMR (CD<sub>3</sub>OD):  $\delta$  8.14 (d, 1H,  $J$  = 8 Hz) 7.72 (m, 1H) 7.41 (s, 1H), 6.83 (s, 1H), 4.92 (m, 1H), 4.33 (m, 1H), 3.57 (s, 3H), 3.20 (m, 2H), 2.99-3.05 (m, 2H), 2.12 (m, 2H), 2.07 (m, 2H); <sup>13</sup>C NMR (100 MHz, CD<sub>3</sub>OD):  $\delta$  175.74, 171.23, 162.29, 146.49, 137.62, 136.19, 131.21, 119.03, 60.37, 52.09, 51.23, 32.26, 29.84, 29.34, 29.02, 24.37, 23.63; HRMS:  $m/z$  calcd for C<sub>17</sub>H<sub>22</sub>N<sub>8</sub>NaO<sub>3</sub> [M+Na]<sup>+</sup>: 409.1713, found, 409.1714; R<sub>f</sub> = 0.37 [CH<sub>3</sub>OH:10% NH<sub>4</sub>OH:CH<sub>2</sub>Cl<sub>2</sub> (8:2:90)]; HPLC:  $t_R$  = 3.82 min, purity: 97.83% [CH<sub>3</sub>CN-H<sub>2</sub>O-TFA (70:50:0.8%)].

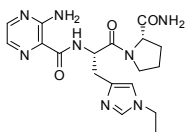

**3-Apyz-L-His(1-ethyl)-L-ProNH<sub>2</sub> (6l):** Yield: 47%; colorless solid; mp.: 70-72°C; IR (KBr): 3435, 1634 cm<sup>-1</sup>; <sup>1</sup>H NMR (CDCl<sub>3</sub>):  $\delta$  9.18 (bs, 2H), 8.70 (bs, 1H), 8.14 (d, 1H,  $J$  = 8 Hz), 7.82 (m, 1H,  $J$  = 4 Hz), 7.34 (s, 1H), 6.80 (s, 1H), 5.38 (bs, 1H), 4.97 (m, 1H), 4.64 (m, 1H), 3.93 (t, 2H,  $J$  = 16 Hz), 3.63 (m, 2H), 3.05-3.31 (m, 2H), 2.28 (m, 2H), 2.09 (m, 2H), 1.44 (t, 3H,  $J$  = 2.8 Hz); <sup>13</sup>C NMR (100 MHz, CD<sub>3</sub>OD):  $\delta$  175.74, 171.23, 162.29, 146.49, 137.62, 136.19, 131.24, 119.1, 60.37, 52.09, 51.23, 32.26, 29.84, 29.34, 29.02, 24.37, 23.63, 15.10; HRMS:  $m/z$  calcd for C<sub>18</sub>H<sub>24</sub>N<sub>8</sub>NaO<sub>3</sub> [M+Na]<sup>+</sup>: 433.1869, found, 433.1869; R<sub>f</sub> = 0.42 [CH<sub>3</sub>OH:10% NH<sub>4</sub>OH:CH<sub>2</sub>Cl<sub>2</sub> (8:2:90)]; HPLC:  $t_R$  = 4.12 min, purity: 99.95% [CH<sub>3</sub>CN-H<sub>2</sub>O-TFA (70:50:0.8%)].

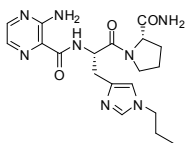

**3-Apyz-L-His(1-propyl)-L-ProNH<sub>2</sub> (6m):** Yield: 50%; white solid; mp.: 74-75°C IR (KBr): 3429 1638, cm<sup>-1</sup>; <sup>1</sup>H NMR (CD<sub>3</sub>OD):  $\delta$  8.14 (d, 1H,  $J$  = 4 Hz), 7.83 (d, 1H,  $J$  = 4 Hz), 7.56 (s, 1H), 7.04 (s, 1H), 5.04 (m, 1H), 4.48 (m, 1H), 3.94 (t, 2H,  $J$  = 7.04 Hz), 3.55 (m, 2H), 3.00-3.15 (m, 2H), 2.22 (m, 2H), 2.02 (m, 2H), 1.79 (m, 3H), 0.87 (t, 3H,  $J$  = 7.6 Hz); <sup>13</sup>C NMR (100 MHz, CD<sub>3</sub>OD):  $\delta$  175.54, 171.20, 169.94, 165.81, 155.16, 146.49, 137.05, 136.14, 131.11, 60.40, 52.10, 51.24, 29.99, 29.35, 24.39, 9.80; HRMS:  $m/z$  calcd for C<sub>19</sub>H<sub>26</sub>N<sub>8</sub>NaO<sub>3</sub> [M+Na]<sup>+</sup>: 437.2026, found, 437.2020; R<sub>f</sub> = 0.50 [CH<sub>3</sub>OH:10% NH<sub>4</sub>OH:CH<sub>2</sub>Cl<sub>2</sub> (8:2:90)]; HPLC:  $t_R$  = 4.58 min, purity: 99.92% [CH<sub>3</sub>CN-H<sub>2</sub>O-TFA (70:50:0.8%)].

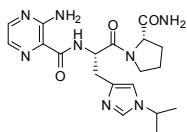

**3-Apyz-L-His(1-isopropyl)-L-ProNH<sub>2</sub> (6n):** Yield: 50%; white solid; mp.: 57-58 °C; IR (KBr): 3429 1638, cm<sup>-1</sup>; <sup>1</sup>H NMR (CD<sub>3</sub>OD): δ 8.13 (d, 1H, *J* = 2.32 Hz), 7.83 (d, 1H, *J* = 2.36 Hz), 7.66 (s, 1H), 7.11 (s, 1H), 5.01 (m, 1H), 4.90 (m, 1H), 4.46 (m, 1H), 3.50 (m, 2H), 3.01-3.16 (m, 2H), 1.96-2.23 (m, 4H), 1.45 (m, 6H); <sup>13</sup>C NMR (100 MHz, CD<sub>3</sub>OD): δ 175.73, 171.20, 171.63, 166.19, 155.13, 146.50, 136.28, 136.14, 131, 125.83, 115.42, 60.42, 58.89, 55.22, 51.43, 49.43, 31.34, 30.06, 29.99, 28.30, 24.39, 21.99, 21.76; HRMS: *m/z* calcd for C<sub>19</sub>H<sub>26</sub>N<sub>8</sub>NaO<sub>3</sub> [M+Na]<sup>+</sup>: 437.2026, found, 437.2021; *R<sub>f</sub>* = 0.50 [CH<sub>3</sub>OH:10% NH<sub>4</sub>OH:CH<sub>2</sub>Cl<sub>2</sub> (8:2:90)]; HPLC: *t<sub>R</sub>* = 4.68 min, purity: 99.84% [CH<sub>3</sub>CN-H<sub>2</sub>O-TFA (70:50:0.8%)].

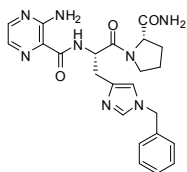

**3-Apyz-L-His(1-benzyl)-L-ProNH<sub>2</sub> (6o):** Yield: 50%; light brown solid; mp.: 59-61 °C; IR (KBr): 3430, 1641 cm<sup>-1</sup>; <sup>1</sup>H NMR (CD<sub>3</sub>OD): δ 8.11 (m, 1H), 7.77 (m, 1H), 7.64 (s, 1H), 7.25-7.29 (m, 5H), 7.02 (s, 1H), 5.14 (s, 2H), 4.99 (m, 1H), 4.41 (m, 1H), 3.80 (m, 2H), 3.31-3.02 (m, 2H), 2.20 (m, 2H), 1.98 (m, 2H); <sup>13</sup>C NMR (100 MHz, CD<sub>3</sub>OD): δ 175.58, 170.80, 166.01, 154.09, 146.49, 145.25, 135.44, 131.27, 128.40, 127.39, 126.0, 125.68, 92.17, 78.07, 60.63, 53.33, 50.87, 31.09, 29.39, 24.39; HRMS: *m/z* calcd for C<sub>23</sub>H<sub>26</sub>N<sub>8</sub>NaO<sub>3</sub> [M+Na]<sup>+</sup>: 485.2026, found 485.2023; *R<sub>f</sub>* = 0.37 [CH<sub>3</sub>OH:10% NH<sub>4</sub>OH:CH<sub>2</sub>Cl<sub>2</sub> (8:2:90)]; HPLC: *t<sub>R</sub>* = 3.82 min, purity: 97.83% [CH<sub>3</sub>CN-H<sub>2</sub>O-TFA (70:50:0.8%)].

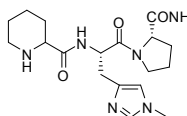

**2-Pip-L-His(1-methyl)-L-ProNH<sub>2</sub> (6p):** Yield: 42%; white solid; mp.: 127-128 °C; IR (KBr): 3481, 1645 cm<sup>-1</sup>; <sup>1</sup>H NMR (CD<sub>3</sub>OD): δ 7.38 (s, 1H), 6.82 (s, 1H), 4.30 (m, 1H), 3.69 (m, 1H), 3.57 (s, 3H), 3.36 (m, 1H), 3.33 (m, 2H), 2.96-3.11 (m, 2H), 2.53 (m, 2H), 3.24 (m, 2H) 1.17-1.190 (m, 8H); <sup>13</sup>C NMR (100 MHz, CD<sub>3</sub>OD): δ 177.08, 175.75, 174.10, 171.32, 137.57, 136.38, 88.89, 60.31, 59.23, 51.33, 45.00, 32.26, 29.81, 29.62, 25.27, 23.77, 23.65; HRMS: *m/z* calcd for C<sub>18</sub>H<sub>28</sub>N<sub>6</sub>NaO<sub>3</sub> [M+Na]<sup>+</sup>: 399.2121, found, 399.2120; *R<sub>f</sub>* = 0.32 [CH<sub>3</sub>OH:10% NH<sub>4</sub>OH:CH<sub>2</sub>Cl<sub>2</sub> (12:2:88)]; HPLC: *t<sub>R</sub>* = 4.30 min, purity: 97.91% [CH<sub>3</sub>CN-H<sub>2</sub>O-TFA (70:30:0.8%)].

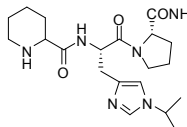

**2-Pip-L-His(1-isopropyl)-L-ProNH<sub>2</sub> (6q):** Yield: 23%; colorless solid; mp.: 102-103 °C; IR (KBr): 3481, 1645 cm<sup>-1</sup>; <sup>1</sup>H NMR (CD<sub>3</sub>OD): δ 7.57 (s, 1H), 7.23 (s, 1H), 5.19 (m, 1H), 4.42 (m, 1H), 3.96 (m, 1H) 3.78 (m, 1H), 3.22 (m, 2H), 2.86-3.14 (m, 2H), 1.28-2.21 (m, 10H), 1.60 (m, 6H); <sup>13</sup>C NMR (100 MHz, CD<sub>3</sub>OD): δ 175.08, 169.94, 136.57, 135, 126.38, 67.31, 64.30, 59.23, 51.33, 45.10, 32.16, 29.81, 29.62, 25.27, 23.77, 23.0; HRMS: *m/z* calcd for C<sub>18</sub>H<sub>28</sub>N<sub>6</sub>NaO<sub>3</sub> [M+Na]<sup>+</sup>: 427.2540, found, 427.2545; *R<sub>f</sub>* = 0.31 [CH<sub>3</sub>OH:10% NH<sub>4</sub>OH:CH<sub>2</sub>Cl<sub>2</sub> (12:2:88)]; HPLC: *t<sub>R</sub>* = 4.54 min, purity: 99.55% [CH<sub>3</sub>CN-H<sub>2</sub>O-TFA (70:30:0.8%)].

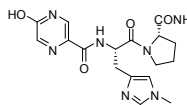

**5-Hpyz-L-His(1-methyl)-L-ProNH<sub>2</sub> (6r):** Yield: 42%; white solid; mp.: 157-158°C; IR (KBr): 3481, 1645 cm<sup>-1</sup>; <sup>1</sup>H NMR (CD<sub>3</sub>OD): δ 8.50 (s, 1H), 8.13 (s, 1H), 7.99 (s, 1H), 7.30 (s, 1H), 5.14 (m, 1H), 4.47 (m, 1H), 3.85 (s, 3H), 3.80 (m, 2H), 3.16-3.22 (m, 2H), 2.30 (m, 2H), 1.96-2.01 (m, 2H); <sup>13</sup>C NMR (100 MHz, CD<sub>3</sub>OD): δ 175.85, 169.20, 163.08, 161.82, 157.07, 146.89, 135.21, 132.06, 129.06, 126.36, 121.37, 118.18 115.37, 60.14, 53.41, 50.41, 34.26, 29.69, 27.05, 24.60, 21.17; HRMS: *m/z* calcd for C<sub>17</sub>H<sub>21</sub>N<sub>7</sub>NaO<sub>4</sub> [M+Na]<sup>+</sup>: 410.1553, found, 410.1552; *R<sub>f</sub>* = 0.20 [CH<sub>3</sub>OH:10% NH<sub>4</sub>OH:CH<sub>2</sub>Cl<sub>2</sub> (8:2:90)]; HPLC: *t<sub>R</sub>* = 3.86 min, purity: 99.83% [CH<sub>3</sub>CN-H<sub>2</sub>O-TFA (70:30:0.8%)].

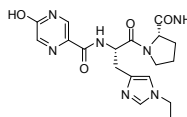

**5-Hpyz-L-His(1-ethyl)-L-ProNH<sub>2</sub> (6s):** Yield: 33%; white powder; mp.: 143-144°C; IR (KBr): 3481, 1645 cm<sup>-1</sup>; <sup>1</sup>H NMR (CD<sub>3</sub>OD): δ 8.56 (s, 1H), 8.16 (s, 1H), 7.83 (s, 1H), 7.46 (s, 1H), 5.18 (m, 1H), 4.57 (m, 1H), 4.15 (m, 2H), 3.70 (m, 2H), 2.99-3.22 (m, 2H), 1.97-2.30 (m, 4H), 1.96-2.01 (m, 2H), 1.45 (t, 3H, *J* = 7.36 Hz); <sup>13</sup>C NMR

(100 MHz, CD<sub>3</sub>OD):  $\delta$  175.83, 169.23, 161.83, 161.48, 157.08, 146.88, 134.74, 131.82, 130.71, 119.18, 118.28, 115.53, 60.17, 53.45, 43.75, 29.68, 27.24, 14.42; HRMS:  $m/z$  calcd for C<sub>18</sub>H<sub>23</sub>N<sub>7</sub>NaO<sub>4</sub> [M+Na]<sup>+</sup>: 424.1710, found 424.1711; R<sub>f</sub> = 0.67 [CH<sub>3</sub>OH:10% NH<sub>4</sub>OH:CH<sub>2</sub>Cl<sub>2</sub> (8:2:90)]; HPLC:  $t_R$  = 3.86 min, purity: 98.73% [CH<sub>3</sub>CN-H<sub>2</sub>O-TFA (70:30:0.8%)].

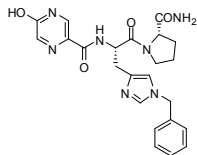

**5-Hpyz-L-His(1-benzyl)-L-ProNH<sub>2</sub> (6t):** Yield: 38%; white powder; mp.: 222-224°C; IR (KBr): 3481, 1645 cm<sup>-1</sup>; <sup>1</sup>H NMR (CD<sub>3</sub>OD):  $\delta$  8.44 (s, 1H), 7.66 (s, 1H), 7.60 (s, 1H), 7.69 (s, 1H), 7.10-7.23 (m, 5H), 7.10 (s, 1H), 5.18 (s, 2H), 4.98 (m, 1H), 4.35 (m, 1H), 3.80 (m, 2H), 3.01-3.12 (m, 2H), 2.14 (m, 2H), 1.96 (m, 2H); <sup>13</sup>C NMR (100 MHz, CD<sub>3</sub>OD):  $\delta$  175.82, 169.08, 162.92, 161.89, 162.24, 161.55, 147.69, 146.85, 135.21, 134.45, 130.03, 127.67, 126.11, 118.17, 60.23, 51.54, 50.21, 33.92, 29.65, 26.89, 24.38; HRMS:  $m/z$  calcd for C<sub>23</sub>H<sub>25</sub>N<sub>7</sub>NaO<sub>4</sub> [M+Na]<sup>+</sup>: 486.1866, found, 486.1860; R<sub>f</sub> = 0.67 [CH<sub>3</sub>OH:10% NH<sub>4</sub>OH:CH<sub>2</sub>Cl<sub>2</sub> (8:2:90)]; HPLC:  $t_R$  = 4.56 min, purity: 97.83% [CH<sub>3</sub>CN-H<sub>2</sub>O-TFA (70:30:0.8%)].

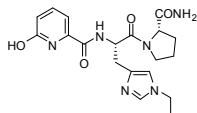

**6-Hpic-L-His(1-ethyl)-L-ProNH<sub>2</sub> (6u):** Yield: 50%; white powder; mp.: 210-211°C; IR (KBr): 3472, 1646 cm<sup>-1</sup>; <sup>1</sup>H NMR (CD<sub>3</sub>OD):  $\delta$  8.75 (m, 1H) 7.44 (s, 1H), 7.37 (s, 1H), 6.81 (s, 1H), 6.79 (m, 1H), 5.16 (m, 1H), 4.87 (m, 1H), 3.82 (m, 2H), 3.49-3.62 (m, 2H), 3.19-3.26 (m, 2H), 2.65 (m, 2H), 1.80 (m, 3H); <sup>13</sup>C NMR (100 MHz, CD<sub>3</sub>OD):  $\delta$  177.36, 169.91, 165.47, 140.73, 139.47, 135.66, 127.87, 118.46, 118.17, 114.35, 61.23, 55.70, 49.52, 28.68, 25.52, 23.87; HRMS:  $m/z$  calcd for C<sub>19</sub>H<sub>24</sub>N<sub>6</sub>NaO<sub>4</sub> [M+Na]<sup>+</sup>: 423.1757, found 423.1756; R<sub>f</sub> = 0.37 [CH<sub>3</sub>OH:10%, NH<sub>4</sub>OH:CH<sub>2</sub>Cl<sub>2</sub> (8:2:90)]; HPLC:  $t_R$  = 4.32 min, purity: 96.62% [CH<sub>3</sub>CN-H<sub>2</sub>O-TFA (70:30:0.8%)].

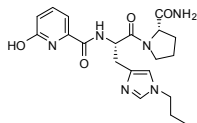

**6-Hpic-L-His(1-propyl)-L-ProNH<sub>2</sub> (6v):** Yield: 50%; white powder; mp.: 210-211°C; IR (KBr): 3472, 1646 cm<sup>-1</sup>; <sup>1</sup>H NMR (CD<sub>3</sub>OD):  $\delta$  8.58 (m, 1H) 7.52 (m, 1H), 7.10 (s, 1H), 6.60 (m, 1H), 6.67 (s, 1H), 5.40 (m, 1H), 4.98 (m, 1H), 3.93 (m, 2H), 3.64-3.47 (m, 2H), 3.06-3.16 (m, 2H), 2.11 (m, 2H), 1.10 (m, 2H), 0.68 (m, 3H); <sup>13</sup>C NMR (100 MHz, CD<sub>3</sub>OD):  $\delta$  168.96, 161.91, 161.57, 140.72, 134.76, 129.87, 120.46, 118.17, 115.35, 60.23, 50.70, 50.52, 29.68, 26.52, 24.57, 23.02; HRMS:  $m/z$  calcd for C<sub>20</sub>H<sub>26</sub>N<sub>7</sub>NaO<sub>4</sub> [M+Na]<sup>+</sup>: 486.1860, found, 486.1862; R<sub>f</sub> = 0.37 [CH<sub>3</sub>OH:10%, NH<sub>4</sub>OH:CH<sub>2</sub>Cl<sub>2</sub> (8:2:90)]; HPLC:  $t_R$  = 4.00 min, purity: 99.60% [CH<sub>3</sub>CN-H<sub>2</sub>O-TFA (70:30:0.8%)].

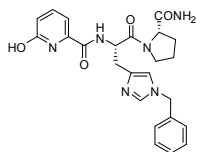

**6-Hpic-L-His(1-benzyl)-L-ProNH<sub>2</sub> (6w):** Yield: 50%; white powder; mp.: 175-176°C; IR (KBr): 3481, 1645 cm<sup>-1</sup>; <sup>1</sup>H NMR (CD<sub>3</sub>OD):  $\delta$  8.44 (m, 1H), 7.58 (d, 1H, *J* = 7.28 Hz), 7.23 (s, 1H), 7.20-7.58 (s, 5H), 7.21 (s, 1H), 6.69 (m, 1H) 6.67 (s, 1H), 5.38 (s, 2H), 5.01 (m, 1H), 4.34 (m, 1H), 3.43-3.71 (m, 2H), 2.94-3.17 (m, 2H); <sup>13</sup>C NMR (100 MHz, CD<sub>3</sub>OD):  $\delta$  169.45, 162.92, 162.24, 161.89, 161.55, 147.69, 146.85, 135.21, 134.45, 130.10, 127.67, 126.00, 116.17, 60.23, 51.54, 50.21, 33.92, 29.65, 26.89, 24.38; HRMS:  $m/z$  calcd for C<sub>19</sub>H<sub>24</sub>N<sub>6</sub>NaO<sub>4</sub> [M+Na]<sup>+</sup>: 486.1960, found, 486.1960; R<sub>f</sub> = 0.67 [CH<sub>3</sub>OH:10%, NH<sub>4</sub>OH:CH<sub>2</sub>Cl<sub>2</sub> (8:2:90)] HPLC:  $t_R$  = 4.56 min, purity: 97.38% [CH<sub>3</sub>CN-H<sub>2</sub>O-TFA (70:30:0.8%)].

# S1. <sup>1</sup>H-NMR Spectrum of 6a

np-1892  
 PROTON MeOD {D:\FACULTY\RahulJain\2012\sep\NMR} niper 88

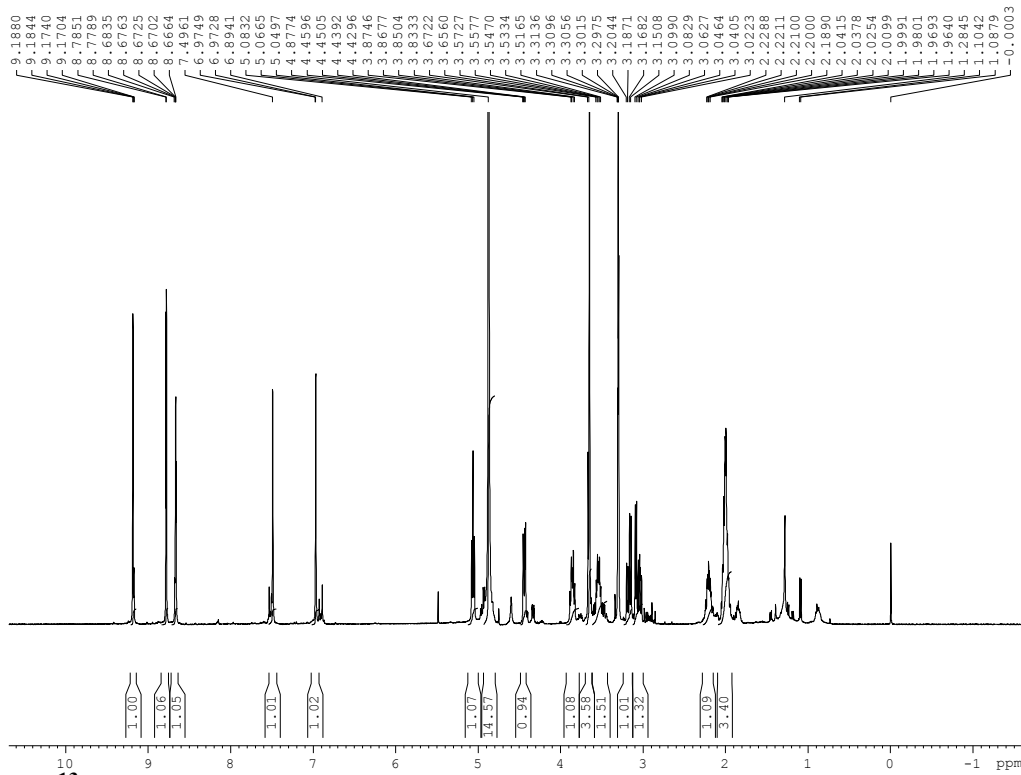

```

NAME      np-1892
EXPNO     10
PROCNO    1
Date_     20121001
Time      9.45
INSTRUM   spect
PROBHD    5 mm PABBO BB-
PULPROG   zg30
TD        65536
SOLVENT   MeOD
NS        16
DS        2
SWH       8223.685 Hz
FIDRES    0.125483 Hz
AQ        3.9846387 sec
RG        203
DW        60.800 usec
DE        6.50 usec
TE        295.5 K
D1        1.00000000 sec
TD0       1

===== CHANNEL f1 =====
NUC1      1H
P1        12.20 usec
PL1       -2.00 dB
PL1W     14.80958652 W
SFO1     400.1324710 MHz
SI        32768
SF        400.1300097 MHz
WDW       EM
SSB       0
LB        0.30 Hz
GB        0
PC        1.40
  
```

# S2. <sup>13</sup>C-NMR Spectrum of 6a

np-1892  
 C13CPD512 MeOD {D:\FACULTY\RahulJain\2012\sep\NMR} niper 88

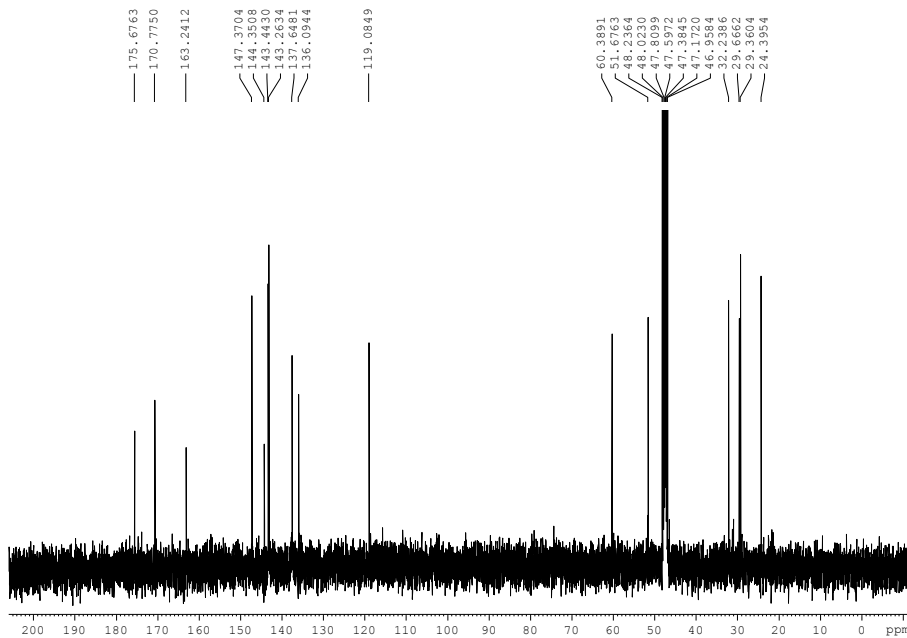

```

NAME      np-1892
EXPNO     11
PROCNO    1
Date_     20121001
Time      10.16
INSTRUM   spect
PROBHD    5 mm PABBO BB-
PULPROG   zgpg30
TD        65536
SOLVENT   MeOD
NS        4
DS        4
SWH       24038.461 Hz
FIDRES    0.366798 Hz
AQ        1.3631988 sec
RG        203
DW        20.800 usec
DE        6.50 usec
TE        296.2 K
D1        2.00000000 sec
D11       0.03000000 sec
TD0       1

===== CHANNEL f1 =====
NUC1      13C
P1        9.50 usec
PL1       -1.00 dB
PL1W     44.90434265 W
SFO1     100.6228298 MHz

===== CHANNEL f2 =====
CPDPRG2   waltz16
NUC2      1H
PCPD2     80.00 usec
PL2       -2.00 dB
PL12     14.33 dB
PL13     18.33 dB
PL2W     14.80958652 W
PL12W    0.34478071 W
PL13W    0.13725966 W
SFO2     400.1316005 MHz
SI        32768
SF        100.6127690 MHz
WDW       EM
SSB       0
LB        1.00 Hz
GB        0
PC        1.40
  
```

### S3. HPLC chromatogram of 6a

#### Sample Information

Acquired by : CLM  
Sample Name : 1892  
Sample ID : 1892  
Tray# : 1  
Vial# : 12  
Injection Volume : 10 uL  
Data Filename : 1892.lcd  
Method Filename : 70%-B-PLOT-15 MIN.lcm  
Batch Filename : 30.9.12B9.lcb  
Report Filename : sunil C-18.lcr  
Date Acquired : 10/1/2012 3:50:48 AM  
Data Processed : 10/1/2012 12:12:32 PM  
Column : RP-18  
Flow Rate : 1.0 mL/min

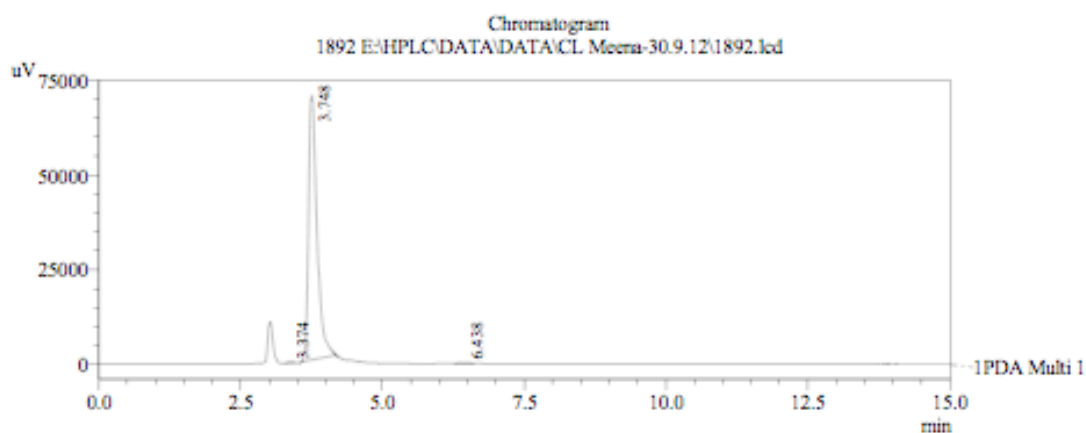

PeakTable

PDA Ch1 254nm 4nm

| Peak# | Ret. Time | Area   | Height | Area %  |
|-------|-----------|--------|--------|---------|
| 1     | 3.374     | 1641   | 251    | 0.224   |
| 2     | 3.748     | 728679 | 69936  | 99.547  |
| 3     | 6.438     | 1675   | 130    | 0.229   |
| Total |           | 731995 | 70317  | 100.000 |

# S4. <sup>1</sup>H Spectrum of 6b

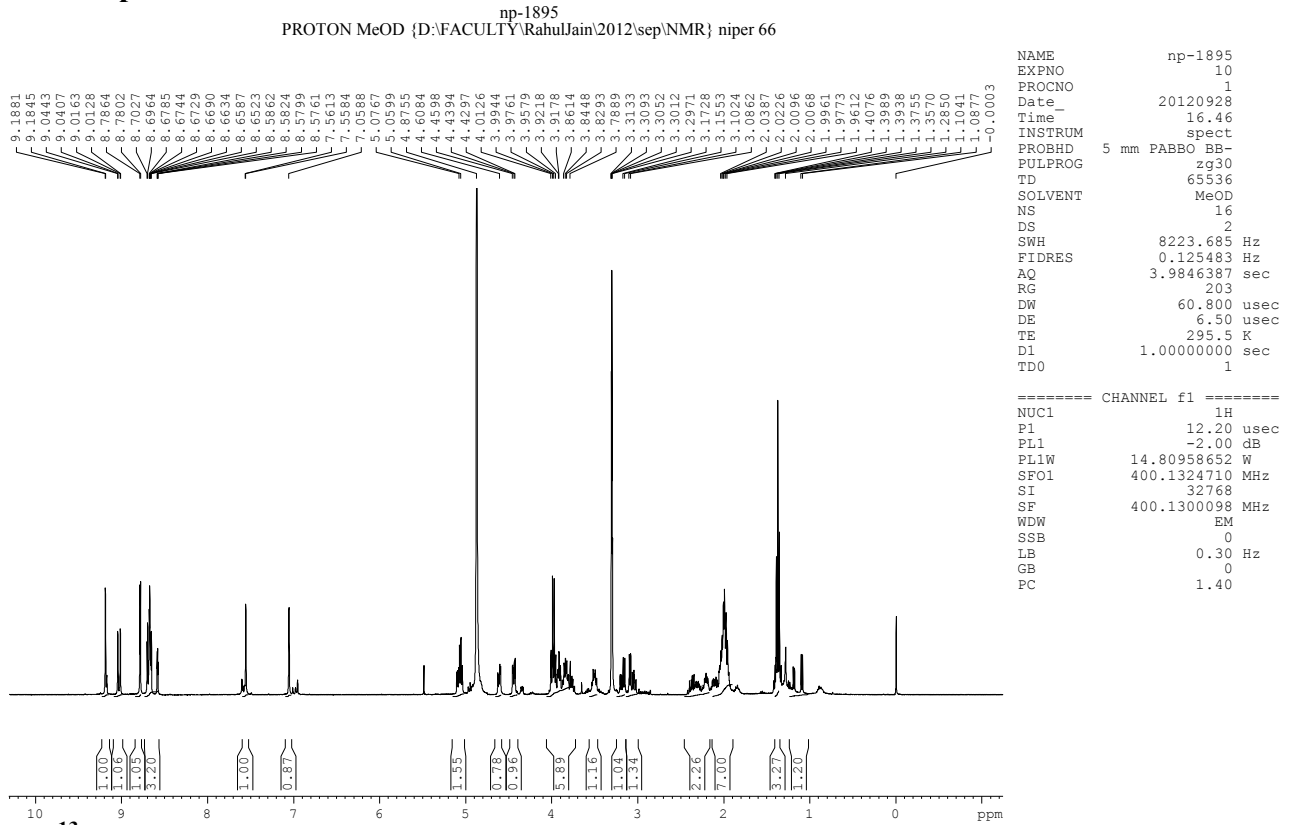

# S5. <sup>13</sup>C-NMR Spectrum of 6b

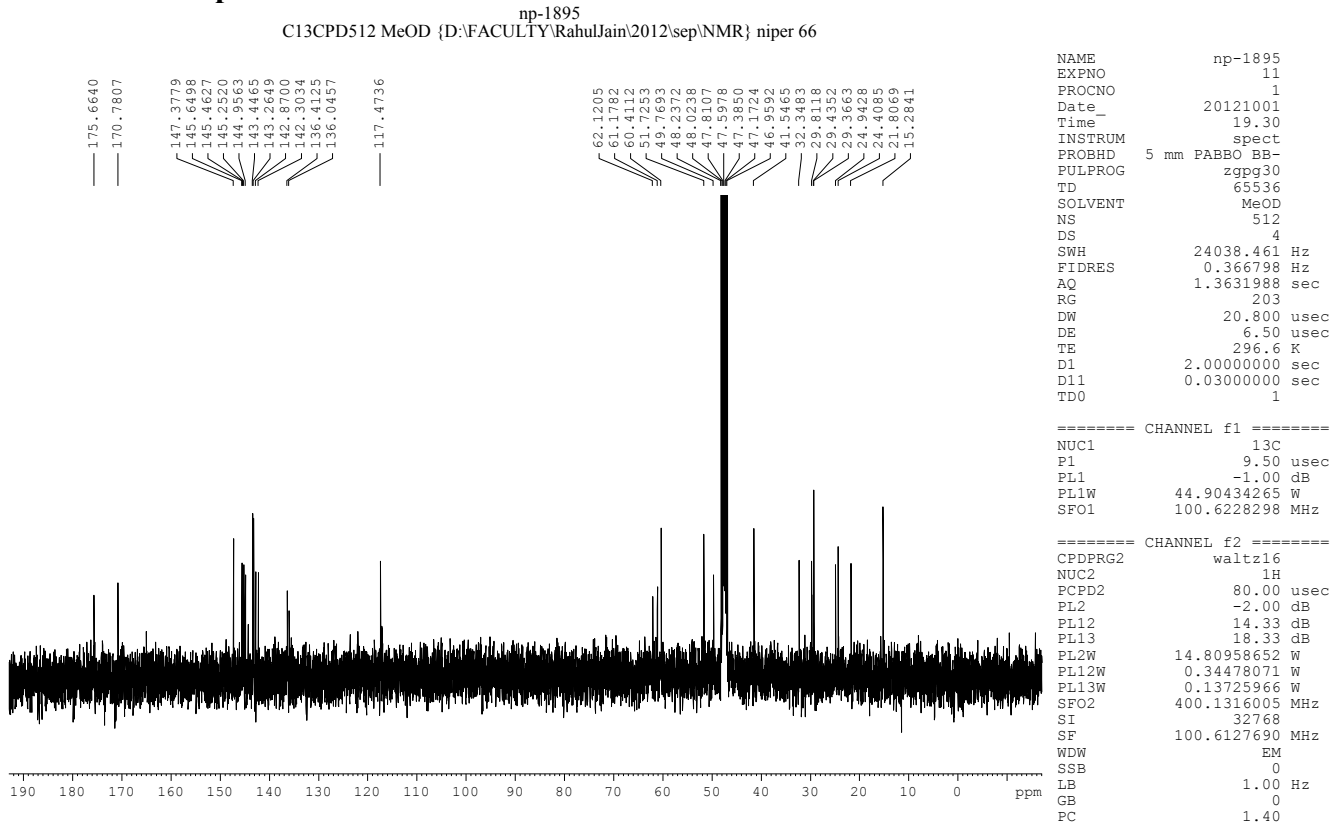

## S6. HPLC Spectrum of 6b

### Sample Information

Acquired by : SChhuttan L. Meena  
Sample Name : DBT  
Sample ID : DBT  
Tray# : 1  
Vail# : 9  
Injection Volume : 10 uL  
Data Filename : DBT.lcd  
Method Filename : 70%-B-PLOT-15 MIN.lcm  
Batch Filename : 30.9.12B9.lcb  
Report Filename : sumil C-18.lcr  
Date Acquired : 10/1/2012 3:04:14 AM  
Data Processed : 10/1/2012 2:03:05 PM  
Column : RP-18  
Flow Rate : 1.0 mL/min

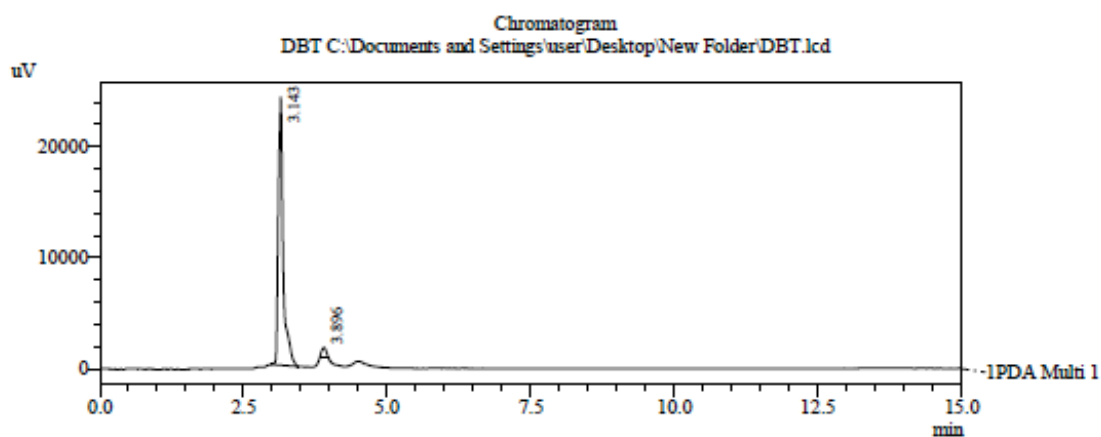

PeakTable

PDA Ch1 254nm 4nm

| Peak# | Ret. Time | Area   | Height | Area %  |
|-------|-----------|--------|--------|---------|
| 1     | 3.143     | 139763 | 24096  | 96.302  |
| 2     | 3.896     | 5367   | 937    | 3.698   |
| Total |           | 145130 | 25033  | 100.000 |



### S7. <sup>1</sup>H-NMR Spectrum of 6c

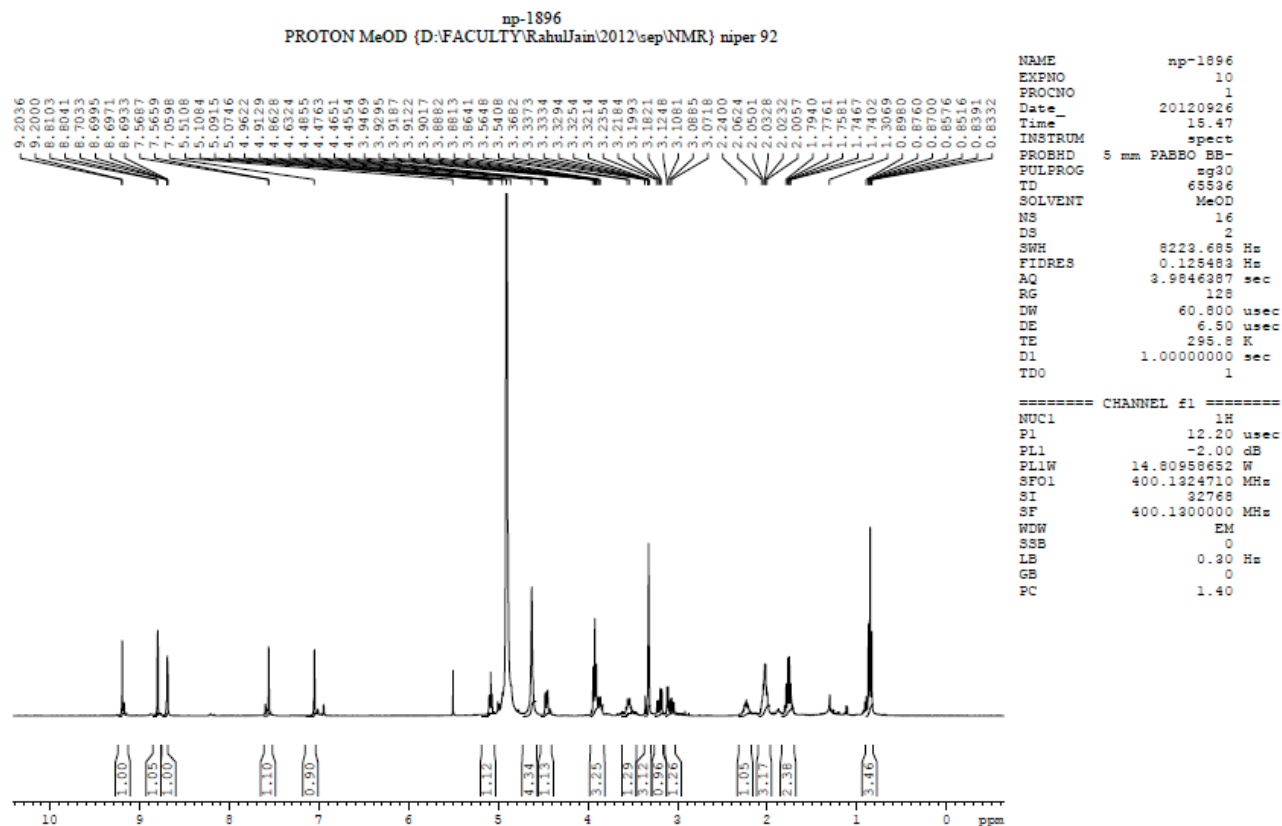

### S8. <sup>13</sup>C-NMR Spectrum of 6c

np-1896  
 C13CPD512 MeOD (D:\FACULTY\RahulJain\2012\sep\NMR) niper 92

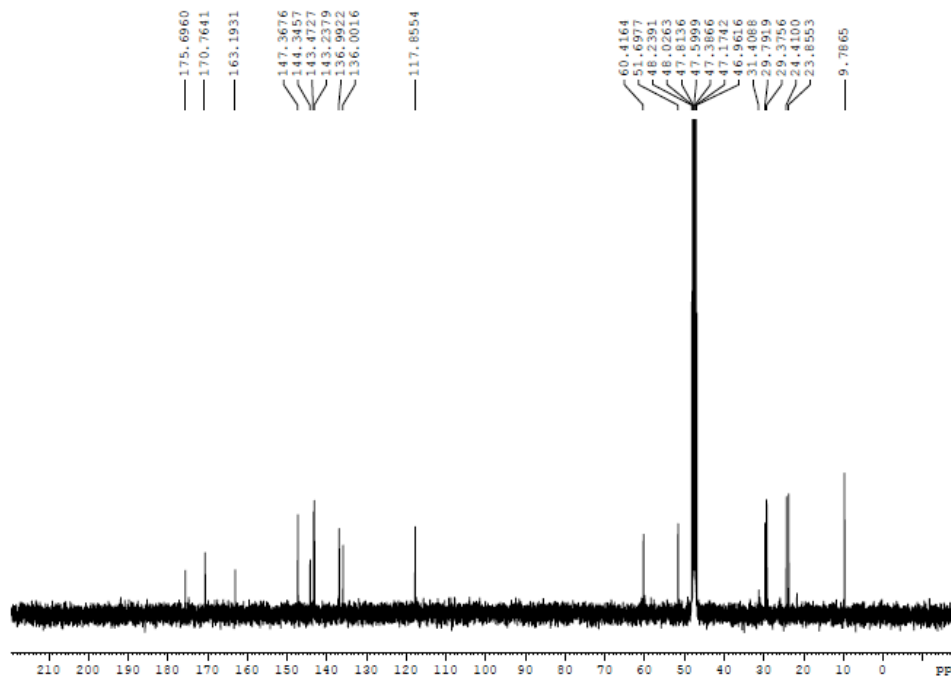

```

NAME          np-1896
EXPNO         11
PROCNO        1
Date_         20120928
Time          3.08
INSTRUM       spect
PROBHD        5 mm PABBO BB-
PULPROG       zgpg30
TD            65536
SOLVENT       MeOD
NS            512
DS            4
SWH           24038.461 Hz
FIDRES        0.366798 Hz
AQ            1.3621988 sec
RG            203
DW            20.800 usec
DE            6.50 usec
TE            296.2 K
D1            2.00000000 sec
D11           0.02000000 sec
TDO           1

===== CHANNEL f1 =====
NUC1          13C
P1            9.50 usec
PL1           -1.00 dB
PL1W          44.90424265 W
SF01          100.6228298 MHz

===== CHANNEL f2 =====
CPDPRG2       waltz16
NUC2          1H
PCPD2         80.00 usec
PL2           -2.00 dB
PL12          14.33 dB
PL13          18.33 dB
PL2W          14.809588652 W
PL12W         0.34478071 W
PL13W         0.13725966 W
SFO2          400.1316005 MHz
SI            32768
SF            100.6127690 MHz
WDW           EM
SSB           0
LB            1.00 Hz
GB            0
PC            1.40
  
```

S9. HPLC chromatogram of 6c

# NIPER

## Sample Information

Acquired by : Chhuttan . Meena  
Sample Name : NP-1896  
Sample ID : NP-1896  
Tray# : 1  
Vial# : 7  
Injection Volume : 10 uL  
Data Filename : NP-1896.lcd  
Method Filename : 70%-B-PLOT-15 MIN.lcm  
Batch Filename : 30.9.12B2.lcb  
Report Filename : sunil C-18.lcr  
Date Acquired : 9/30/2012 6:20:25 PM  
Data Processed : 10/1/2012 2:06:00 PM  
Column : RP-18  
Flow Rate : 1.0 mL/min

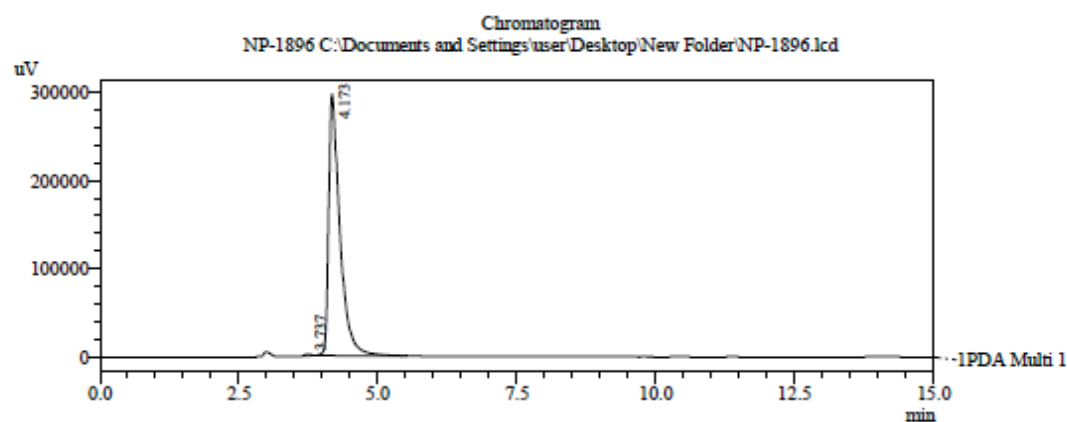

PeakTable

PDA Ch1 254nm 4nm

| Peak# | Ret. Time | Area    | Height | Area %  |
|-------|-----------|---------|--------|---------|
| 1     | 3.737     | 10005   | 1658   | 0.238   |
| 2     | 4.173     | 4190242 | 296170 | 99.762  |
| Total |           | 4200247 | 297827 | 100.000 |

# S10. <sup>1</sup>H-NMR Spectrum of 6d

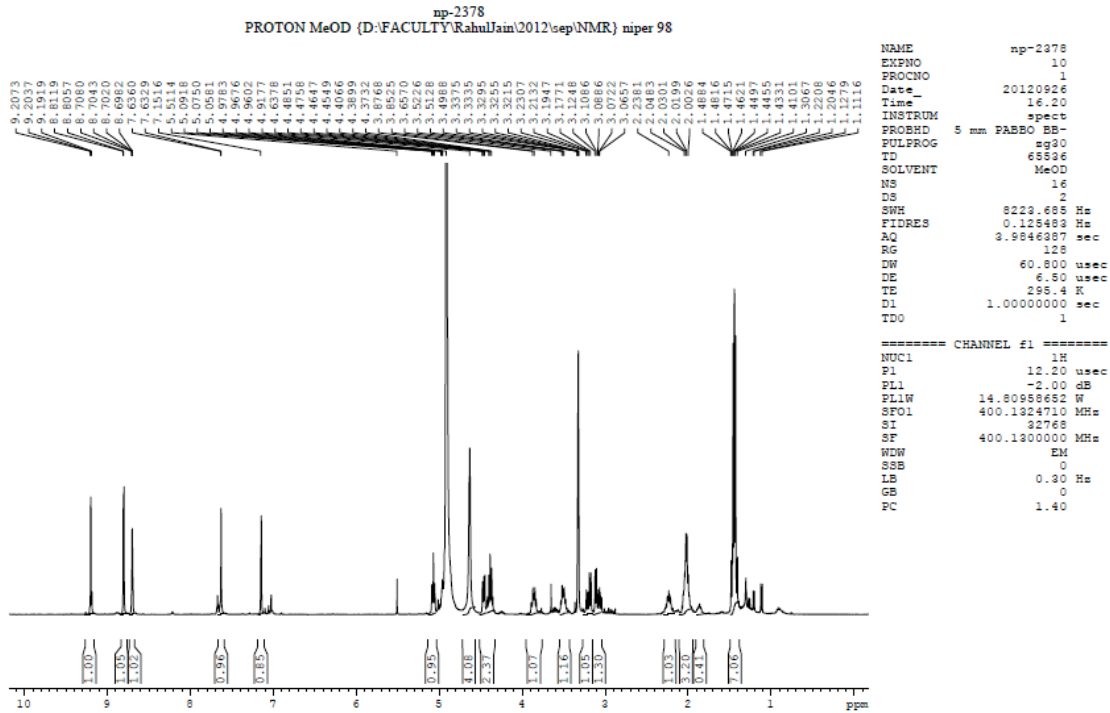

# S11. <sup>13</sup>C-NMR Spectrum of 6d

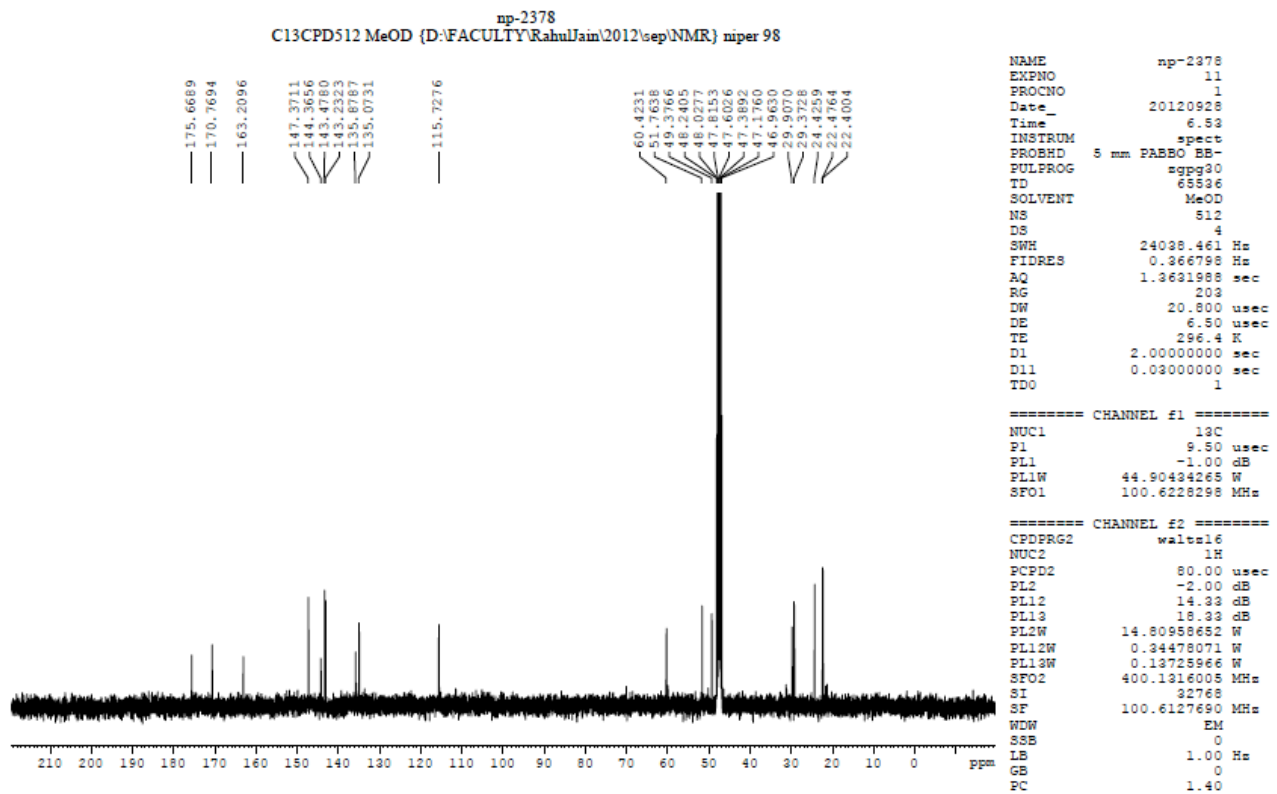

## S12. HPLC chromatogram of 6d

# NIPER

### Sample Information

Acquired by : cHHUTTAN I. mEENA  
Sample Name : NP-2378  
Sample ID : NP-2378  
Tray# : 1  
Vial# : 1  
Injection Volume : 10 uL  
Data Filename : NP-2378.lcd  
Method Filename : 70%-B-PLOT-15 MIN.lcm  
Batch Filename : 30.9.12B9.lcb  
Report Filename : sunil C-18.lcr  
Date Acquired : 10/1/2012 1:00:07 AM  
Data Processed : 10/1/2012 2:23:15 PM  
Column : RP-18  
Flow Rate : 1.0 mL/min

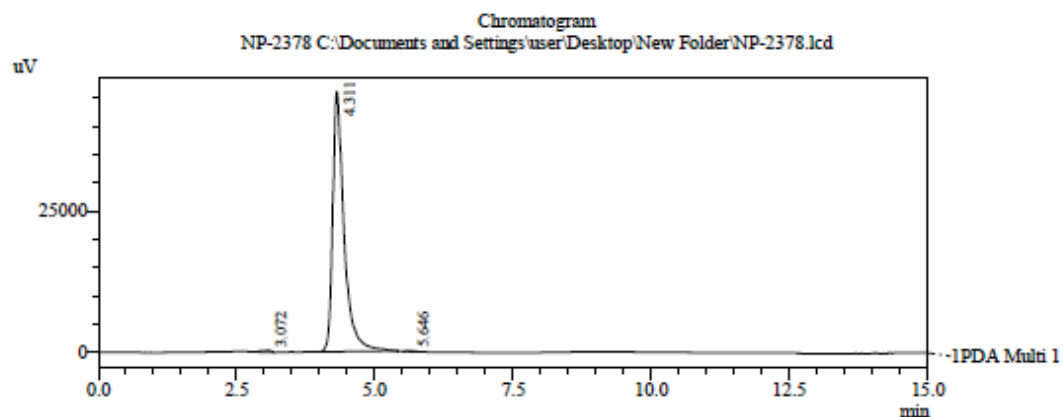

PeakTable

PDA Ch1 254nm 4nm

| Peak# | Ret. Time | Area   | Height | Area %  |
|-------|-----------|--------|--------|---------|
| 1     | 3.072     | 4225   | 374    | 0.632   |
| 2     | 4.311     | 662891 | 45992  | 99.226  |
| 3     | 5.646     | 942    | 109    | 0.141   |
| Total |           | 668058 | 46475  | 100.000 |

### S13. <sup>1</sup>H-NMR Spectrum of 6e

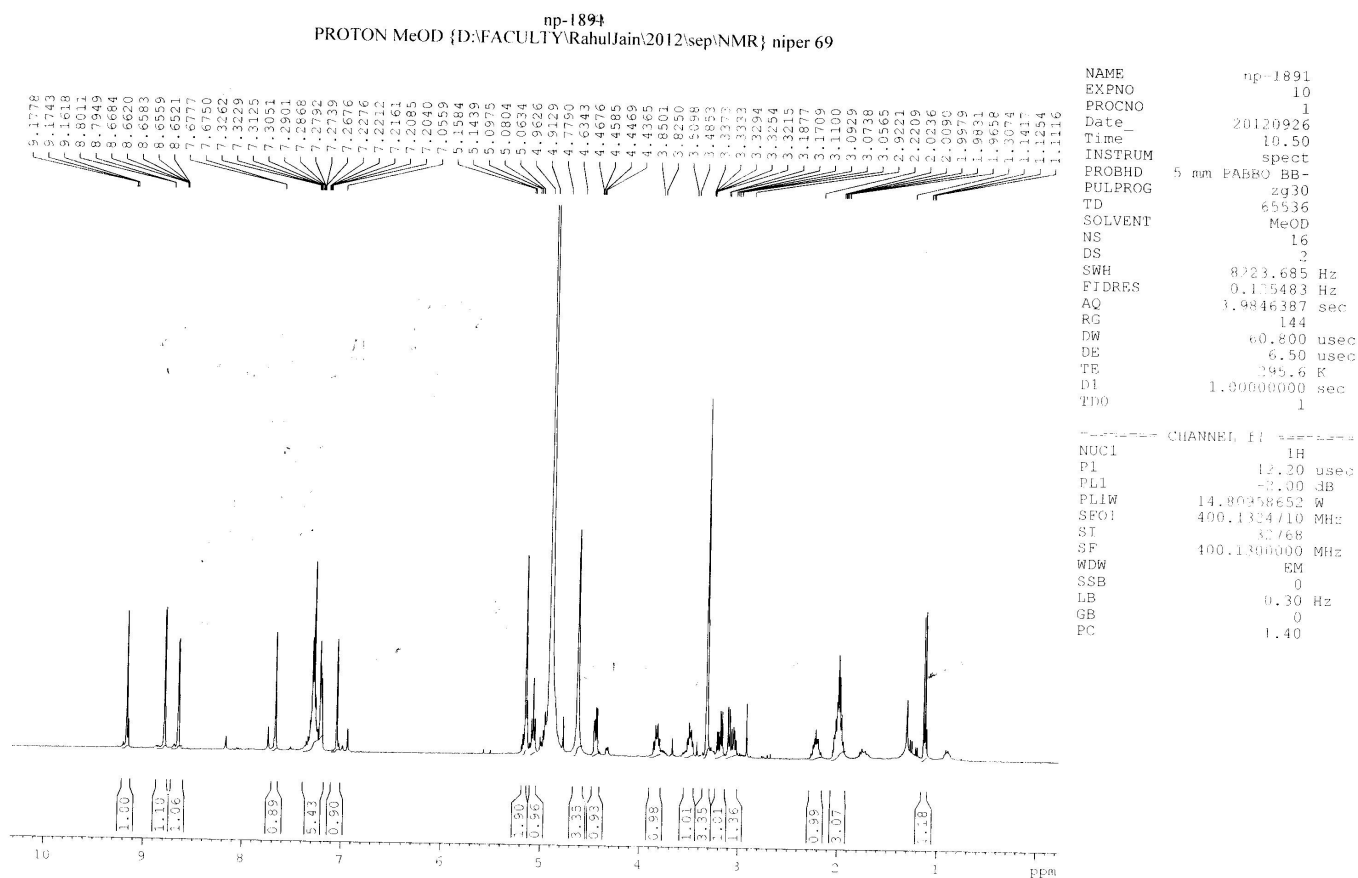

### S14. <sup>13</sup>C-NMR Spectrum of 6e

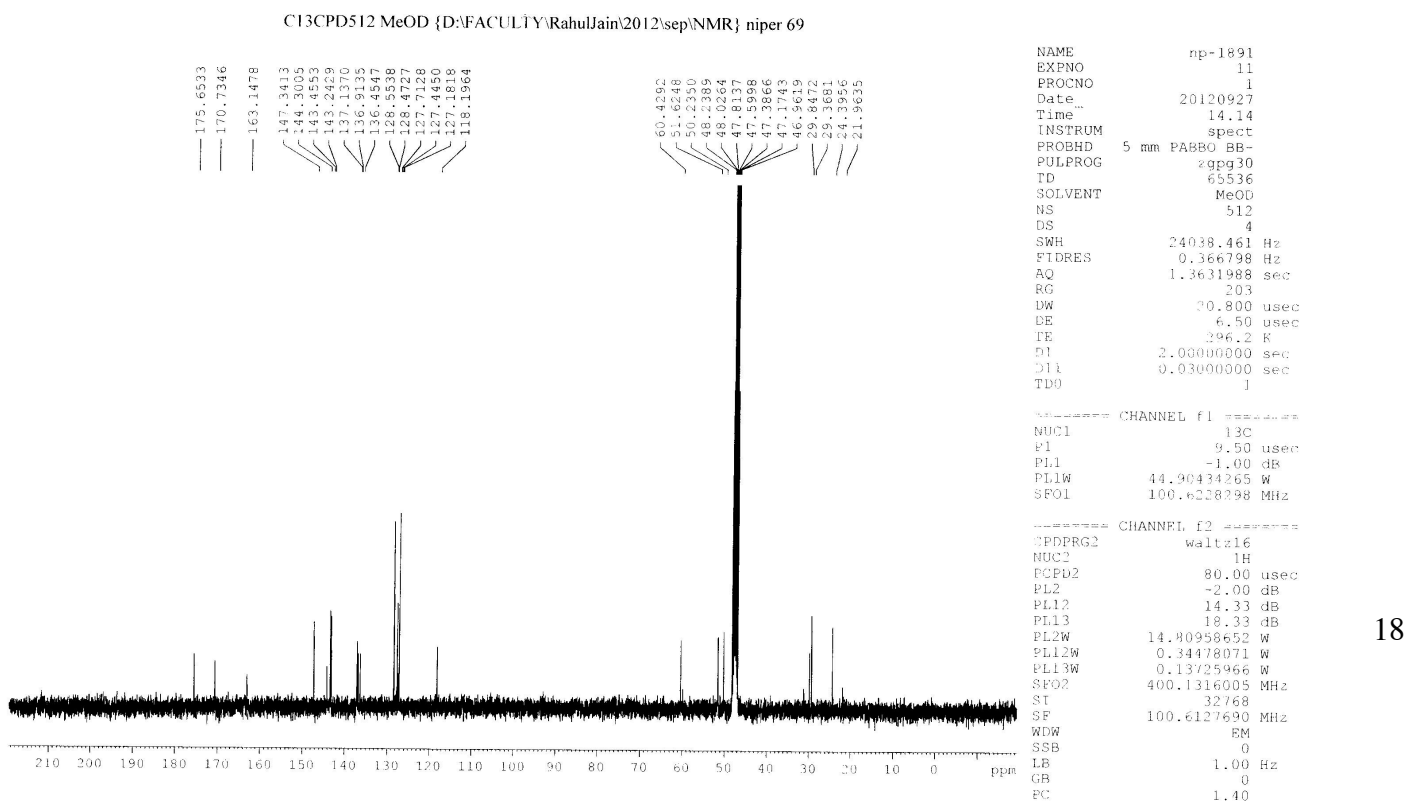

# S15. HPLC chromatogram of 6e

## NIPER

### Sample Information

Acquired by : Chhuttan L. Meena  
Sample Name : NP-1894  
Sample ID : NP-1894  
Tray# : 1  
Vial# : 8  
Injection Volume : 10 uL  
Data Filename : NP-1894.lcd  
Method Filename : 70%-B-PLOT-15 MIN.lcm  
Batch Filename : 30.9.12B2.lcb  
Report Filename : sumil C-18.lcr  
Date Acquired : 9/30/2012 6:35:58 PM  
Data Processed : 10/1/2012 2:05:16 PM  
Column : RP-18  
Flow Rate : 1.0 mL/min

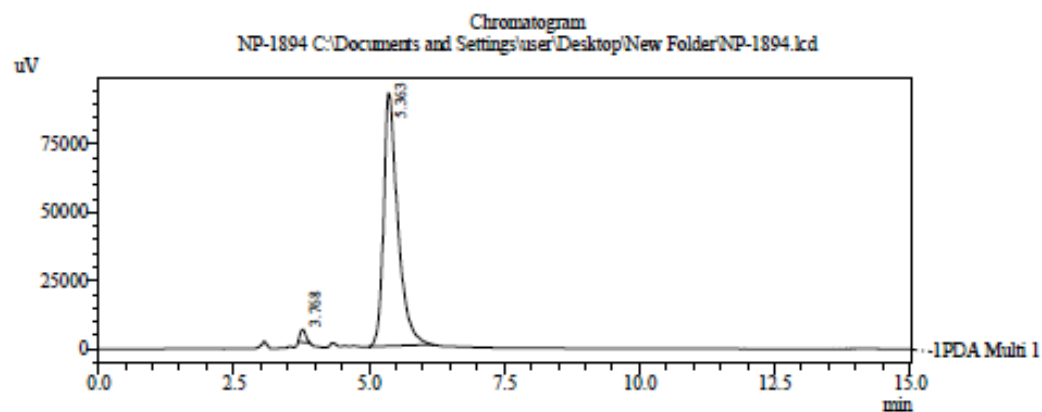

1 PDA Multi 1 / 254nm 4nm

PeakTable

PDA Ch1 254nm 4nm

| Peak# | Ret. Time | Area    | Height | Area %  |
|-------|-----------|---------|--------|---------|
| 1     | 3.768     | 33318   | 4701   | 1.928   |
| 2     | 5.363     | 1694644 | 92717  | 98.072  |
| Total |           | 1727962 | 97418  | 100.000 |

# S16. <sup>1</sup>H-NMR Spectrum of 6f

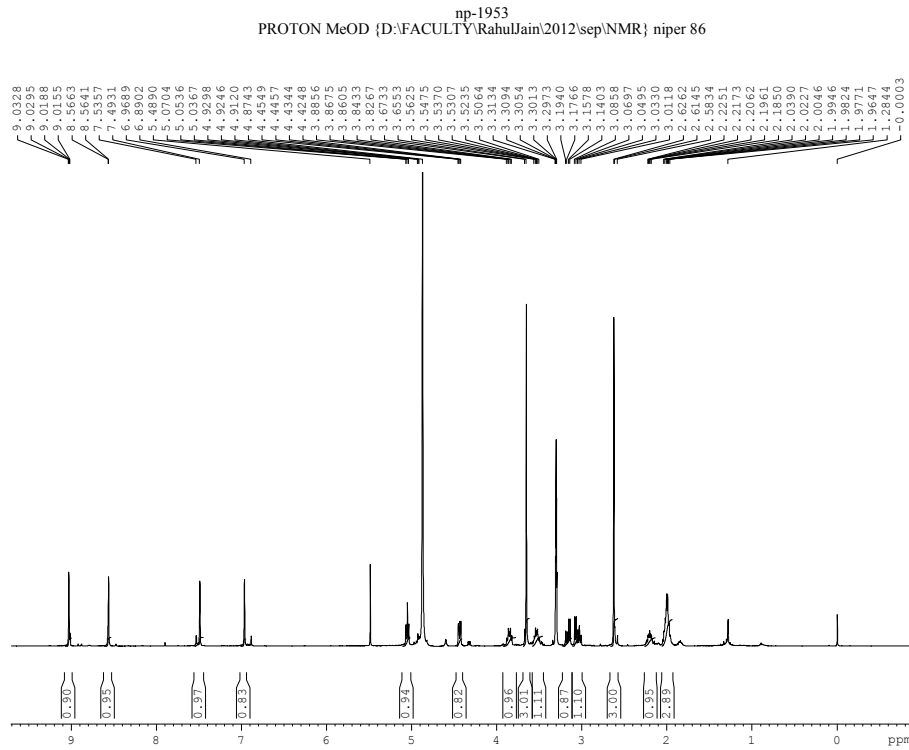

```
NAME np-1953
EXPNO 1
PROCNO 1
Date_ 20120929
Time 1.31
INSTRUM spect
PROBHD 5 mm PABBO BB-
PULPROG zg30
TD 65536
SOLVENT MeOD
NS 16
DS 2
SWH 8223.685 Hz
FIDRES 0.125483 Hz
AQ 3.9846387 sec
RG 203
DW 60.800 usec
DE 6.50 usec
TE 295.7 K
D1 1.00000000 sec
D11 1
TD0 1

===== CHANNEL f1 =====
NUC1 1H
P1 12.20 usec
PL1 -2.00 dB
PL1W 14.80958652 W
SFO1 400.1324710 MHz
SI 32768
SF 400.1300098 MHz
WDW EM
SSB 0
LB 0.30 Hz
GB 0
PC 1.40
```

# S17. <sup>13</sup>C-NMR Spectrum of 6f

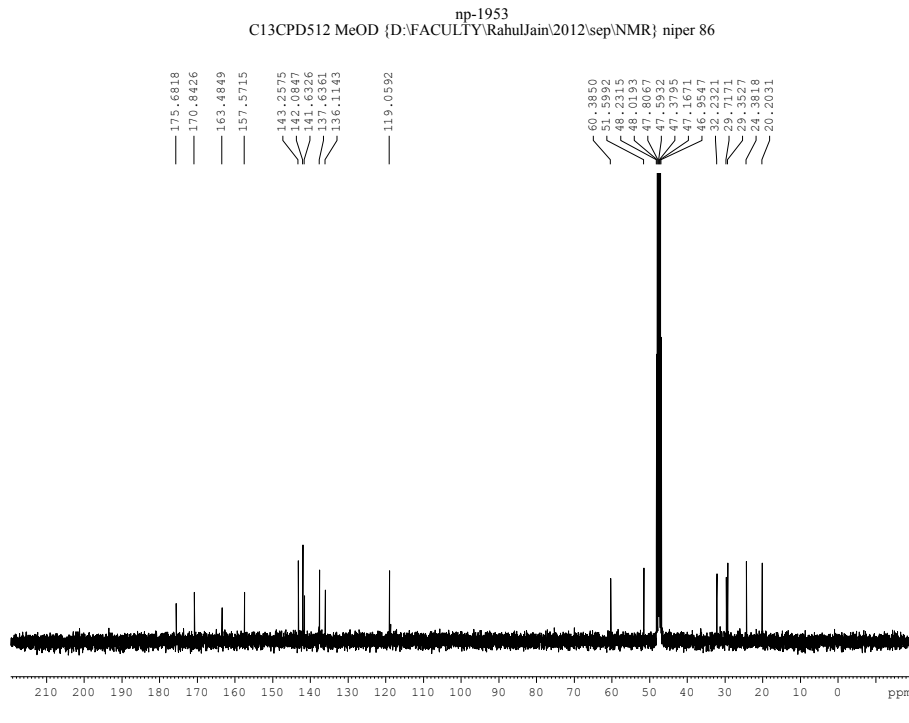

```
NAME np-1953
EXPNO 11
PROCNO 1
Date_ 20120929
Time 2.01
INSTRUM spect
PROBHD 5 mm PABBO BB-
PULPROG zgpg30
TD 65536
SOLVENT MeOD
NS 512
DS 4
SWH 24038.461 Hz
FIDRES 0.366798 Hz
AQ 1.3631988 sec
RG 203
DW 20.800 usec
DE 6.50 usec
TE 296.3 K
D1 2.00000000 sec
D11 0.03000000 sec
TD0 1

===== CHANNEL f1 =====
NUC1 13C
P1 9.50 usec
PL1 -1.00 dB
PL1W 44.90434265 W
SFO1 100.6228298 MHz

===== CHANNEL f2 =====
CPDPRG2 waltz16
NUC2 1H
PCPD2 80.00 usec
PL2 -2.00 dB
PL12 14.33 dB
PL13 18.33 dB
PL2W 14.80958652 W
PL12W 0.34478071 W
PL13W 0.13725966 W
SFO2 400.1316005 MHz
SI 32768
SF 100.6127690 MHz
WDW EM
SSB 0
LB 1.00 Hz
GB 0
PC 1.40
```



## S18. HPLC chromatogram of 6f

### NIPER

#### Sample Information

Acquired by : SCHhuttan L. Meena  
 Sample Name : DBT  
 Sample ID : DBT  
 Tray# : 1  
 Vial# : 9  
 Injection Volume : 10 uL  
 Data Filename : DBT.lcd  
 Method Filename : 70%-B-PLOT-15 MIN.lcm  
 Batch Filename : 30.9.12B9.lcb  
 Report Filename : sumil C-18.lcr  
 Date Acquired : 10/1/2012 3:04:14 AM  
 Data Processed : 10/1/2012 2:03:05 PM  
 Column : RP-18  
 Flow Rate : 1.0 mL/min

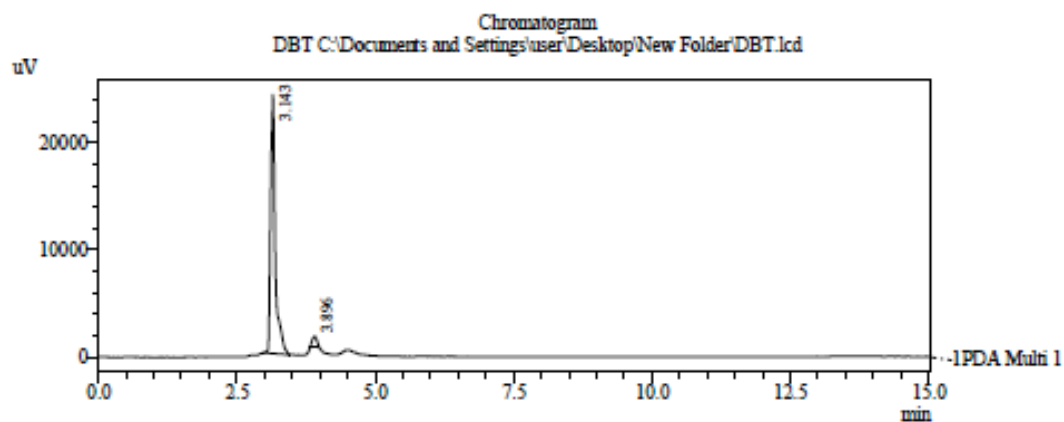

PeakTable

PDA Ch1 254nm 4nm

| Peak# | Ret. Time | Area   | Height | Area %  |
|-------|-----------|--------|--------|---------|
| 1     | 3.143     | 139763 | 24096  | 96.302  |
| 2     | 3.896     | 5367   | 937    | 3.698   |
| Total |           | 145130 | 25033  | 100.000 |

# S19. <sup>1</sup>H-NMR Spectrum of 6g

cm-93  
PROTON CDC13 {D:\DEC08} niper 43

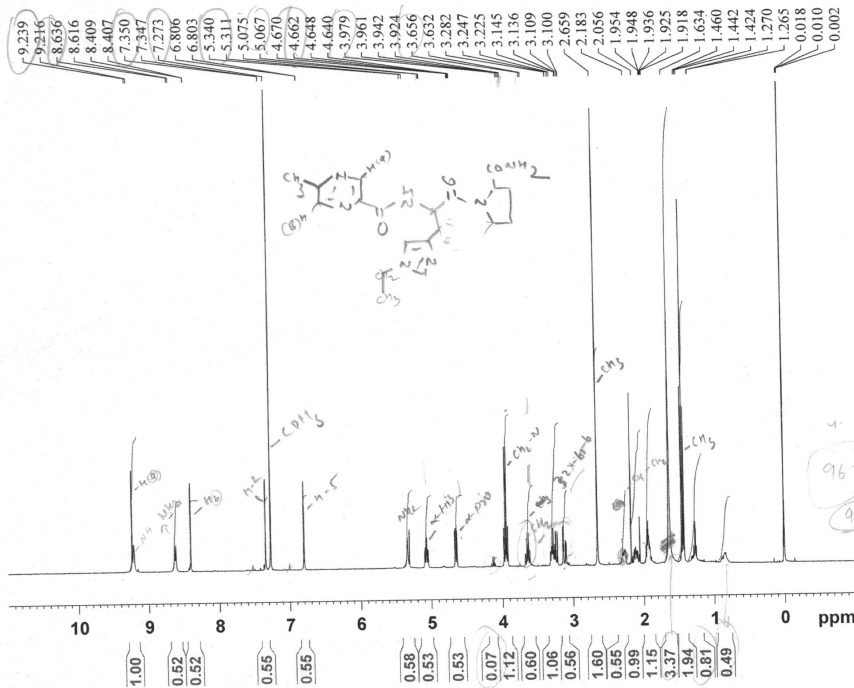

```
NAME cm-93
EXPNO 10
PROCNO 1
Date_ 20081206
Time 23.10
INSTRUM spect
PROBHD 5 mm PABBO BB-
PULPROG zg30
TD 65536
SOLVENT CDCl3
NS 16
DS 2
SWH 8223.685 Hz
FIDRES 0.125483 Hz
AQ 3.9846387 sec
RG 203
DW 60.800 usec
DE 6.50 usec
TE 297.5 K
D1 1.00000000 sec
TDO 1
===== CHANNEL f1 =====
NUC1 1H
P1 12.20 usec
PL1 -2.00 dB
PL1W 14.80958652 W
SFO1 400.1324710 MHz
SI 32768
SF 400.1300000 MHz
WDW EM
SSB 0
LB 0.30 Hz
GB 0
PC 1.40
```

# S20. <sup>13</sup>C-NMR Spectrum of 6g

cm-93  
C13CPD CDC13 {D:\DEC08} niper 43

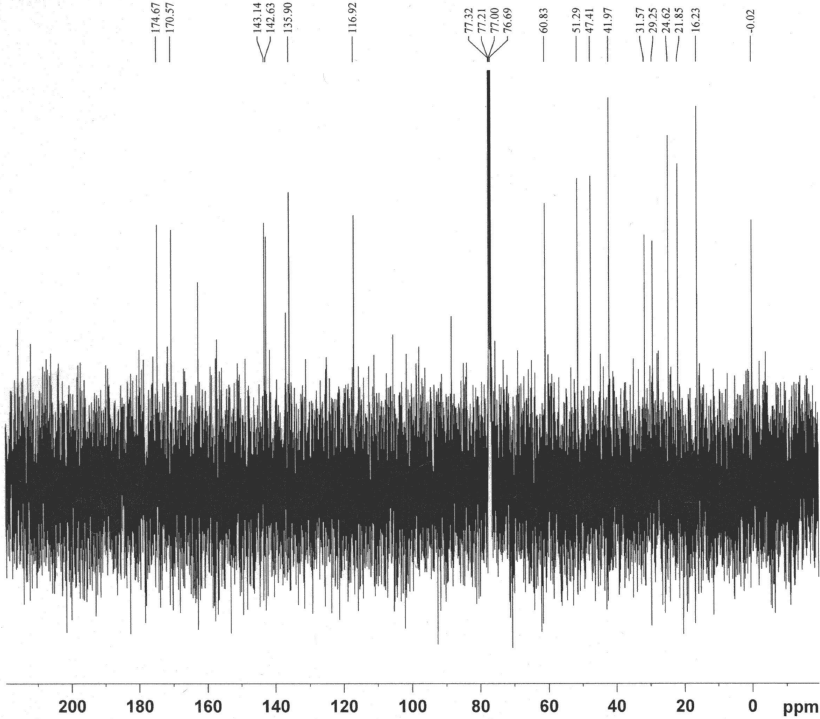

```
NAME cm-93
EXPNO 11
PROCNO 1
Date_ 20081206
Time 23.39
INSTRUM spect
PROBHD 5 mm PABBO BB-
PULPROG zgpg30
TD 65536
SOLVENT CDCl3
NS 512
DS 4
SWH 24038.461 Hz
FIDRES 0.366798 Hz
AQ 1.3631988 sec
RG 203
DW 20.800 usec
DE 6.50 usec
TE 298.2 K
D1 2.00000000 sec
D11 0.03000000 sec
TDO 1
===== CHANNEL f1 =====
NUC1 13C
P1 9.50 usec
PL1 -1.00 dB
PL1W 44.90434265 W
SFO1 100.6228298 MHz
===== CHANNEL f2 =====
CPDPRG2 waltz16
NUC2 1H
PCPD2 80.00 usec
PL2 -2.00 dB
PL12 14.33 dB
PL13 18.33 dB
PL2W 14.80958652 W
PL12W 0.34478071 W
PL13W 0.13725966 W
SFO2 400.1316005 MHz
SI 32768
SF 100.6127690 MHz
WDW EM
SSB 0
LB 1.00 Hz
GB 0
PC 1.40
```

## S21. HPLC chromatogram of 6g

# NIPER

### Sample Information

Acquired by : chluttan  
Sample Name : NP-1952  
Sample ID : NP-1952  
Tray# : 1  
Vial# : 8  
Injection Volume : 10  $\mu$ L  
Data Filename : NP-1952.lcd  
Method Filename : 70%-B-PLOT-15 MIN.lcm  
Batch Filename : 30.9.12B9.lcb  
Report Filename : sunil C-18.lcr  
Date Acquired : 10/1/2012 2:48:46 AM  
Data Processed : 10/1/2012 2:08:21 PM  
Column : RP-18  
Flow Rate : 1.0 mL/min

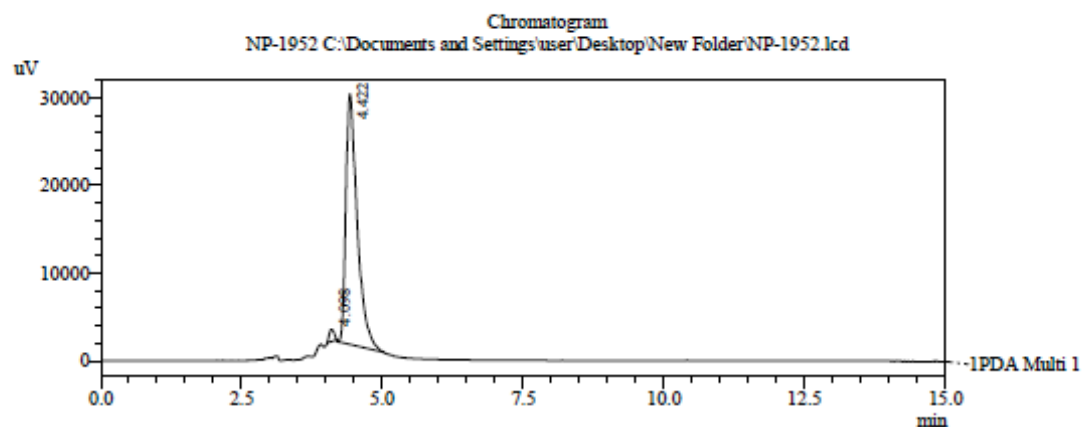

PeakTable

PDA Ch1 254nm 4nm

| Peak# | Ret. Time | Area   | Height | Area %  |
|-------|-----------|--------|--------|---------|
| 1     | 4.098     | 8404   | 1367   | 2.059   |
| 2     | 4.422     | 399858 | 28497  | 97.941  |
| Total |           | 408263 | 29865  | 100.000 |

## S22. <sup>1</sup>H-NMR Spectrum of 6h

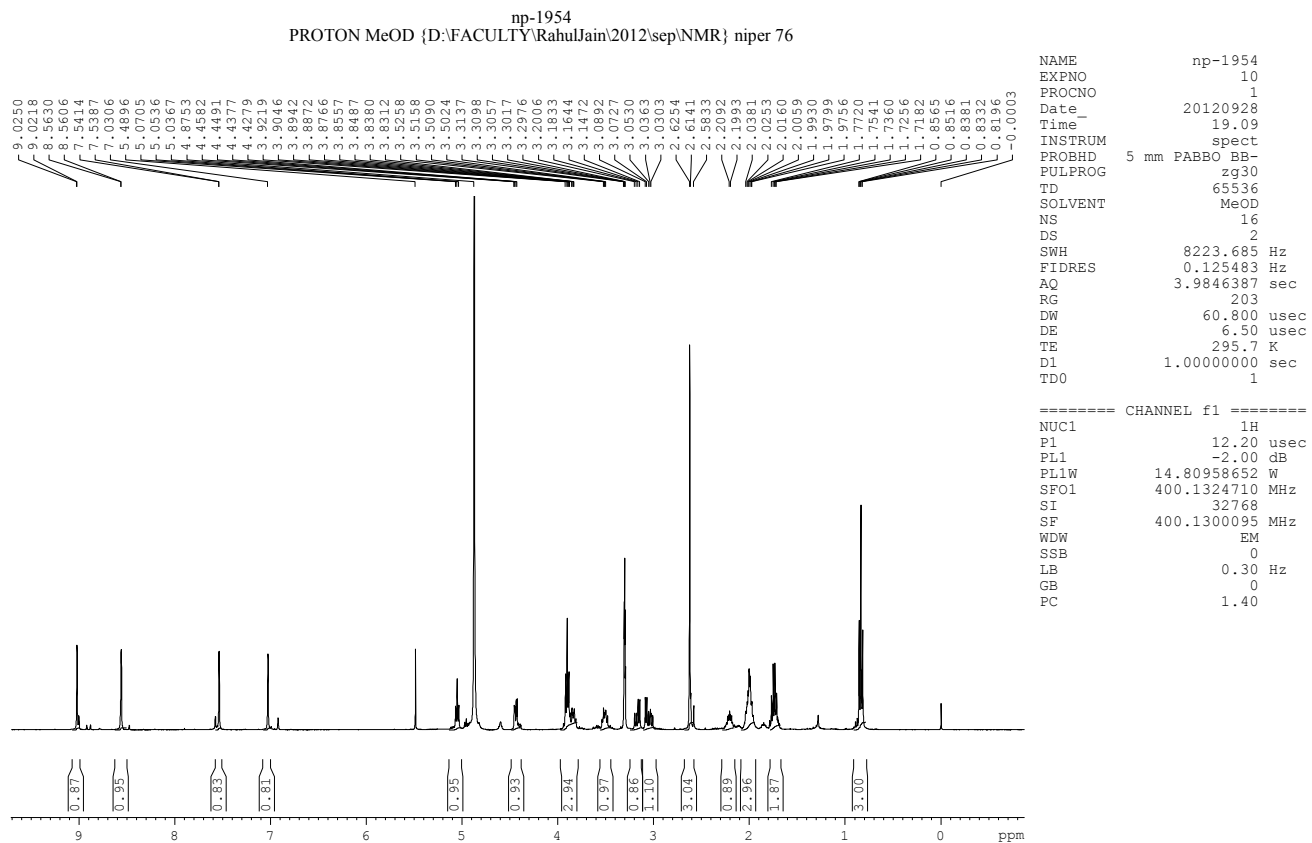

## S23. <sup>13</sup>C-NMR Spectrum of 6h

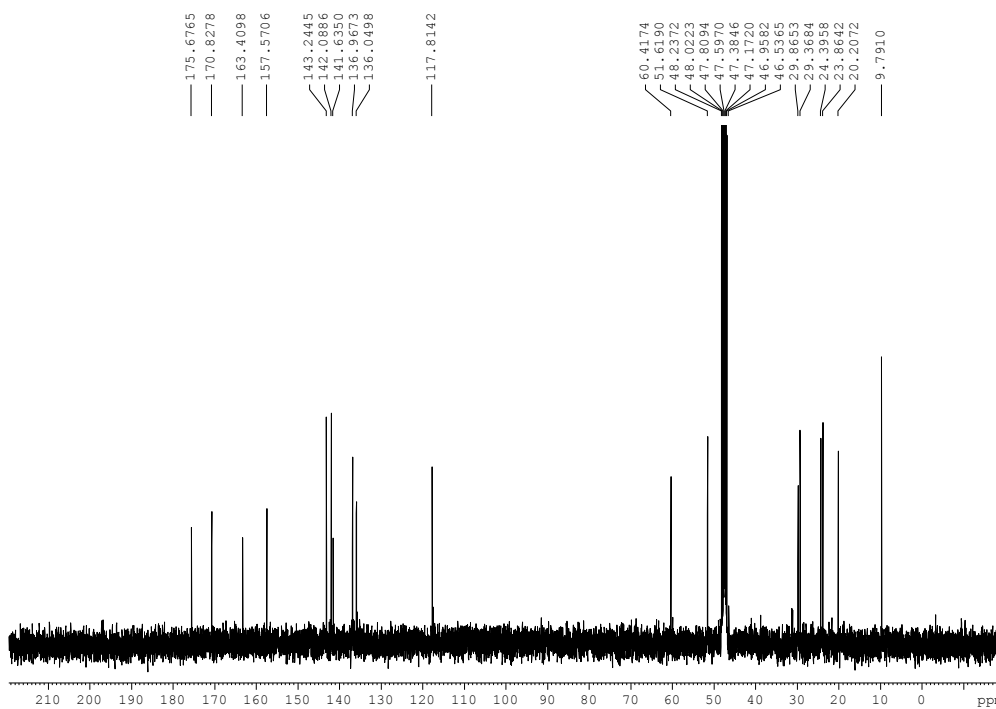

```

NAME          np-1954
EXPNO         11
PROCNO        1
Date_         20120928
Time_         19.39
INSTRUM       spect
PROBHD        5 mm PABBO BB-
PULPROG       zgpg30
TD            65536
SOLVENT       MeOD
NS            512
DS            4
SWH           24038.461 Hz
FIDRES        0.366798 Hz
AQ            1.3631988 sec
RG            203
DW            20.800 usec
DE            6.50 usec
TE            296.3 K
D1            2.00000000 sec
D11           0.03000000 sec
TD0           1

===== CHANNEL f1 =====
NUC1           13C
P1             9.50 usec
PL1            -1.00 dB
PL1W           44.90434265 W
SFO1           100.6228298 MHz

===== CHANNEL f2 =====
CPDPRG2       waltz16
NUC2           1H
PCPD2         80.00 usec
PL2            -2.00 dB
PL12           14.33 dB
PL13           18.33 dB
PL2W           14.80958652 W
PL12W          0.34478071 W
PL13W          0.13725966 W
SFO2           400.1316005 MHz
SI            32768
SF            100.6127690 MHz
WDW            EM
SSB            0
LB            1.00 Hz
GB            0
PC            1.40
    
```

**S24. HRMS Spectrum of 6h**

# Mass Spectrum List Report

**Analysis Info**

Analysis Name D:\Data\Rahul jain\12-09-05-NP-1954.d  
 Method sodium formate tune\_low.m  
 Sample Name NP-1954  
 Comment

Acquisition Date 9/5/2012 2:25:06 PM

Operator VIKAS GROVER  
 Instrument / Ser# maXis 40

**Acquisition Parameter**

|             |            |                       |           |                  |           |
|-------------|------------|-----------------------|-----------|------------------|-----------|
| Source Type | ESI        | Ion Polarity          | Positive  | Set Nebulizer    | 5.0 Bar   |
| Focus       | Not active | Set Capillary         | 4500 V    | Set Dry Heater   | 180 °C    |
| Scan Begin  | 50 m/z     | Set End Plate Offset  | -500 V    | Set Dry Gas      | 5.0 l/min |
| Scan End    | 600 m/z    | Set Collision Cell RF | 300.0 Vpp | Set Divert Valve | Source    |

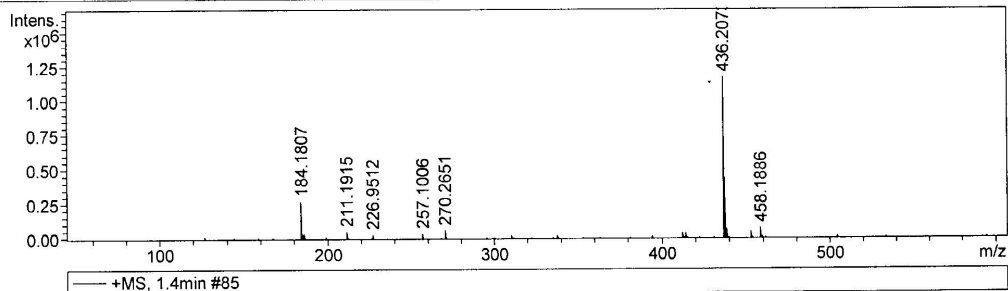

| #  | m/z      | Res.  | S/N    | I       | FWHM   |
|----|----------|-------|--------|---------|--------|
| 1  | 184.1807 | 18490 | 3037.5 | 275348  | 0.0100 |
| 2  | 211.1915 | 19027 | 602.3  | 57808   | 0.0111 |
| 3  | 226.9512 | 19466 | 339.7  | 31904   | 0.0117 |
| 4  | 257.1006 | 20457 | 427.6  | 39693   | 0.0126 |
| 5  | 270.2651 | 20327 | 647.8  | 63873   | 0.0133 |
| 6  | 436.2073 | 17178 | 5938.2 | 1168376 | 0.0254 |
| 7  | 437.2094 | 20672 | 2226.2 | 441534  | 0.0211 |
| 8  | 438.2118 | 21621 | 346.4  | 67969   | 0.0203 |
| 9  | 452.1807 | 22482 | 267.9  | 44575   | 0.0201 |
| 10 | 458.1886 | 21800 | 495.3  | 76065   | 0.0210 |

*Peak: 436.2073*  
*Peak: 437.2094*

# S25. <sup>1</sup>H-NMR Spectrum of 6i

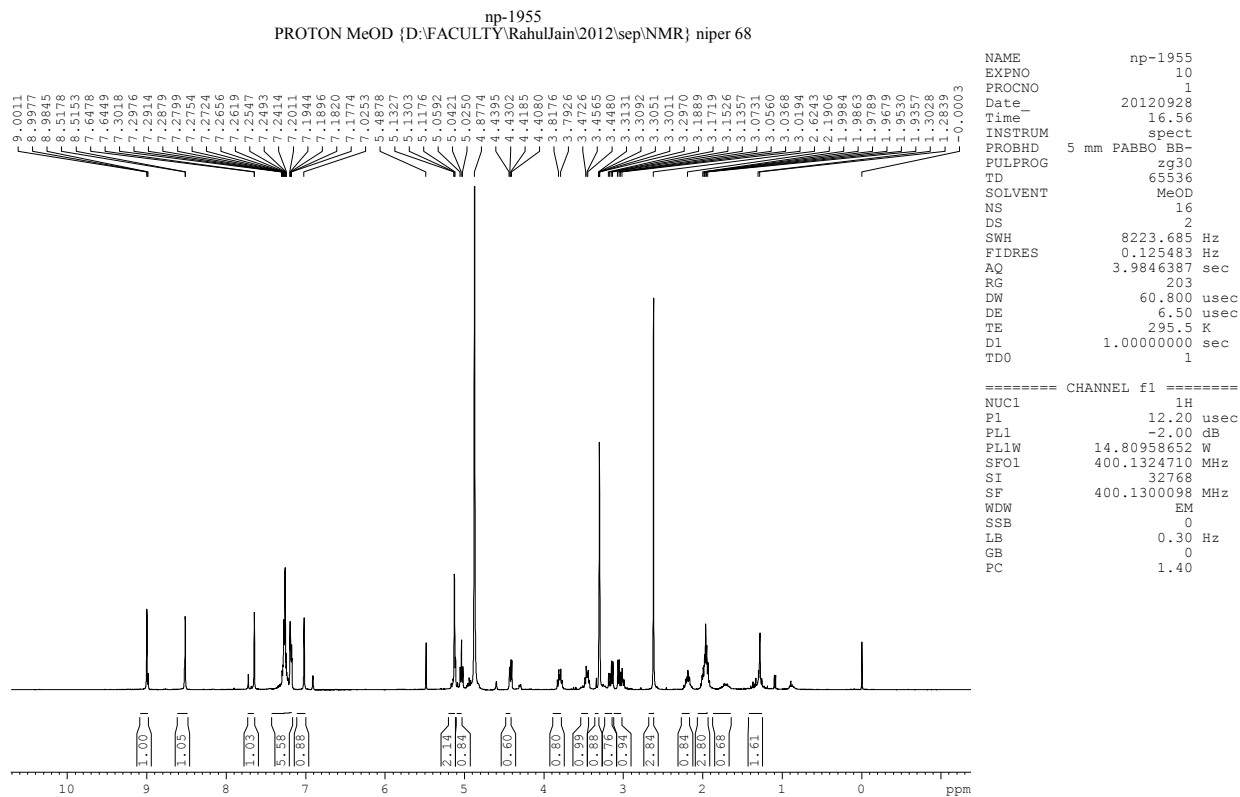

# S26. <sup>13</sup>C-NMR Spectrum of 6i

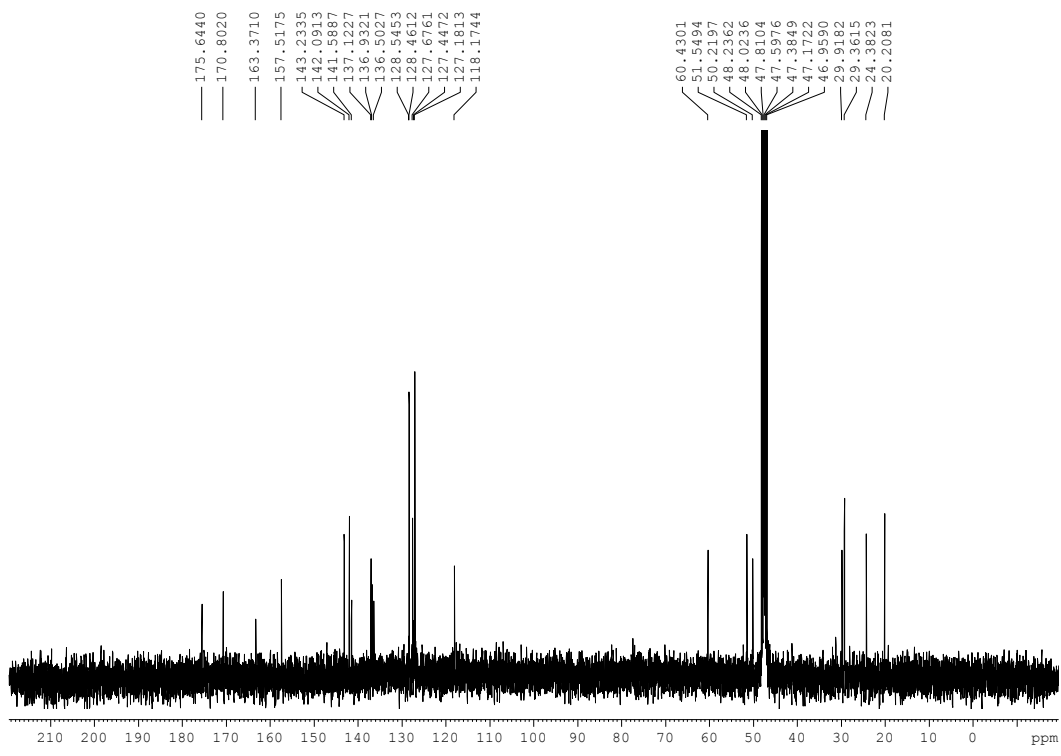

```

NAME          np-1955
EXPNO         11
PROCNO        1
Date_         20121001
Time          20.41
INSTRUM       spect
PROBHD        5 mm PABBO BB-
PULPROG       zgpg30
TD            65536
SOLVENT       MeOD
NS            512
DS            4
SWH           24038.461 Hz
FIDRES        0.366798 Hz
AQ            1.3631988 sec
RG            203
DW            20.800 usec
DE            6.50 usec
TE            296.2 K
D1            2.00000000 sec
D11           0.03000000 sec
TD0           1

===== CHANNEL f1 =====
NUC1           13C
P1             9.50 usec
PL1            -1.00 dB
PL1W           44.90434265 W
SFO1           100.6228298 MHz

===== CHANNEL f2 =====
CPDPRG2       waltz16
NUC2           1H
PCPD2          80.00 usec
PL2            -2.00 dB
PL12           14.33 dB
PL13           18.33 dB
PL2W           14.80958652 W
PL12W          0.34478071 W
PL13W          0.13725966 W
SFO2           400.1316005 MHz
SI            32768
SF            100.6127690 MHz
WDW            EM
SSB            0
LB            1.00 Hz
GB            0
PC            1.40
    
```

**S27. HRMS Spectrum of 6i**



# Mass Spectrum List Report

**Analysis Info**

Analysis Name D:\Data\Rahul jain\12-09-05-NP-1955.d  
 Method sodium formate tune\_low.m  
 Sample Name NP-1955  
 Comment

Acquisition Date 9/5/2012 1:45:11 PM

Operator VIKAS GROVER  
 Instrument / Ser# maXis 40

**Acquisition Parameter**

|             |            |                       |           |                  |           |
|-------------|------------|-----------------------|-----------|------------------|-----------|
| Source Type | ESI        | Ion Polarity          | Positive  | Set Nebulizer    | 5.0 Bar   |
| Focus       | Not active | Set Capillary         | 4500 V    | Set Dry Heater   | 180 °C    |
| Scan Begin  | 50 m/z     | Set End Plate Offset  | -500 V    | Set Dry Gas      | 5.0 l/min |
| Scan End    | 600 m/z    | Set Collision Cell RF | 300.0 Vpp | Set Divert Valve | Source    |

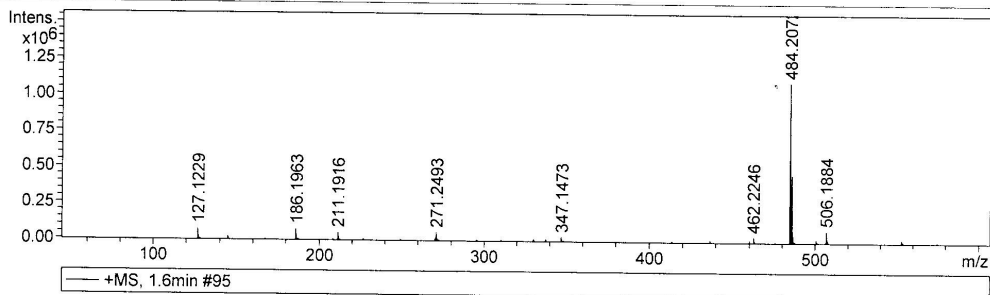

| #  | m/z      | Res.  | S/N    | I       | FWHM   |
|----|----------|-------|--------|---------|--------|
| 1  | 127.1229 | 17232 | 917.7  | 75235   | 0.0074 |
| 2  | 186.1963 | 17699 | 897.1  | 73929   | 0.0105 |
| 3  | 211.1916 | 18556 | 620.1  | 52791   | 0.0114 |
| 4  | 257.1003 | 20027 | 35.0   | 3232    | 0.0128 |
| 5  | 271.2493 | 20704 | 592.0  | 55640   | 0.0131 |
| 6  | 330.1420 | 21411 | 141.1  | 12543   | 0.0154 |
| 7  | 337.3074 | 21057 | 134.8  | 12181   | 0.0160 |
| 8  | 347.1473 | 22362 | 288.6  | 26628   | 0.0155 |
| 9  | 462.2246 | 22398 | 222.5  | 33613   | 0.0206 |
| 10 | 484.2072 | 17916 | 6885.6 | 1096984 | 0.0270 |
| 11 | 485.2094 | 21283 | 2927.9 | 461309  | 0.0228 |
| 12 | 486.2120 | 22361 | 503.2  | 78397   | 0.0217 |
| 13 | 506.1884 | 22942 | 665.1  | 80277   | 0.0221 |

## S28. <sup>1</sup>H-NMR Spectrum of 6j

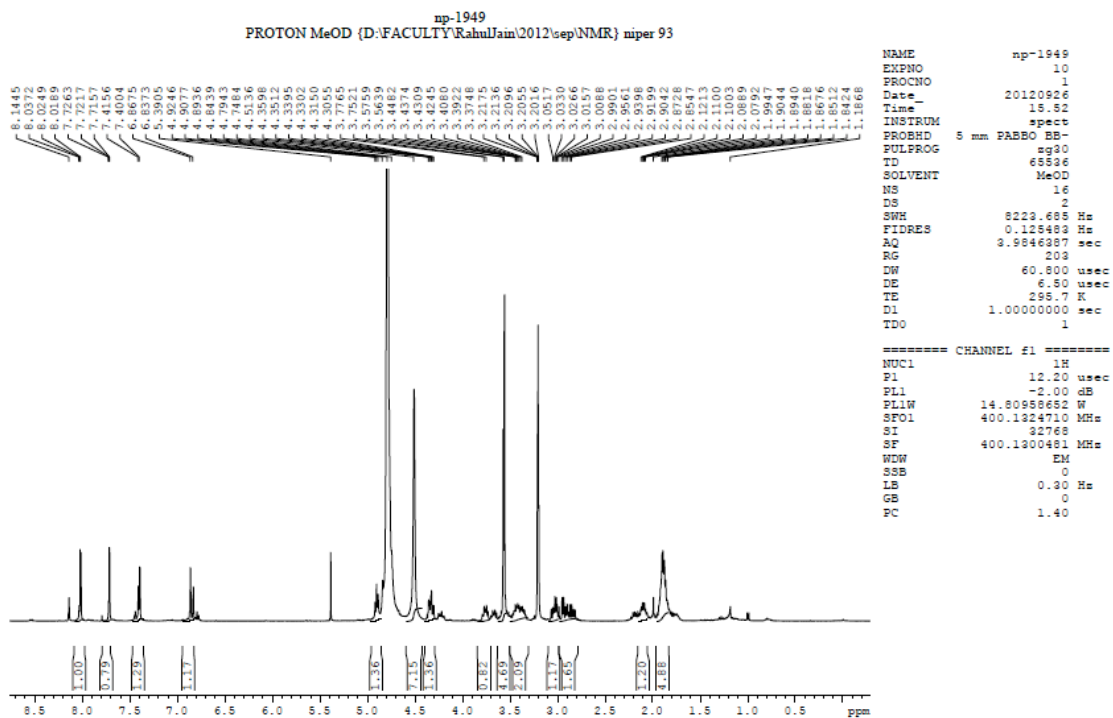

## S29. <sup>13</sup>C-NMR Spectrum of 6j

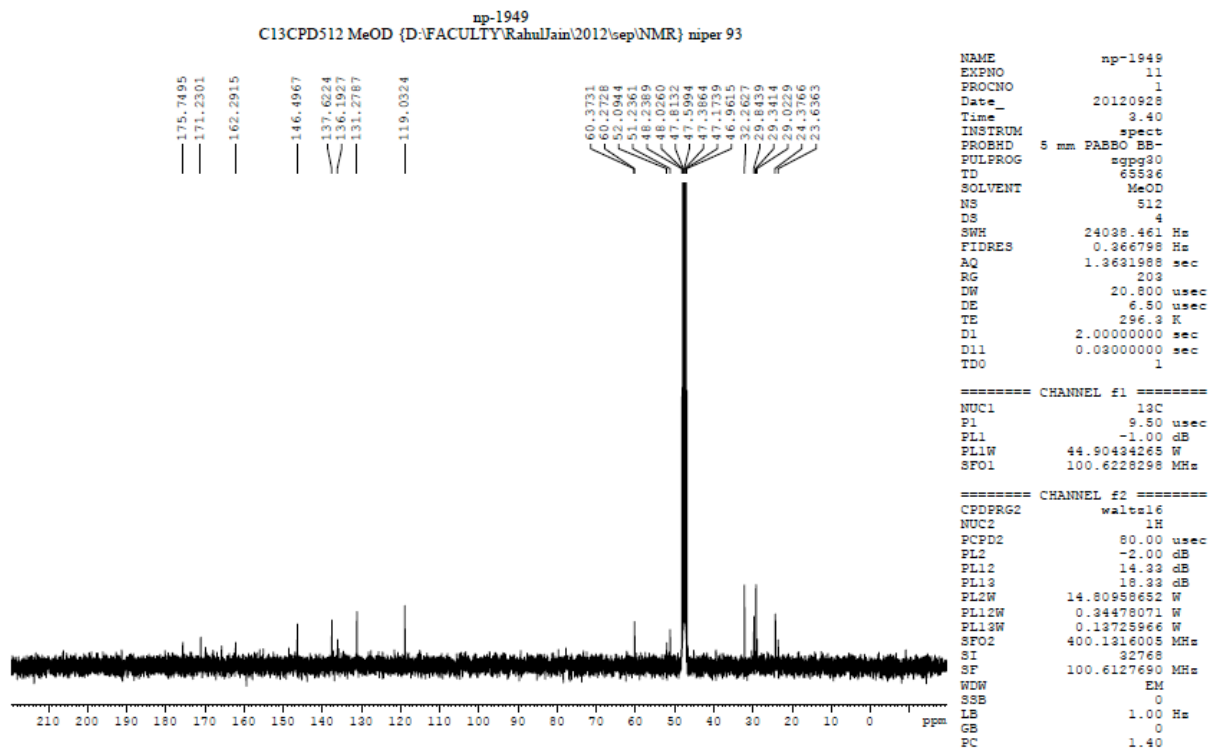

### S30. HPLC chromatogram of 6j

## NIPER

#### Sample Information

Acquired by : Chhuttan L. Meena  
Sample Name : NP-1855  
Sample ID : NP-1855  
Tray# : 1  
Vial# : 2  
Injection Volume : 10  $\mu$ L  
Data Filename : NP-1855.lcd  
Method Filename : 70%-B-PLOT-15 MIN.lcm  
Batch Filename : 30.9.12B2.lcb  
Report Filename : sunil C-18.lcr  
Date Acquired : 9/30/2012 5:02:53 PM  
Data Processed : 10/1/2012 2:03:42 PM  
Column : RP-18  
Flow Rate : 1.0 mL/min

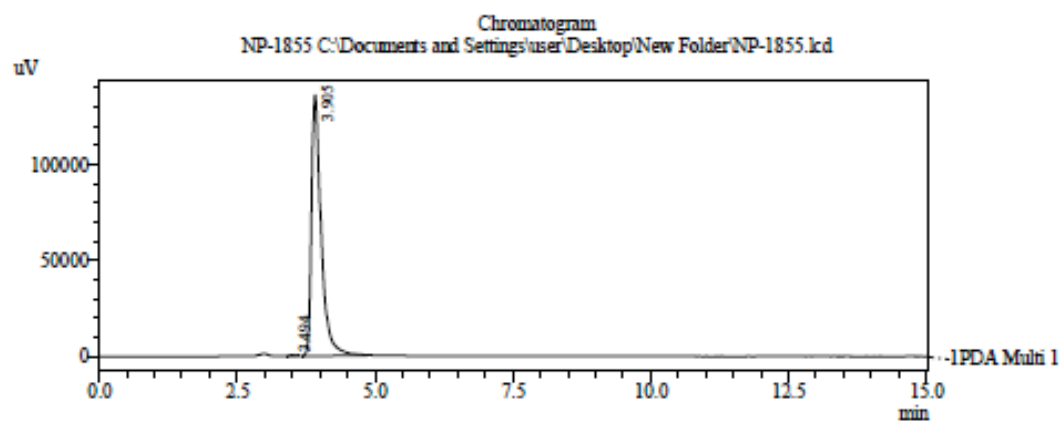

#### PeakTable

PDA Ch1 254nm 4nm

| Peak# | Ret. Time | Area    | Height | Area %  |
|-------|-----------|---------|--------|---------|
| 1     | 3.494     | 1976    | 324    | 0.119   |
| 2     | 3.905     | 1660177 | 135567 | 99.881  |
| Total |           | 1662152 | 135892 | 100.000 |

### S31. <sup>1</sup>H-NMR Spectrum of 6k

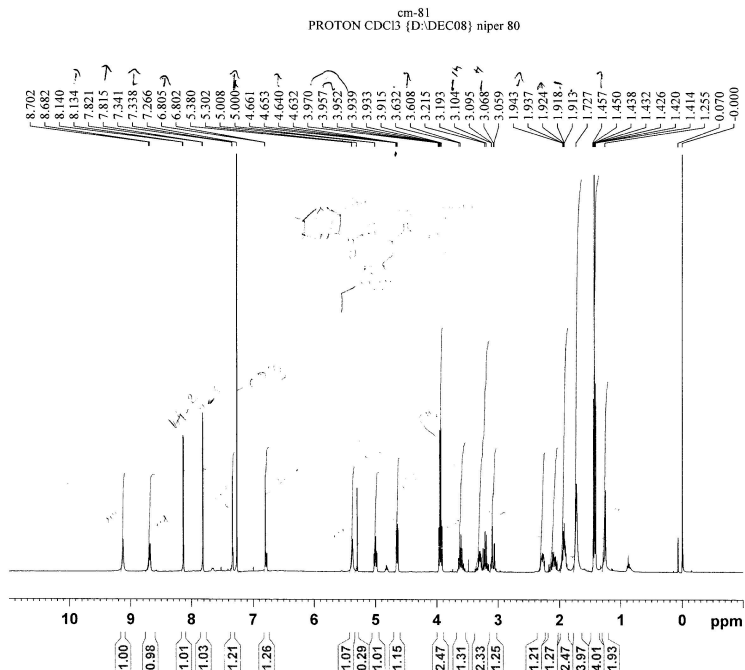

```

NAME          cm-81
EXPNO         10
PROCNO        1
Date_         20081210
Time         7.00
INSTRUM       spect
PROBHD        5 mm PABBO BB-
PULPROG       zg30
TD            65536
SOLVENT       CDC13
NS            16
DS            2
SWH           8223.685 Hz
FIDRES        0.125483 Hz
AQ            3.9846387 sec
RG            203
DW            60.800 usec
DE            6.50 usec
TE            297.2 K
D1            1.00000000 sec
TDO           1

===== CHANNEL f1 =====
NUC1           1H
P1             12.20 usec
PL1            -2.00 dB
PL1W          14.80958652 W
SFO1          400.1324710 MHz
SI            32768
SF            400.1300031 MHz
WDW           EM
SSB           0
LB            0.30 Hz
GB            0
PC            1.40
    
```

### S32. <sup>13</sup>C NMR spectrum of 6k

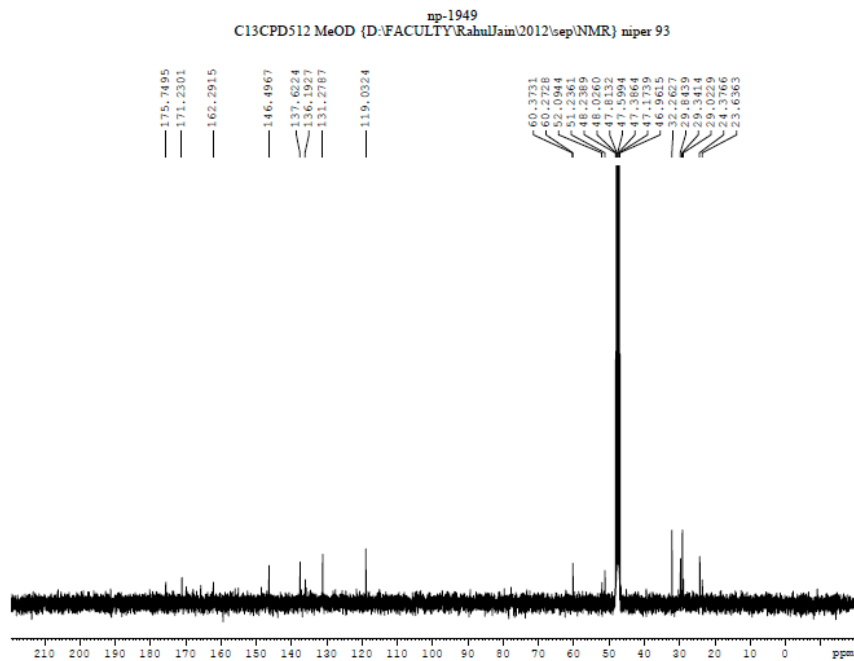

```

NAME          np-1949
EXPNO         11
PROCNO        1
Date_         20120828
Time         3.40
INSTRUM       spect
PROBHD        5 mm PABBO BB-
PULPROG       zgpg30
TD            65526
SOLVENT       MeOD
NS            512
DS            4
SWH           24038.461 Hz
FIDRES        0.366798 Hz
AQ            1.3621988 sec
RG            203
DW            20.800 usec
DE            6.50 usec
TE            296.3 K
D1            2.00000000 sec
D11           0.03000000 sec
TDO           1

===== CHANNEL f1 =====
NUC1           13C
P1             9.50 usec
PL1            -1.00 dB
PL1W          44.90494265 W
SFO1          100.6228298 MHz

===== CHANNEL f2 =====
CPDPRG2       waltz16
NUC2           1H
PCPD2         80.00 usec
PL2            -2.00 dB
PL12          14.33 dB
PL13          15.33 dB
PL2W          14.80958652 W
PL12W         0.34478071 W
PL13W         0.13725966 W
SFO2          400.1316005 MHz
SI            32768
SF            100.6127690 MHz
WDW           EM
SSB           0
LB            1.00 Hz
GB            0
PC            1.40
    
```

### S33. HPLC chromatogram of 6k

## NIPER

#### Sample Information

Acquired by : CLM  
Sample Name : 1948  
Sample ID : 1948  
Tray# : 1  
Vial# : 24  
Injection Volume : 10 uL  
Data Filename : 1948.lcd  
Method Filename : 70%-B-PLOT-15 MIN.lcm  
Batch Filename : 30.9.12B9.lcb  
Report Filename : sumil C-18.lcr  
Date Acquired : 10/1/2012 6:57:03 AM  
Data Processed : 10/1/2012 12:18:14 PM  
Column : RP-18  
Flow Rate : 1.0 mL/min

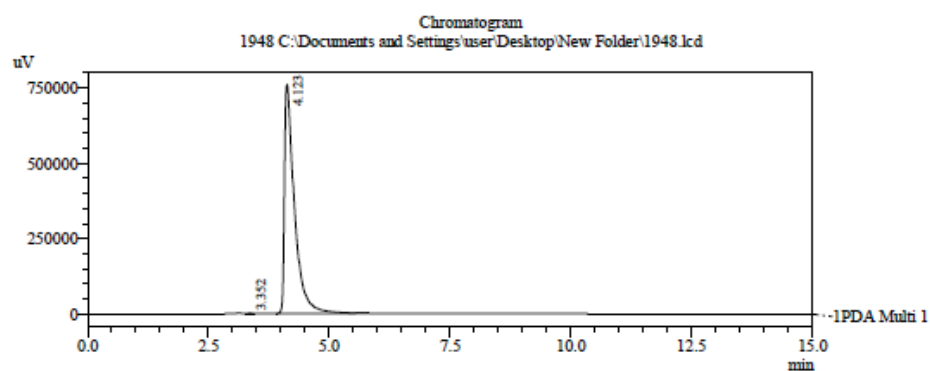

PeakTable

PDA Ch1 254nm 4nm

| Peak# | Ret. Time | Area     | Height | Area %  |
|-------|-----------|----------|--------|---------|
| 1     | 3.352     | 4836     | 802    | 0.044   |
| 2     | 4.123     | 10948132 | 759238 | 99.956  |
| Total |           | 10952968 | 760041 | 100.000 |

### S34. <sup>1</sup>H-NMR Spectrum of 6l

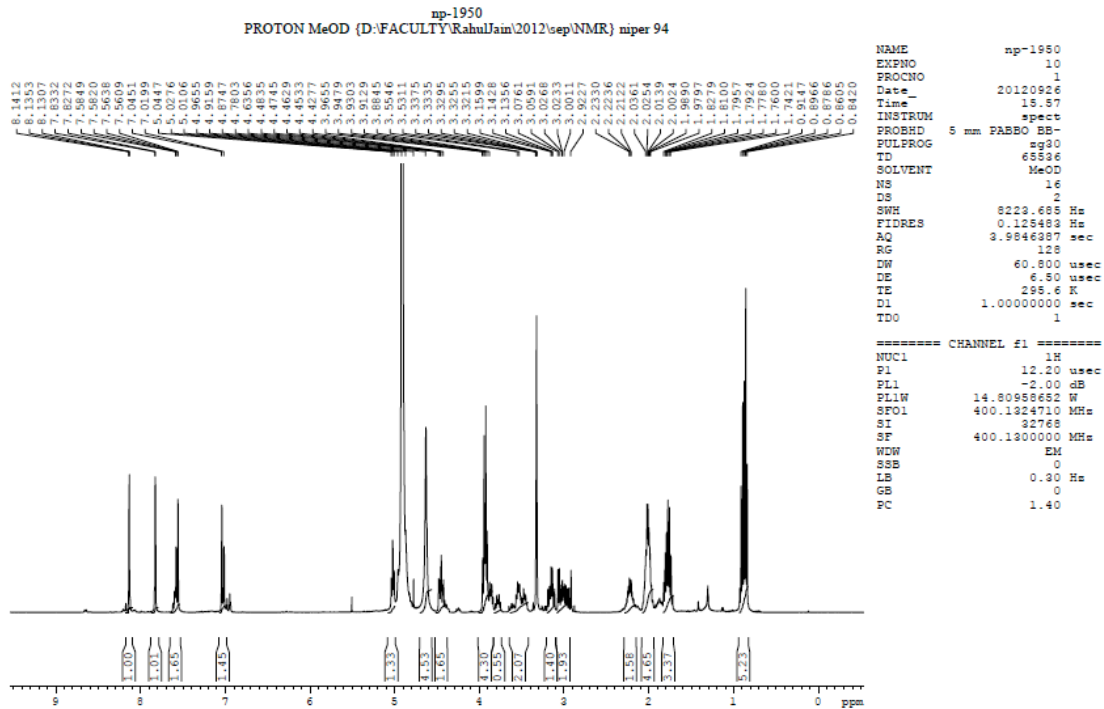

### S35. <sup>13</sup>C-NMR Spectrum of 6l

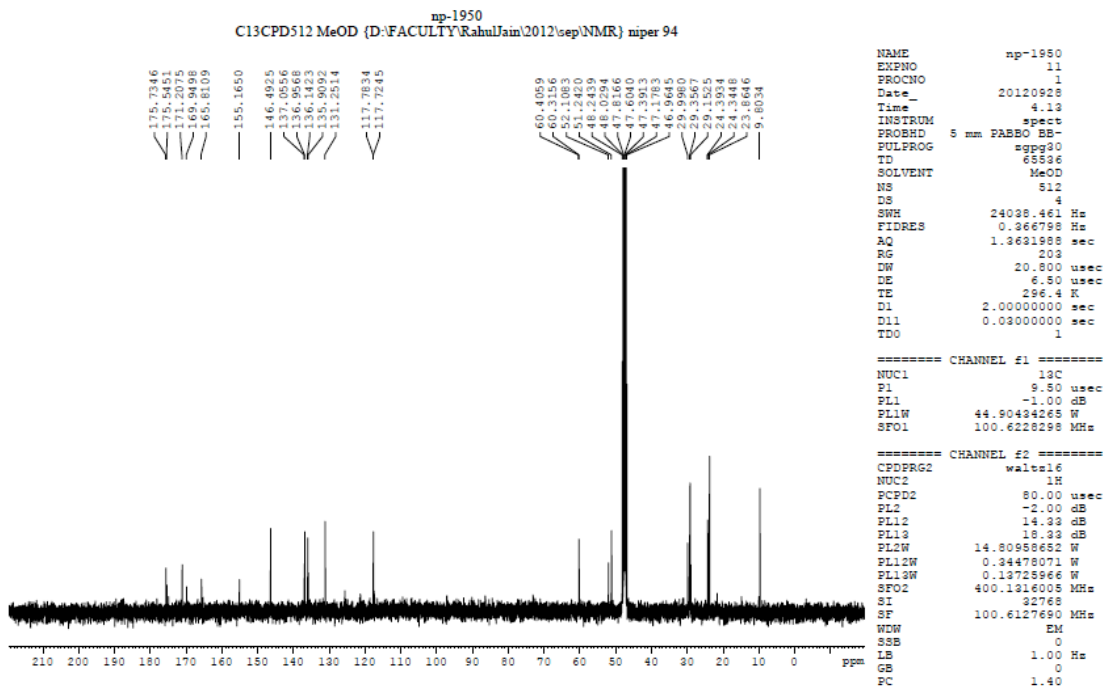

### S36. HPLC chromatogram of 6l

## NIPER

#### Sample Information

Acquired by : Chhuttan L.Meena  
 Sample Name : NP-1950  
 Sample ID : NP-1950  
 Tray# : 1  
 Vial# : 9  
 Injection Volume : 10 uL  
 Data Filename : NP-1950.lcd  
 Method Filename : 70%-B-PLOT-15 MIN.lcm  
 Batch Filename : 30.9.12B2.lcb  
 Report Filename : sumil C-18.lcr  
 Date Acquired : 9/30/2012 6:51:27 PM  
 Data Processed : 10/1/2012 2:07:25 PM  
 Column : RP-18  
 Flow Rate : 1.0 mL/min

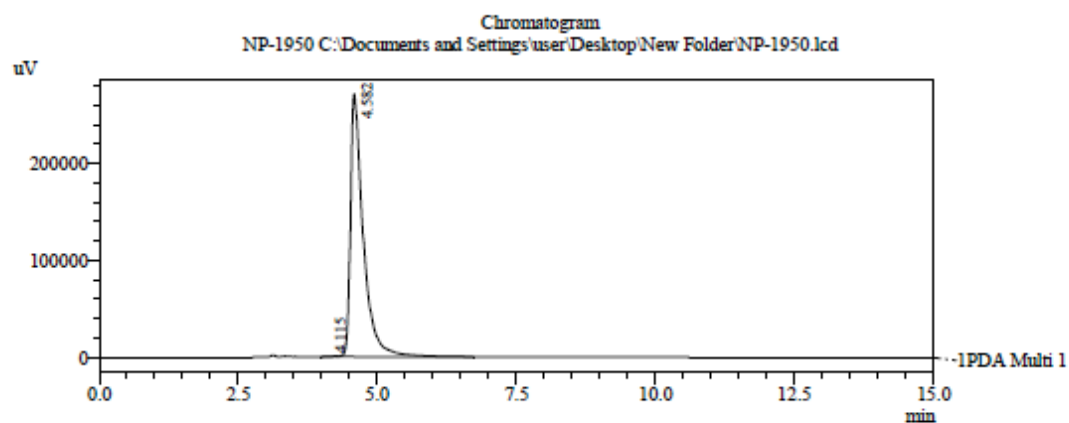

PeakTable

PDA Ch1 254nm 4nm

| Peak# | Ret. Time | Area    | Height | Area %  |
|-------|-----------|---------|--------|---------|
| 1     | 4.115     | 3194    | 416    | 0.074   |
| 2     | 4.582     | 4334056 | 270930 | 99.926  |
| Total |           | 4337250 | 271346 | 100.000 |

### S37. <sup>1</sup>H-NMR Spectrum of 6m

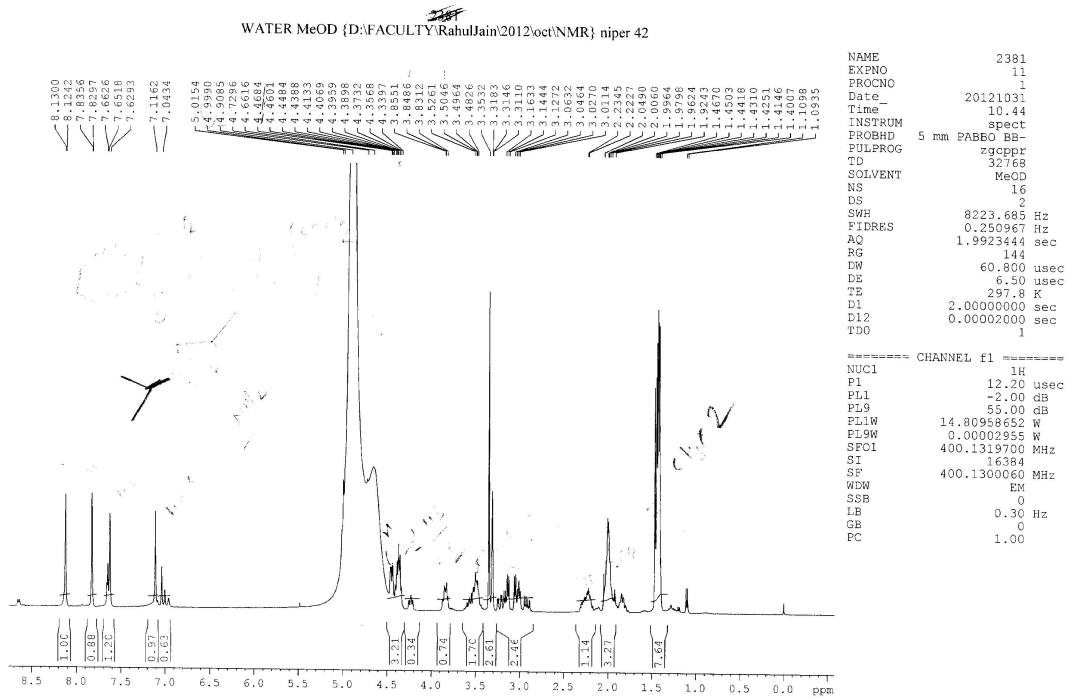

### S38. <sup>13</sup>C-NMR Spectrum of 6m

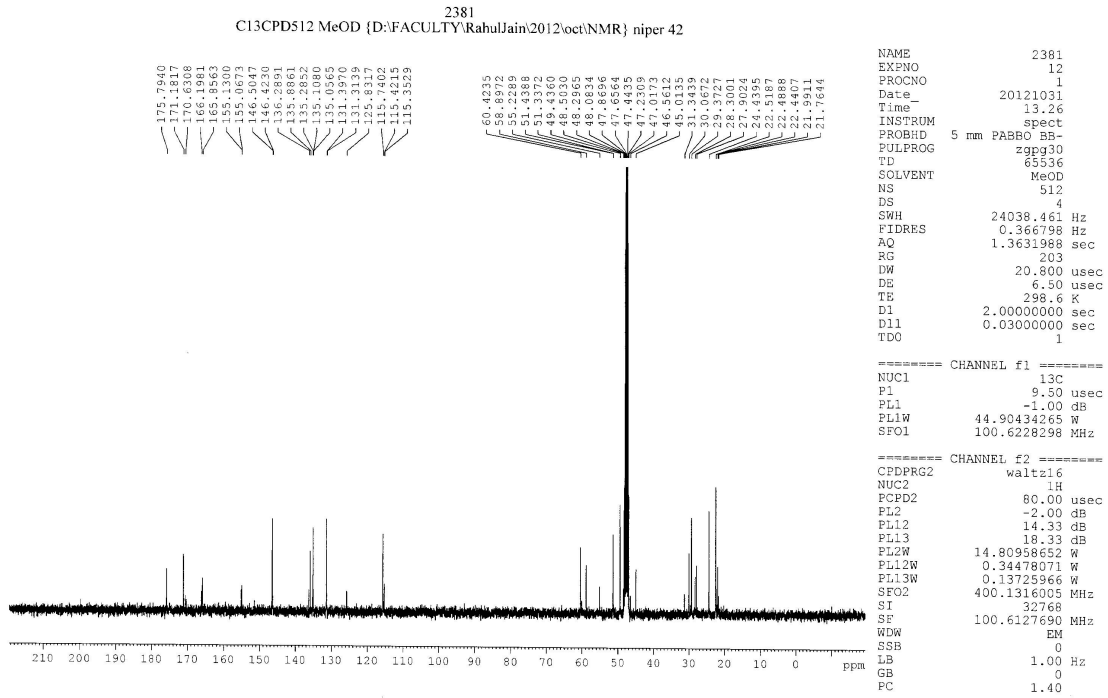



### S39. HPLC chromatogram of 6m

## NIPER

#### Sample Information

Acquired by : Chhuttan L. Meena  
Sample Name : 2381  
Sample ID : 2381  
Tray# : 1  
Vial# : 19  
Injection Volume : 10  $\mu$ L  
Data Filename : 2381.lcd  
Method Filename : 70%-B-PLOT-15 MIN.lcm  
Batch Filename : 30.9.12B9.lcb  
Report Filename : sunil C-18.lcr  
Date Acquired : 10/1/2012 5:39:26 AM  
Data Processed : 10/1/2012 2:00:37 PM  
Column : RP-18  
Flow Rate : 1.0 mL/min

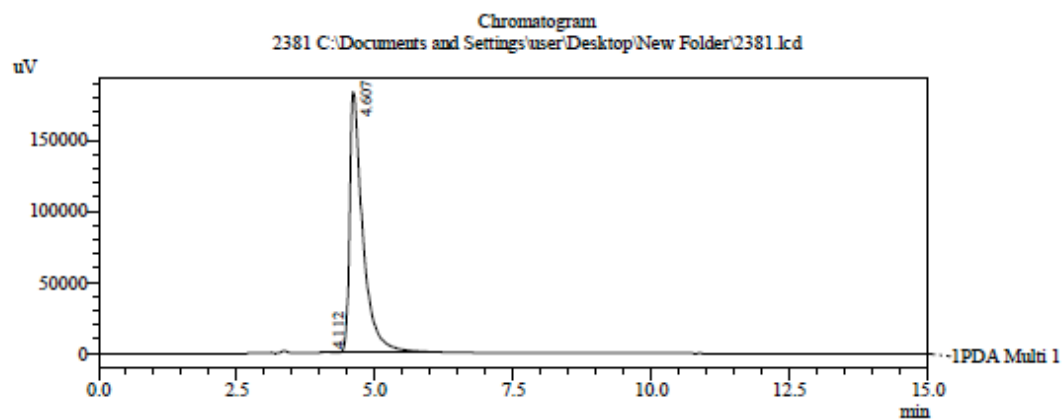

PeakTable

PDA Ch1 254nm 4nm

| Peak# | Ret. Time | Area    | Height | Area %  |
|-------|-----------|---------|--------|---------|
| 1     | 4.112     | 4778    | 557    | 0.156   |
| 2     | 4.607     | 3057485 | 183420 | 99.844  |
| Total |           | 3062262 | 183977 | 100.000 |

### S40. <sup>1</sup>H-NMR Spectrum of 6n

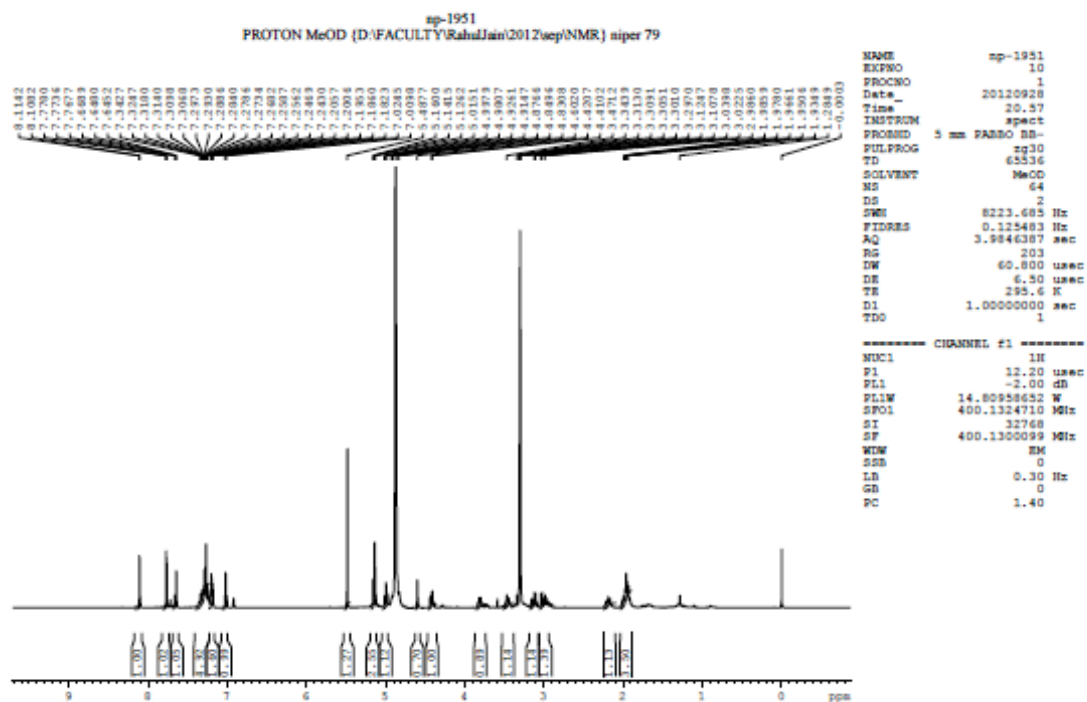

### S41. <sup>13</sup>C-NMR Spectrum of 6n

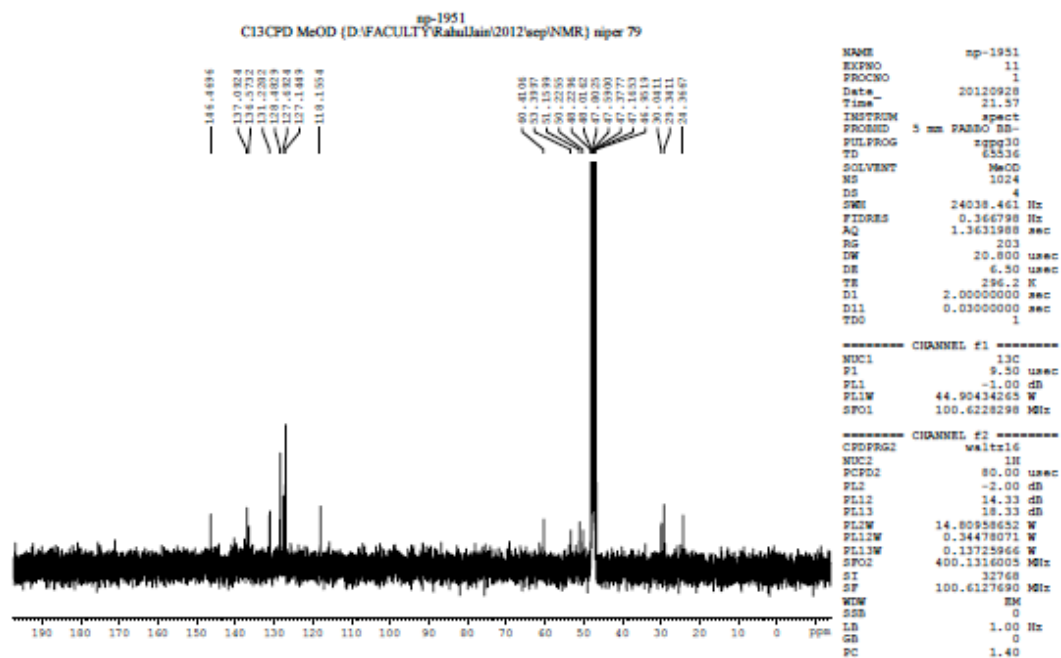

## S42. HRMS Spectrum of 6n

# NIPER

### Sample Information

Acquired by : Chhuttan L. Meena  
Sample Name : 2381  
Sample ID : 2381  
Tray# : 1  
Vial# : 19  
Injection Volume : 10 uL  
Data Filename : 2381.lcd  
Method Filename : 70%-B-PLOT-15 MIN.lcm  
Batch Filename : 30.9.12B9.lcb  
Report Filename : sunil C-18.lcr  
Date Acquired : 10/1/2012 5:39:26 AM  
Data Processed : 10/1/2012 2:00:37 PM  
Column : RP-18  
Flow Rate : 1.0 mL/min

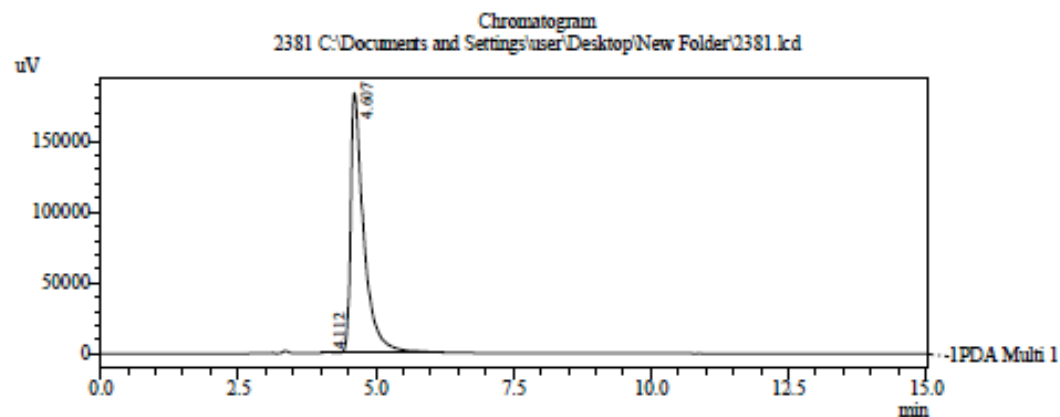

PeakTable

PDA Ch1 254nm 4nm

| Peak# | Ret. Time | Area    | Height | Area %  |
|-------|-----------|---------|--------|---------|
| 1     | 4.112     | 4778    | 557    | 0.156   |
| 2     | 4.607     | 3057485 | 183420 | 99.844  |
| Total |           | 3062262 | 183977 | 100.000 |

### S43. <sup>1</sup>H-NMR Spectrum of 60

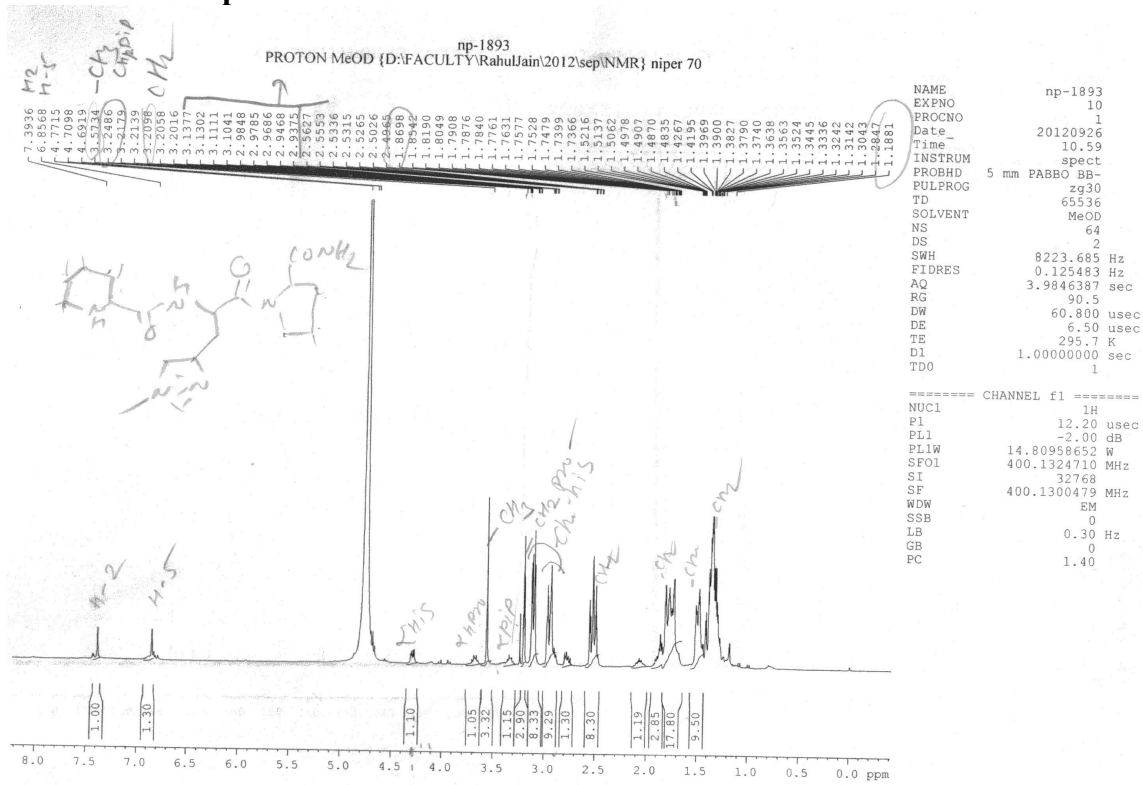

### S44. <sup>13</sup>C-NMR Spectrum of 60

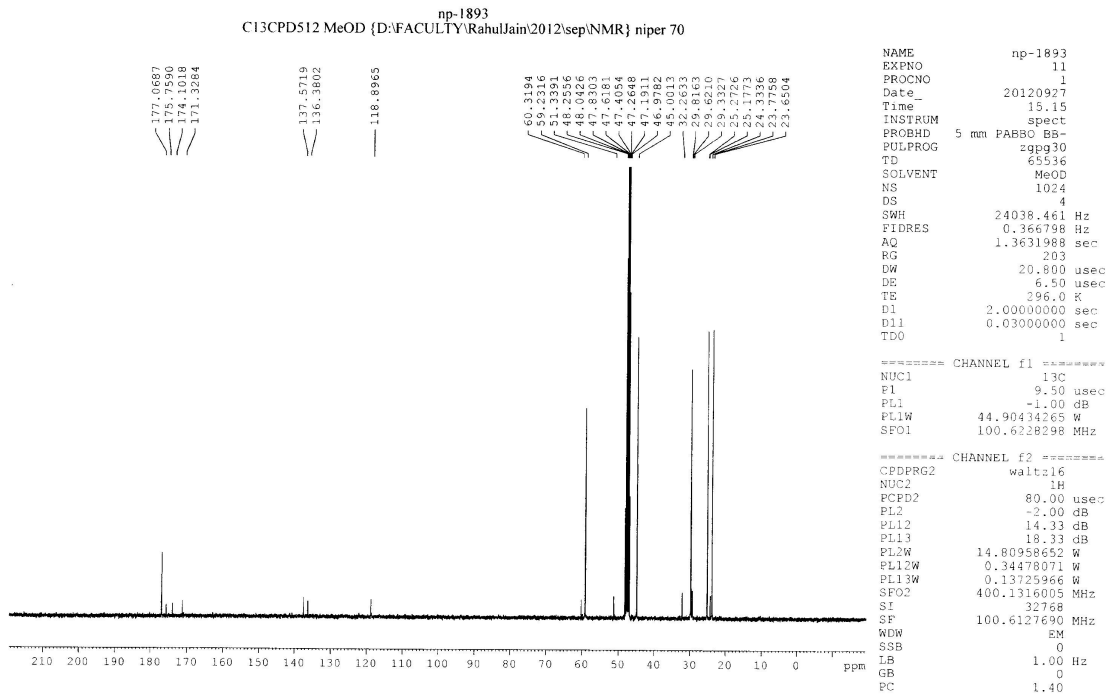

S45. HPLC chromatogram of 6o

# NIPER

Sample Information

Acquired by : CLM  
 Sample Name : 1893  
 Sample ID : 1893  
 Tray# : 1  
 Vial# : 29  
 Injection Volume : 10 uL  
 Data Filename : 1893.lcd  
 Method Filename : 70%-B-PLOT-15 MIN.lcm  
 Batch Filename : 30.9.12B9.lcb  
 Report Filename : sunil C-18.lcr  
 Date Acquired : 10/1/2012 8:14:41 AM  
 Data Processed : 10/1/2012 12:16:08 PM  
 Column : RP-18  
 Flow Rate : 1.0 mL/min

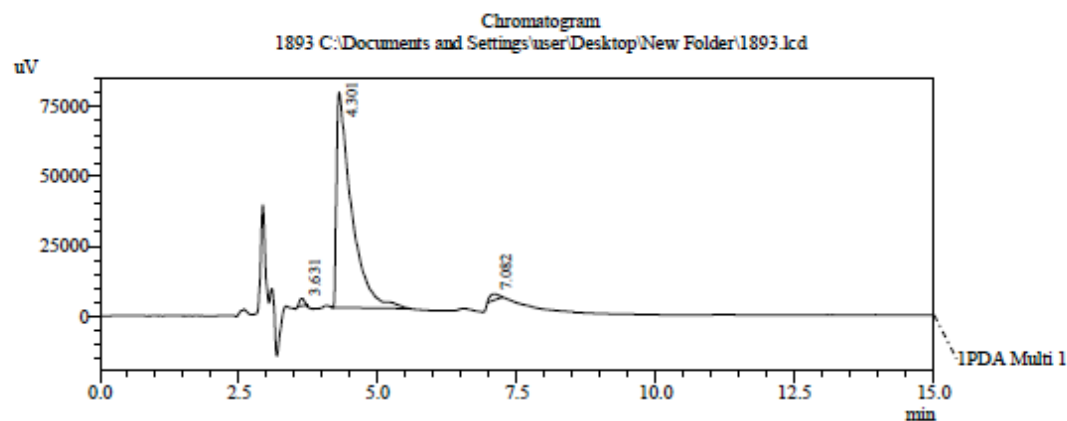

PeakTable

PDA Ch1 215nm 4nm

| Peak# | Ret. Time | Area    | Height | Area %  |
|-------|-----------|---------|--------|---------|
| 1     | 3.631     | 14680   | 2599   | 0.990   |
| 2     | 4.301     | 1444351 | 77022  | 97.380  |
| 3     | 7.082     | 24185   | 2189   | 1.631   |
| Total |           | 1483216 | 81809  | 100.000 |

### S46. <sup>1</sup>H-NMR Spectrum of 6p

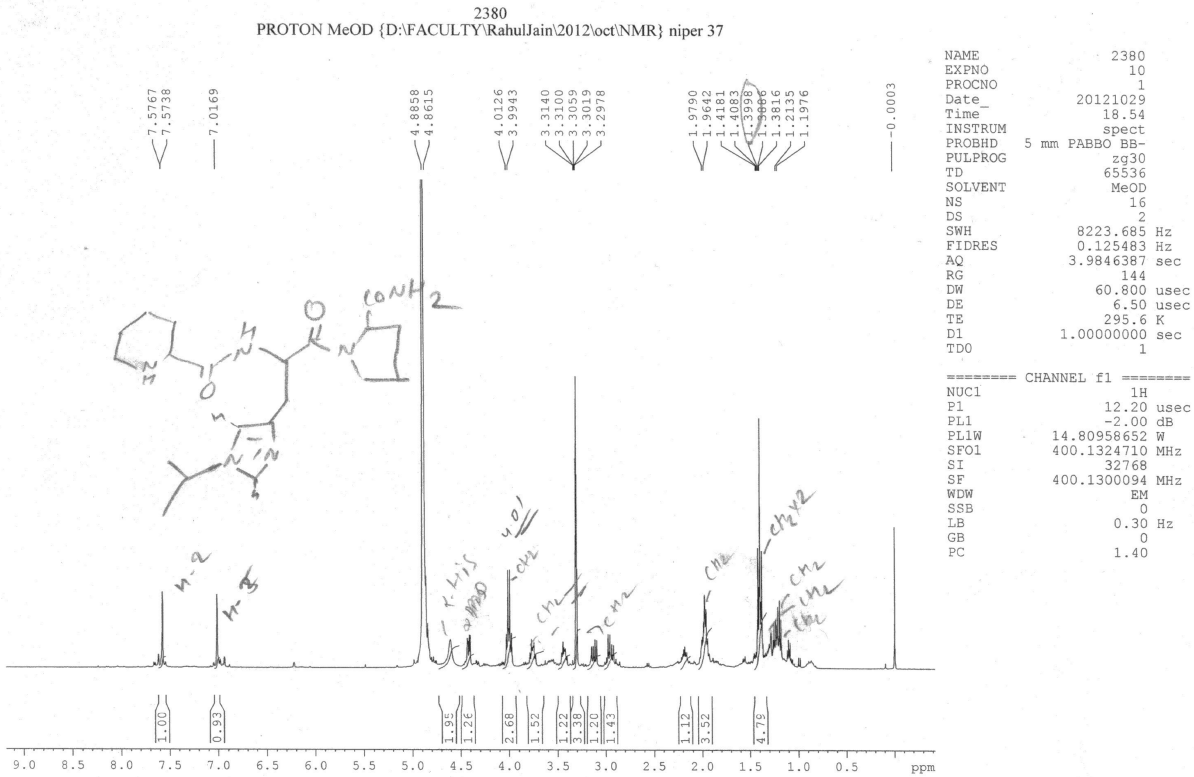

### S47. <sup>13</sup>C-NMR Spectrum of 6p

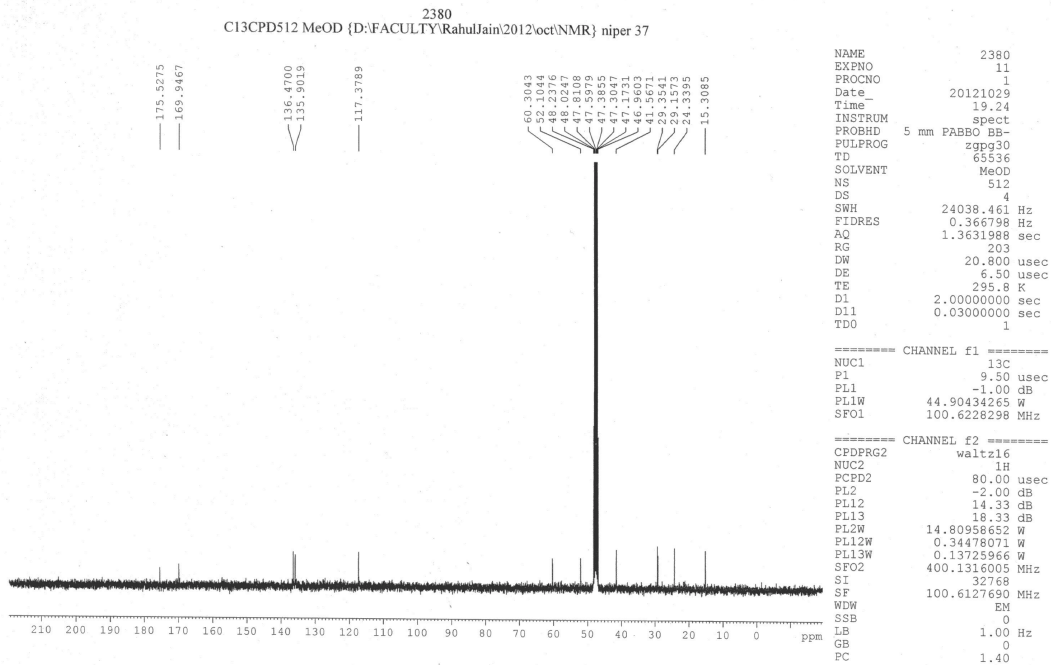

## S48. HPLC chromatogram of 6p

# NIPER

### Sample Information

Acquired by : chhuttan  
 Sample Name : 2380  
 Sample ID : 2380  
 Tray# : 1  
 Vial# : 21  
 Injection Volume : 10 uL  
 Data Filename : 2380.lcd  
 Method Filename : 70%-B-PLOT-15 MIN.lcm  
 Batch Filename : 30.9.12B9.lcb  
 Report Filename : sunil C-18.lcr  
 Date Acquired : 10/1/2012 6:10:31 AM  
 Data Processed : 10/1/2012 1:59:55 PM  
 Column : RP-18  
 Flow Rate : 1.0 mL/min

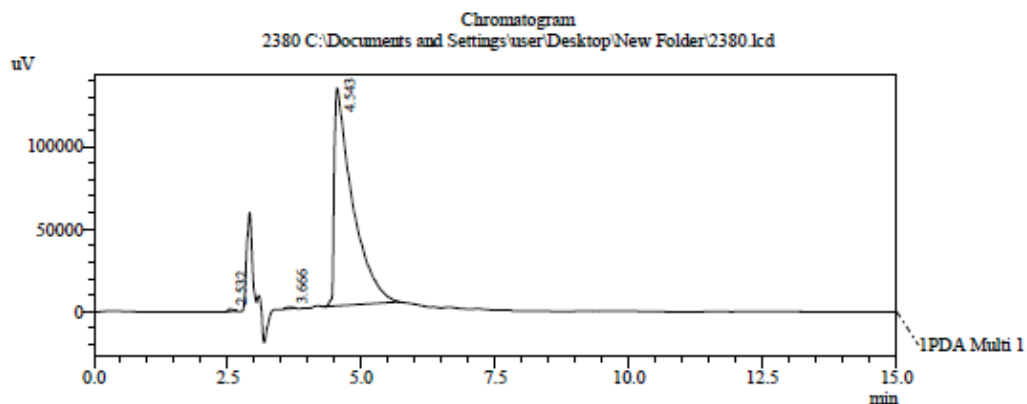

PeakTable

PDA Ch1 215nm 4nm

| Peak# | Ret. Time | Area    | Height | Area %  |
|-------|-----------|---------|--------|---------|
| 1     | 2.532     | 7695    | 1460   | 0.245   |
| 2     | 3.666     | 6355    | 926    | 0.203   |
| 3     | 4.543     | 3121568 | 131990 | 99.552  |
| Total |           | 3135618 | 134376 | 100.000 |

### S49. <sup>1</sup>H-NMR Spectrum of 6q

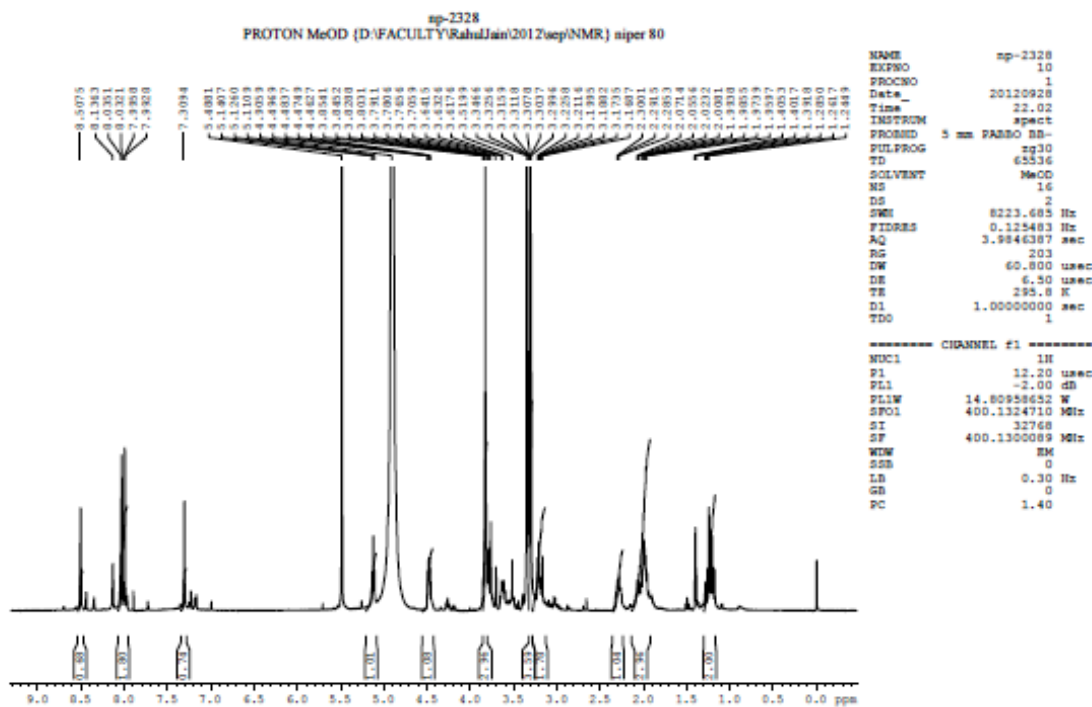

### S50. <sup>13</sup>C-NMR Spectrum of 6q

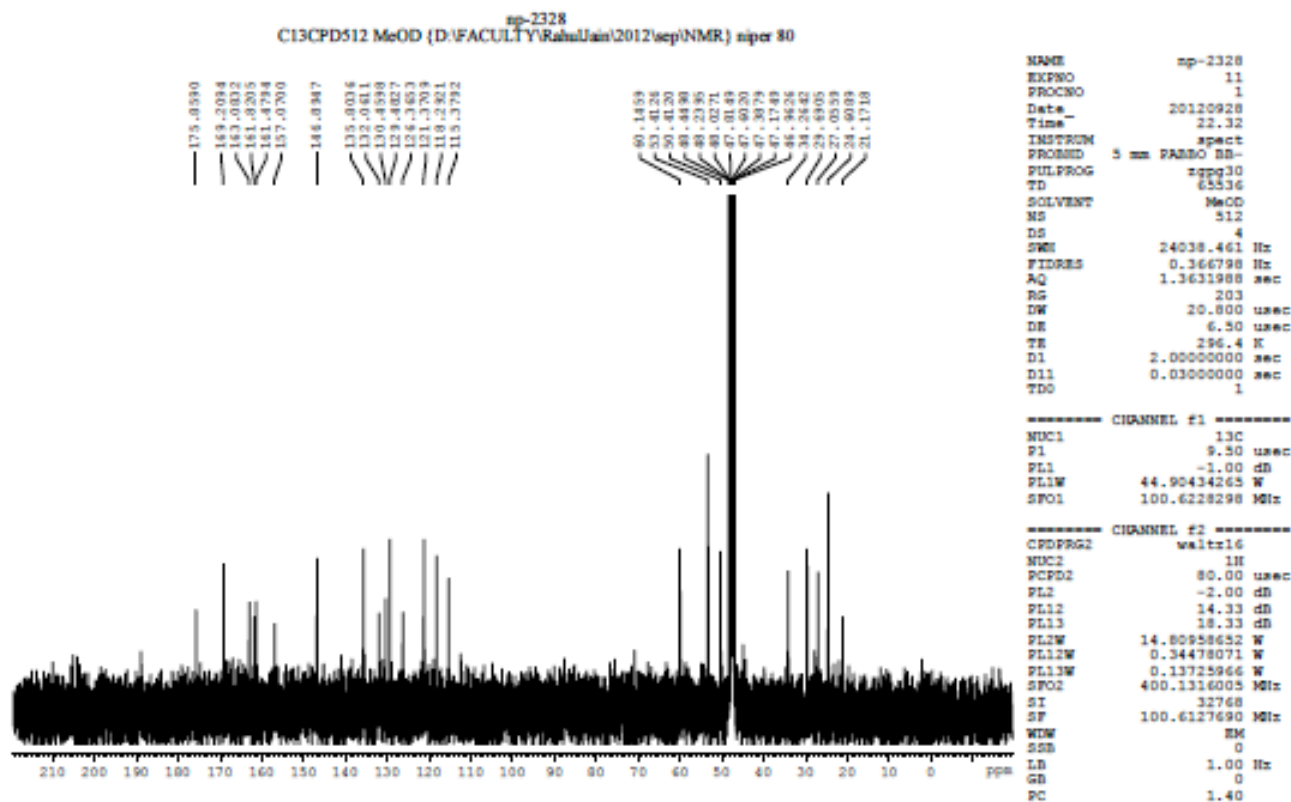



# S51.HPLC chromatogram of 6q

## NIPER

### Sample Information

Acquired by : Chhuttan L. Meena  
Sample Name : NP-2328  
Sample ID : NP-2328  
Tray# : 1  
Vial# : 5  
Injection Volume : 10 uL  
Data Filename : NP-2328.lcd  
Method Filename : 70%-B-PLOT-15 MIN.lcm  
Batch Filename : 30.9.12B9.lcb  
Report Filename : sunil C-18.lcr  
Date Acquired : 10/1/2012 2:02:11 AM  
Data Processed : 10/1/2012 2:16:32 PM  
Column : RP-18  
Flow Rate : 1.0 mL/min

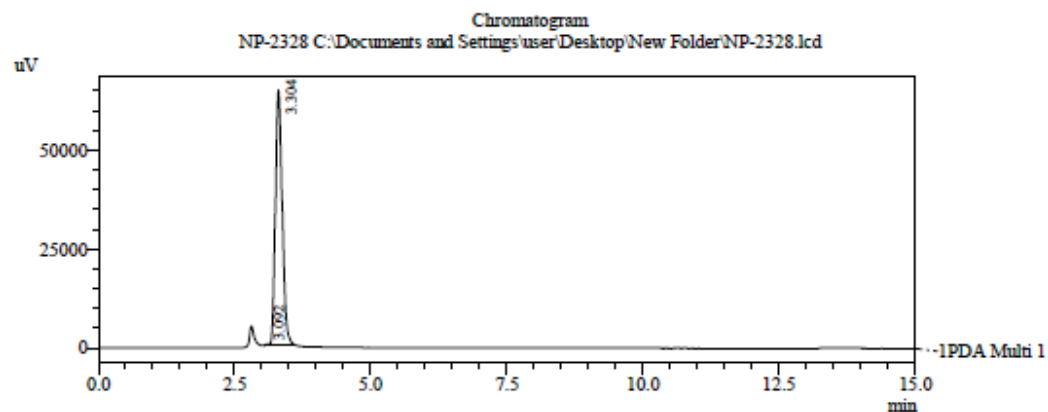

PeakTable

PDA Ch1 254nm 4nm

| Peak# | Ret. Time | Area   | Height | Area %  |
|-------|-----------|--------|--------|---------|
| 1     | 3.092     | 424    | 141    | 0.076   |
| 2     | 3.304     | 559879 | 64130  | 99.924  |
| Total |           | 560303 | 64270  | 100.000 |

### S52. <sup>1</sup>H NMR Spectrum of 6r

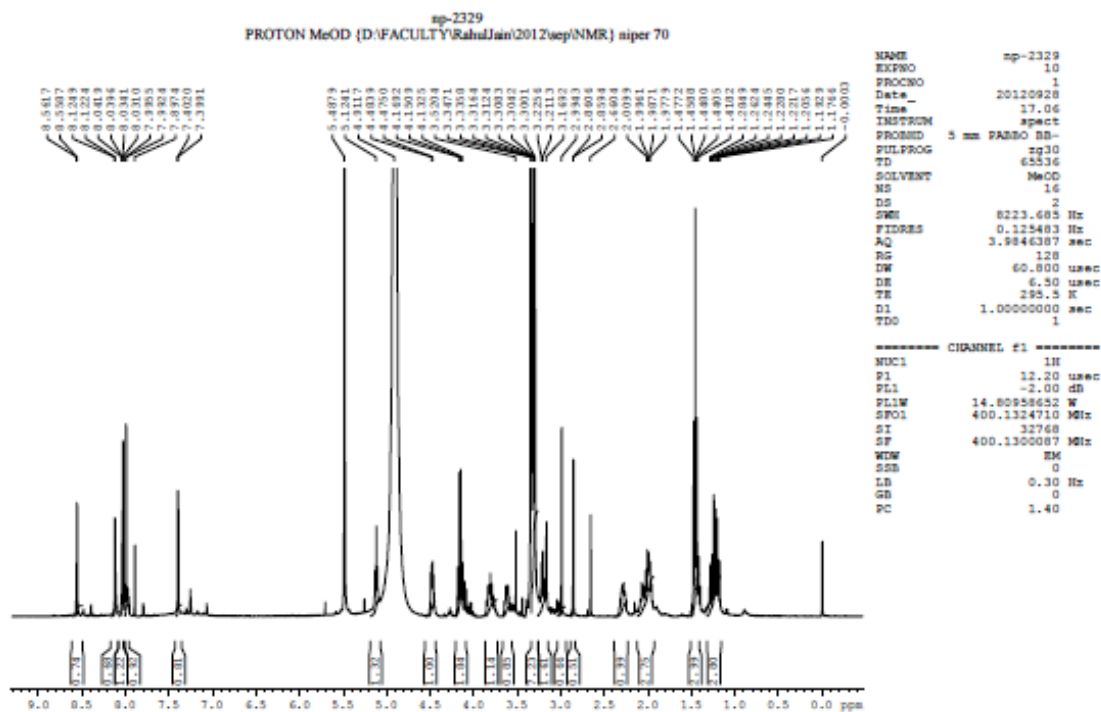

### S53. <sup>13</sup>C-NMR Spectrum of 6r

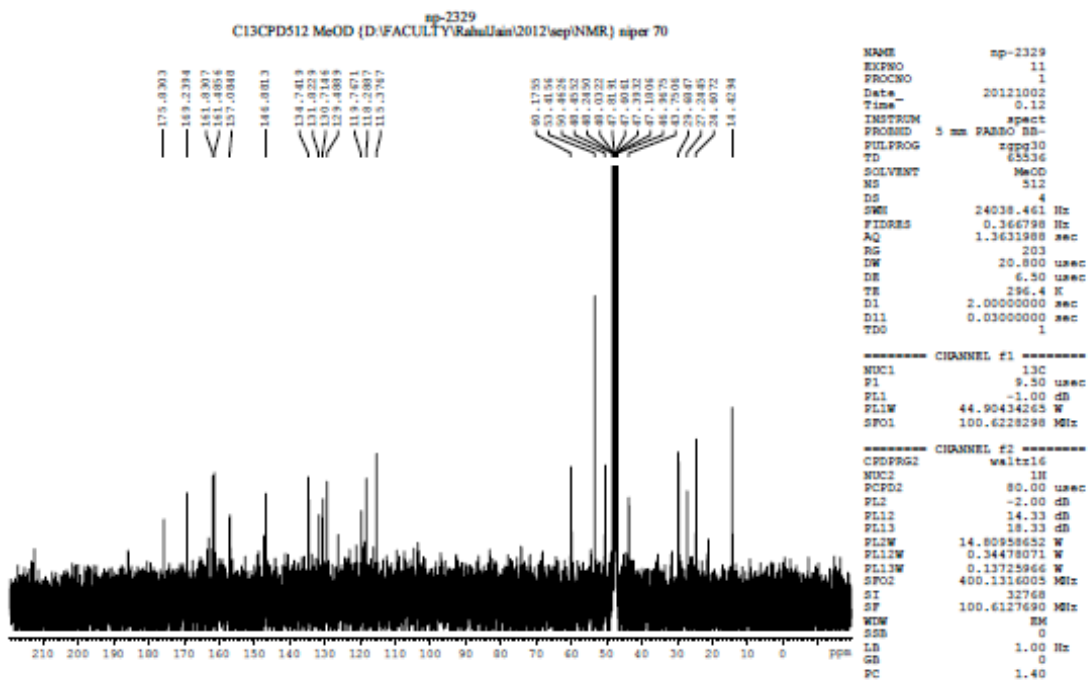

## S54. HPLC chromatogram of 6r

# NIPER

### Sample Information

Acquired by : Chhuttan L. Meena  
Sample Name : NP-2328  
Sample ID : NP-2328  
Tray# : 1  
Vial# : 5  
Injection Volume : 10 uL  
Data Filename : NP-2328.lcd  
Method Filename : 70%-B-PLOT-15 MIN.lcm  
Batch Filename : 30.9.12B9.lcb  
Report Filename : sumil C-18.lcr  
Date Acquired : 10/1/2012 2:02:11 AM  
Data Processed : 10/1/2012 2:16:32 PM  
Column : RP-18  
Flow Rate : 1.0 mL/min

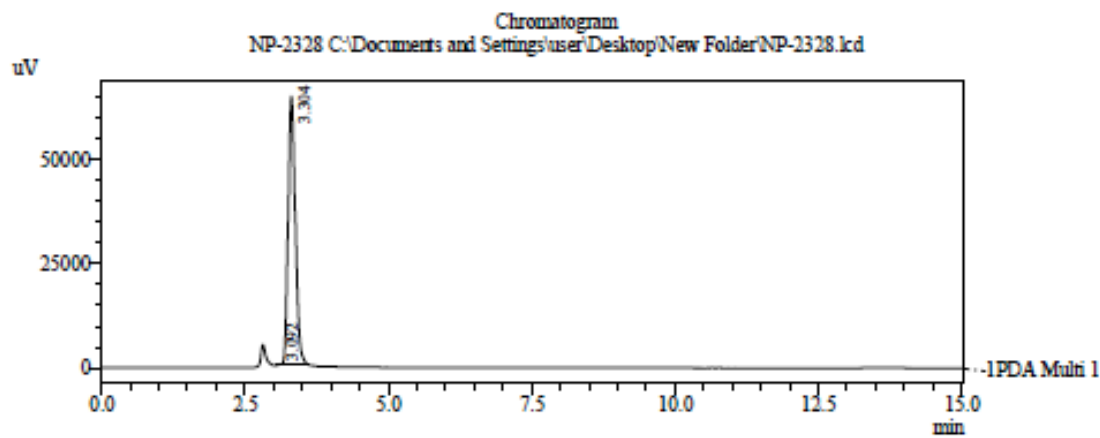

1 PDA Multi 1 / 254nm 4nm

PeakTable

PDA Ch1 254nm 4nm

| Peak# | Ret. Time | Area   | Height | Area %  |
|-------|-----------|--------|--------|---------|
| 1     | 3.092     | 424    | 141    | 0.076   |
| 2     | 3.304     | 559879 | 64130  | 99.924  |
| Total |           | 560303 | 64270  | 100.000 |

### S55. <sup>1</sup>H-NMR Spectrum of 6s

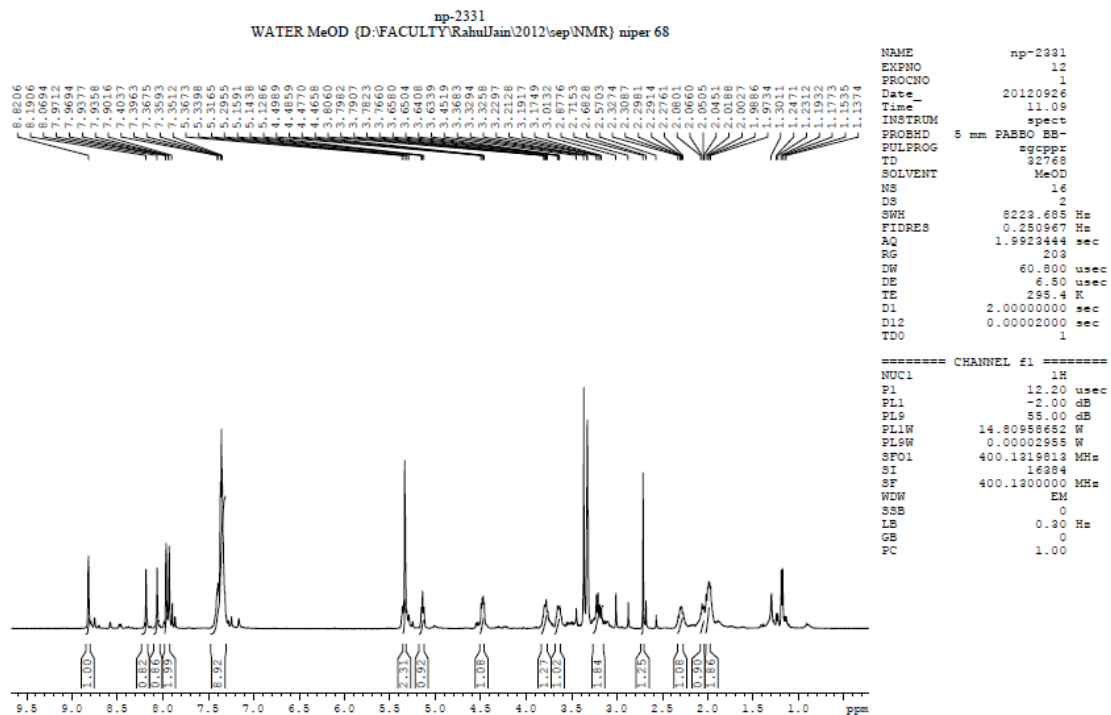

### S56. <sup>13</sup>C-NMR Spectrum of 6s

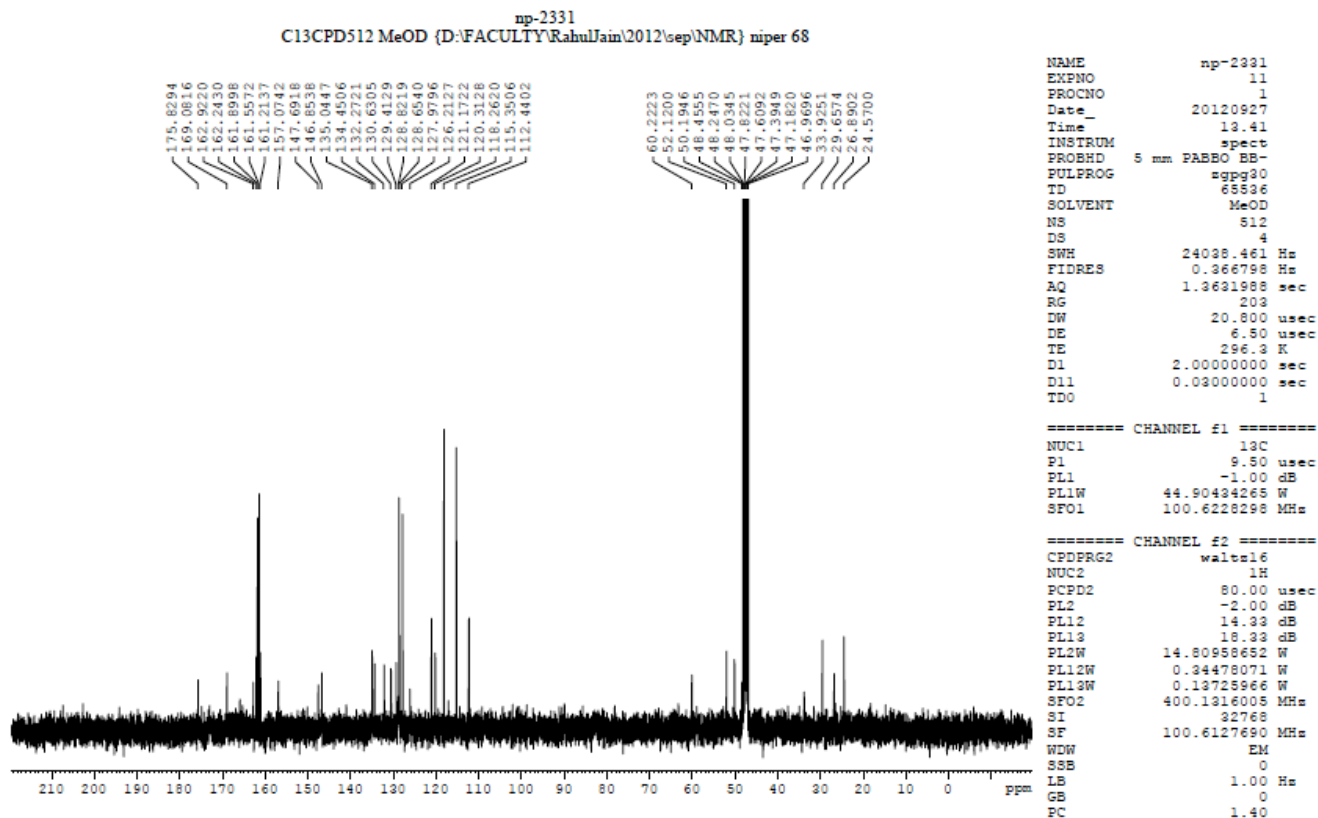

# S57.HPLCchromatogram of 6s

## NIPER

### Sample Information

Acquired by : Chhuttan L. meena  
 Sample Name : NP-2331  
 Sample ID : NP-2331  
 Tray# : 1  
 Vial# : 3  
 Injection Volume : 10 uL  
 Data Filename : NP-2331.lcd  
 Method Filename : 70%-B-PLOT-15 MIN.lcm  
 Batch Filename : 30.9.12B2.lcb  
 Report Filename : sunil C-18.lcr  
 Date Acquired : 9/30/2012 5:18:23 PM  
 Data Processed : 10/1/2012 2:17:27 PM  
 Column : RP-18  
 Flow Rate : 1.0 mL/min

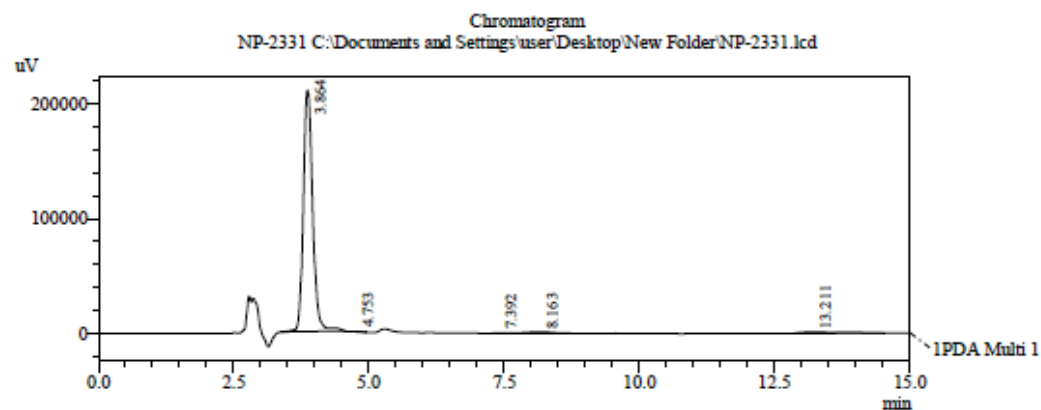

PeakTable

PDA Ch1 224nm 4nm

| Peak# | Ret. Time | Area    | Height | Area %  |
|-------|-----------|---------|--------|---------|
| 1     | 3.864     | 2534671 | 209669 | 95.546  |
| 2     | 4.753     | 5395    | 541    | 0.203   |
| 3     | 7.392     | 2766    | 132    | 0.104   |
| 4     | 8.163     | 46045   | 1415   | 1.736   |
| 5     | 13.211    | 63938   | 1156   | 2.410   |
| Total |           | 2652816 | 212913 | 100.000 |

# S58. <sup>1</sup>H-NMR Spectrum of 6t

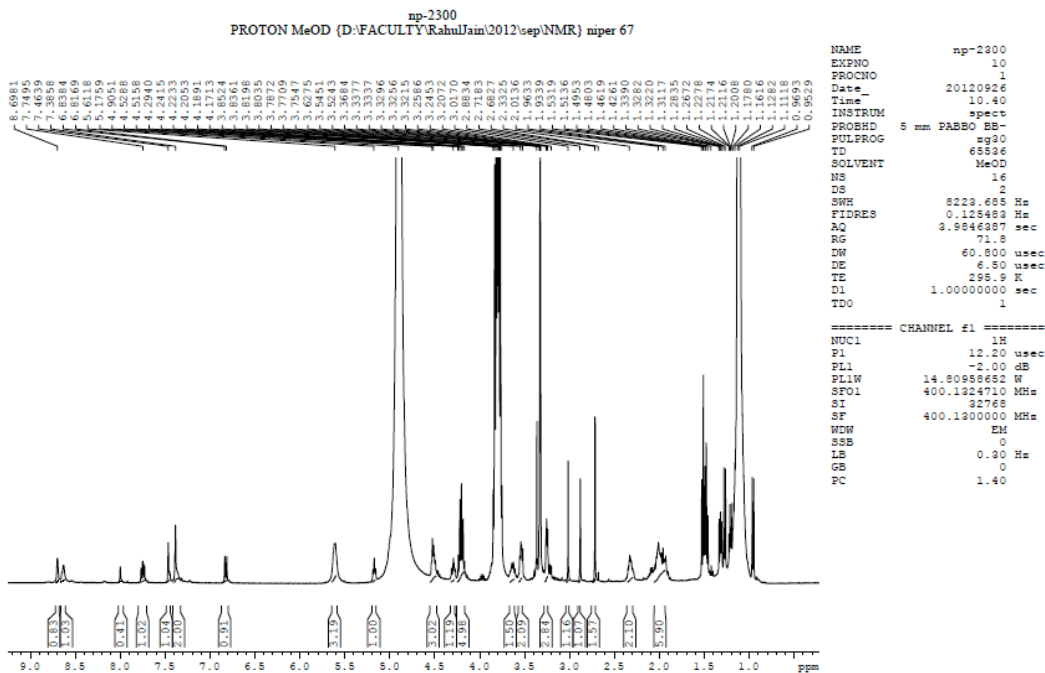

# S59. <sup>13</sup>C NMR spectrum of 6t

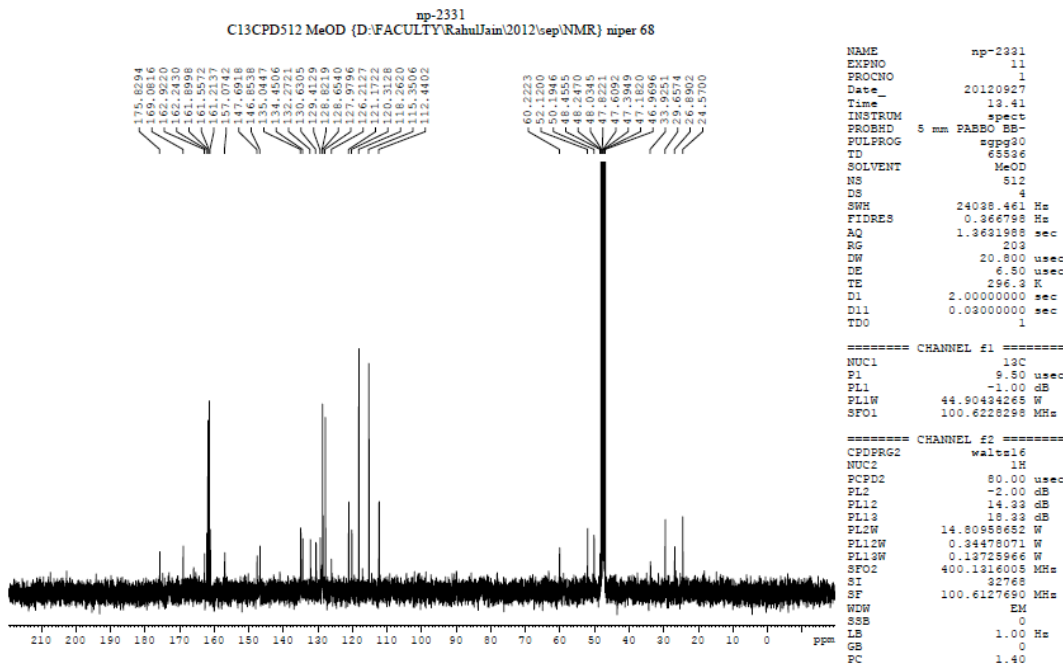

# S60.HPLC chromatogram of 6t

## NIPER

### Sample Information

Acquired by : Chhuttan L. meena  
Sample Name : NP-2300  
Sample ID : NP-2300  
Tray# : 1  
Vial# : 3  
Injection Volume : 10 uL  
Data Filename : NP-2300.lcd  
Method Filename : 70%-B-PLOT-15 MIN.lcm  
Batch Filename : 30.9.12.lcb  
Report Filename : sumil C-18.lcr  
Date Acquired : 9/30/2012 2:58:58 PM  
Data Processed : 10/1/2012 2:09:21 PM  
Column : RP-18  
Flow Rate : 1.0 mL/min

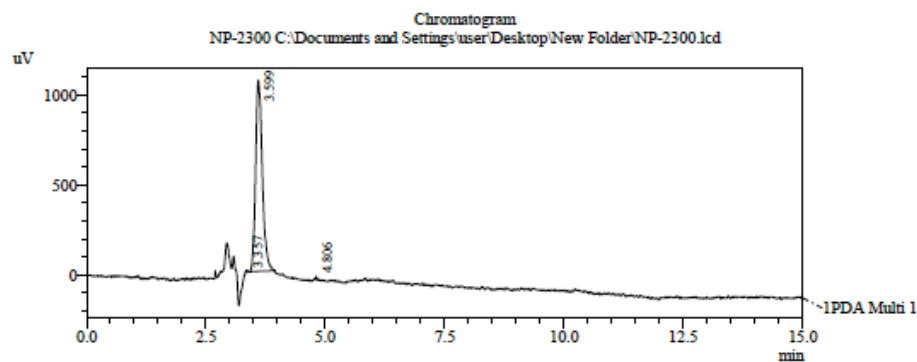

PeakTable

PDA Ch1 254nm 4nm

| Peak# | Ret. Time | Area  | Height | Area %  |
|-------|-----------|-------|--------|---------|
| 1     | 3.357     | 37    | 13     | 0.354   |
| 2     | 3.599     | 10385 | 1059   | 99.604  |
| 3     | 4.806     | 4     | 15     | 0.041   |
| Total |           | 10426 | 1087   | 100.000 |

## S61. <sup>1</sup>H NMR Spectrum of 6u

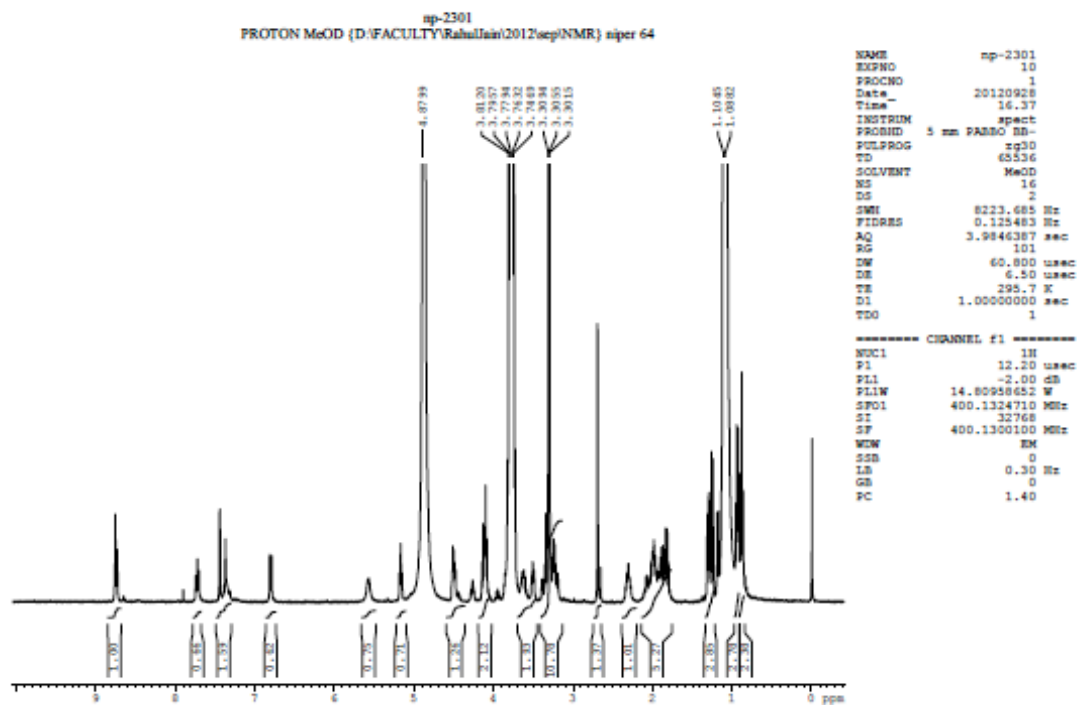

## S62. <sup>13</sup>C-NMR Spectrum of 6u

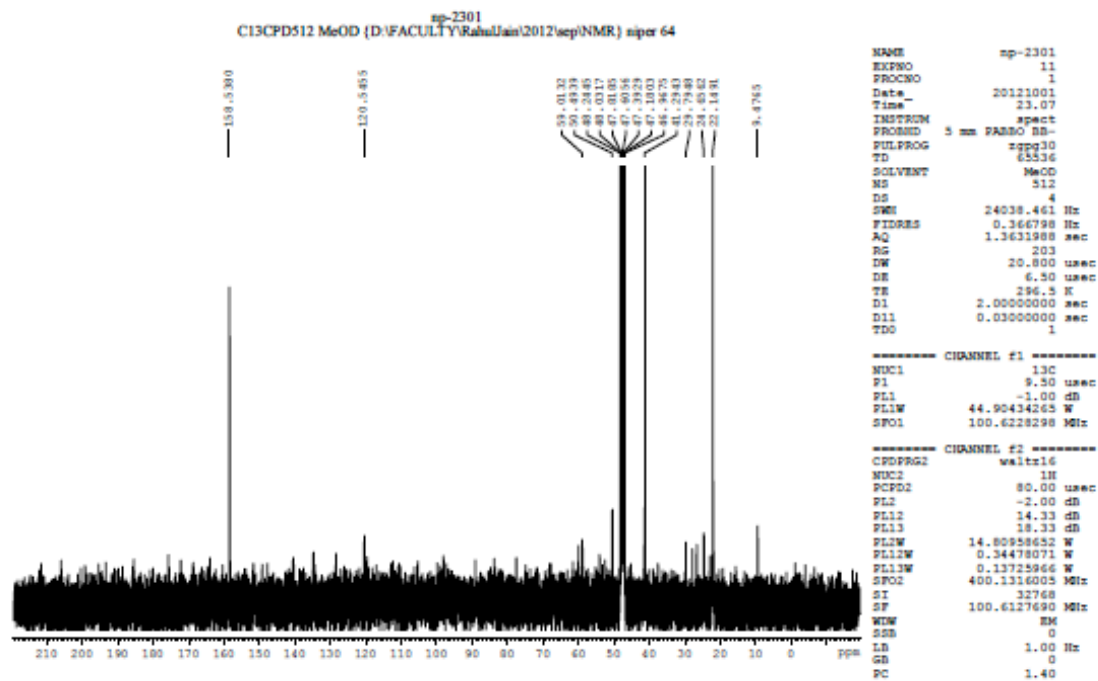



# S63.HPLC chromatogram of 6u

## NIPER

### Sample Information

Acquired by : Sunil  
Sample Name : 231  
Sample ID : 231  
Tray# : 1  
Vial# : 10  
Injection Volume : 10 uL  
Data Filename : 231.lcd  
Method Filename : 70%-B-PLOT-15 MIN.lcm  
Batch Filename : 30.9.12B9.lcb  
Report Filename : sunil C-18.lcr  
Date Acquired : 10/1/2012 3:19:45 AM  
Data Processed : 10/1/2012 12:26:47 PM  
Column : RP-18  
Flow Rate : 1.0 mL/min

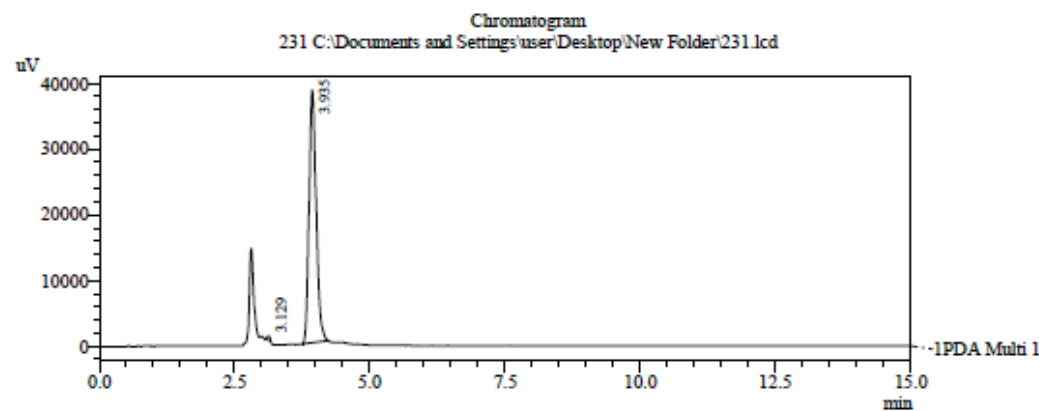

### PeakTable

PDA Ch1 254nm 4nm

| Peak# | Ret. Time | Area   | Height | Area %  |
|-------|-----------|--------|--------|---------|
| 1     | 3.129     | 1877   | 661    | 0.528   |
| 2     | 3.935     | 353696 | 38399  | 99.472  |
| Total |           | 355573 | 39060  | 100.000 |

# S64. <sup>1</sup>H-NMR Spectrum of 6v

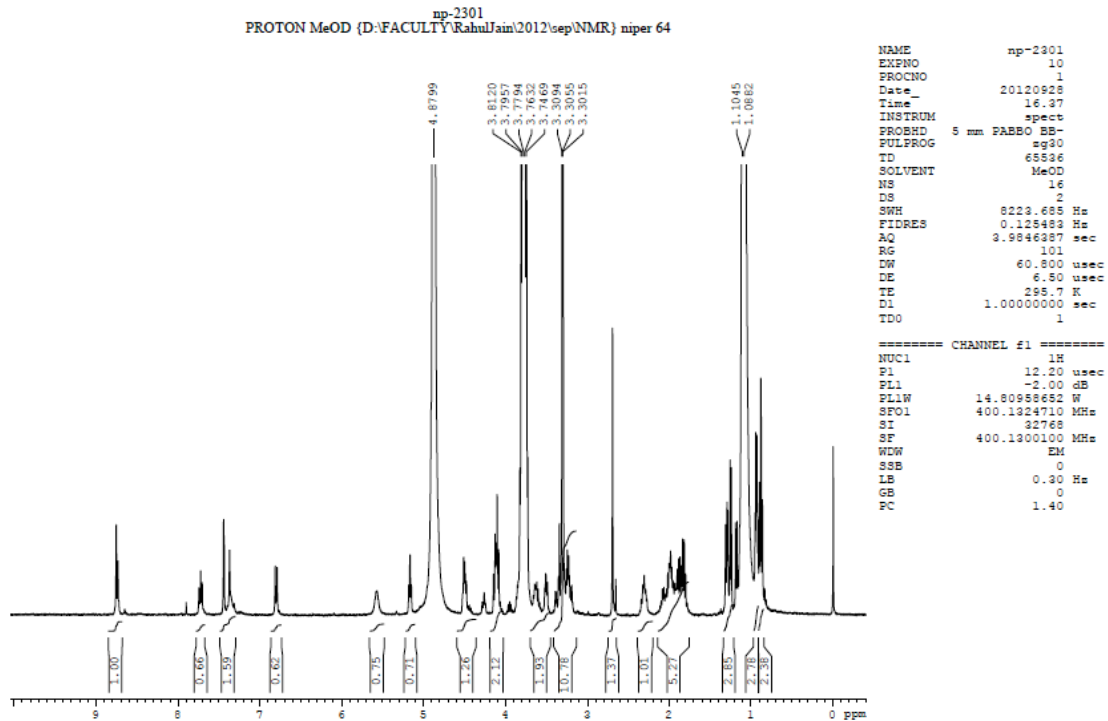

# S65. <sup>13</sup>C-NMR Spectrum of 6v

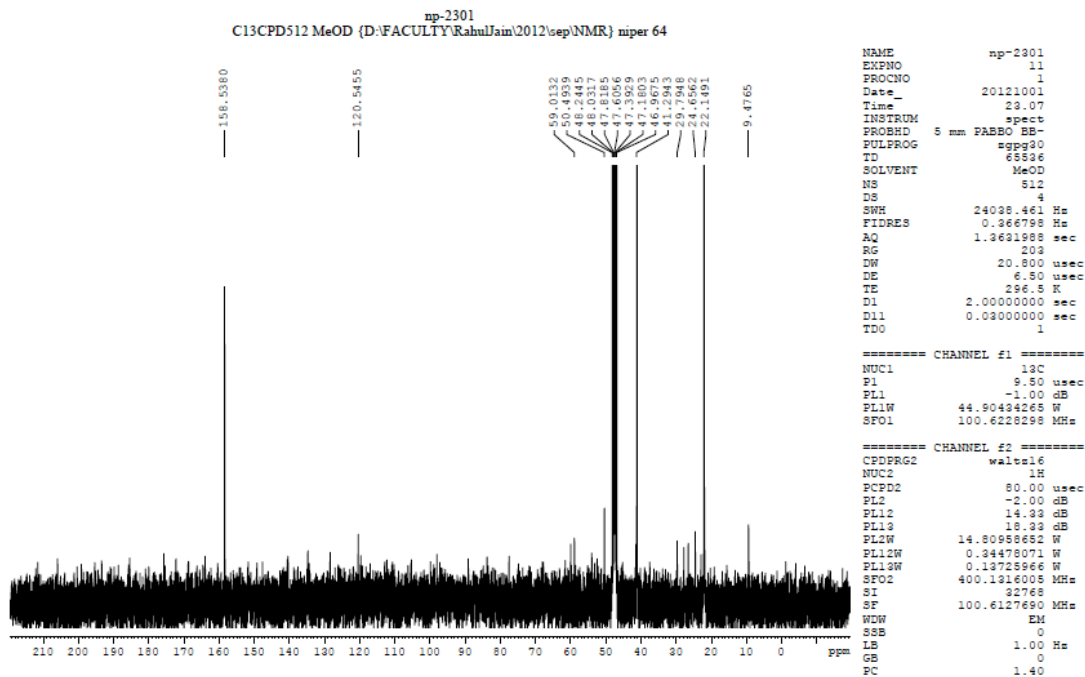

## Mass Spectrum List Report

**Analysis Info**

Analysis Name D:\Data\Rahul jain\12-09-01-NP-2301.d  
 Method sodium formate tune\_low.m  
 Sample Name NP-2301  
 Comment

Acquisition Date 9/3/2012 4:27:42 PM  
 Operator VIKAS GROVER  
 Instrument / Ser# maXis 40

**Acquisition Parameter**

|             |            |                       |           |                  |           |
|-------------|------------|-----------------------|-----------|------------------|-----------|
| Source Type | ESI        | Ion Polarity          | Positive  | Set Nebulizer    | 5.0 Bar   |
| Focus       | Not active | Set Capillary         | 4500 V    | Set Dry Heater   | 180 °C    |
| Scan Begin  | 50 m/z     | Set End Plate Offset  | -500 V    | Set Dry Gas      | 5.0 l/min |
| Scan End    | 500 m/z    | Set Collision Cell RF | 300.0 Vpp | Set Divert Valve | Source    |

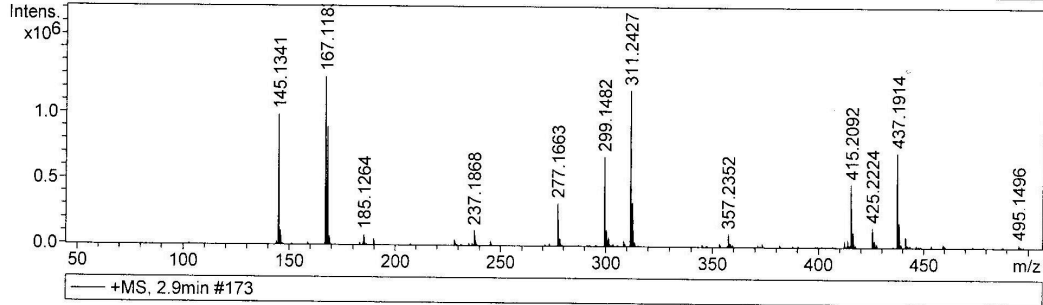

| #  | m/z      | Res.  | S/N    | I       | FWHM   |
|----|----------|-------|--------|---------|--------|
| 1  | 145.1341 | 14803 | 4995.9 | 984187  | 0.0098 |
| 2  | 146.1370 | 16786 | 538.3  | 108085  | 0.0087 |
| 3  | 167.1183 | 7229  | 6887.6 | 1274659 | 0.0231 |
| 4  | 185.1264 | 19527 | 569.2  | 79399   | 0.0095 |
| 5  | 237.1868 | 20251 | 906.1  | 115816  | 0.0117 |
| 6  | 277.1663 | 20332 | 2177.8 | 325200  | 0.0136 |
| 7  | 299.1482 | 19283 | 2229.4 | 678424  | 0.0155 |
| 8  | 311.2427 | 16261 | 3843.8 | 1179791 | 0.0191 |
| 9  | 357.2352 | 21936 | 695.8  | 96993   | 0.0163 |
| 10 | 415.2092 | 21543 | 1923.7 | 474503  | 0.0193 |
| 11 | 425.2224 | 21894 | 480.1  | 152147  | 0.0194 |
| 12 | 437.1914 | 21330 | 2570.5 | 719268  | 0.0205 |
| 13 | 495.1496 | 22730 | 232.0  | 30364   | 0.0218 |

# S67. <sup>1</sup>H-NMR Spectrum of 6w

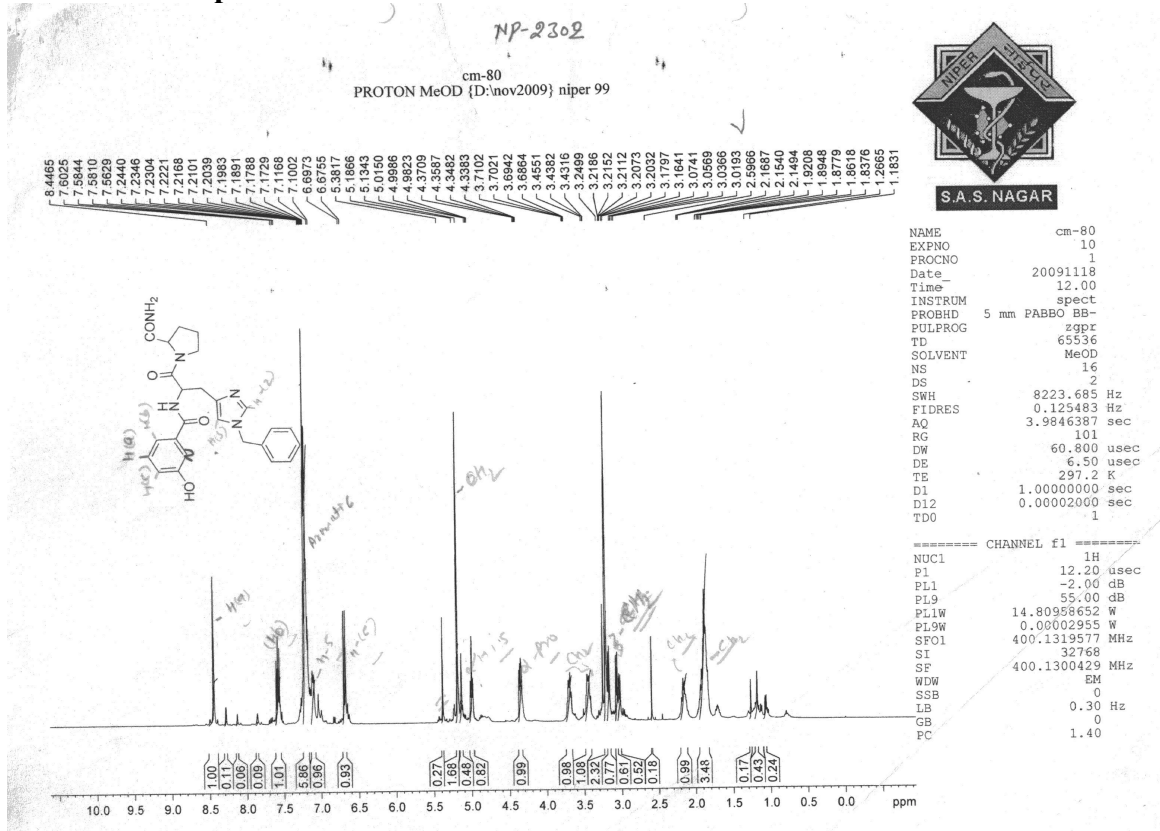

# S68. <sup>13</sup>C-NMR Spectrum of 6w

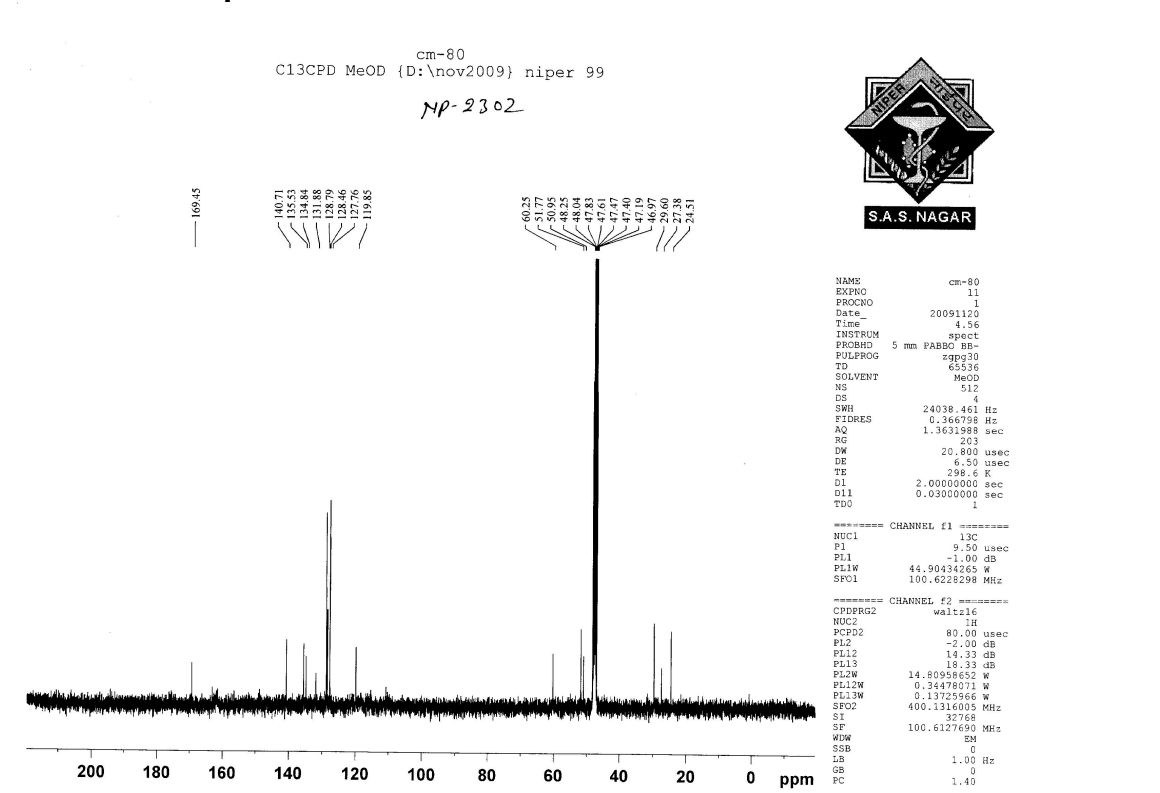

# S69.HPLC chromatogram of 6w

## NIPER

### Sample Information

Acquired by : Sumil  
 Sample Name : 2302  
 Sample ID : 2302  
 Tray# : 1  
 Vial# : 27  
 Injection Volume : 10 uL  
 Data Filename : 2302  
 Method Filename : 70%-B-PLOT-15 MIN.lcm  
 Batch Filename : 30.9.12B9.lcb  
 Report Filename : sumil C-18.lcr  
 Date Acquired : 10/1/2012 7:43:40 AM  
 Data Processed : 10/1/2012 12:24:30 PM  
 Column : RP-18  
 Flow Rate : 1.0 mL/min

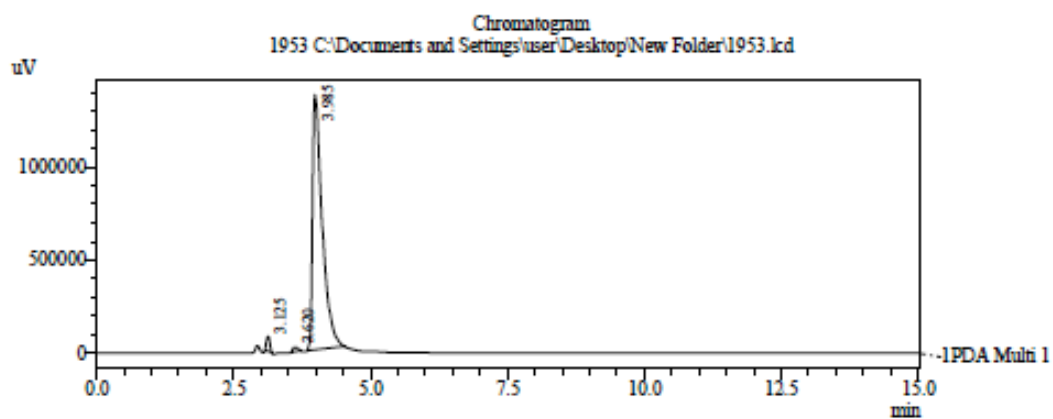

1 PDA Multi 1 / 215nm 4nm

### PeakTable

PDA Ch1 215nm 4nm

| Peak# | Ret. Time | Area     | Height  | Area %  |
|-------|-----------|----------|---------|---------|
| 1     | 3.125     | 312829   | 77103   | 1.817   |
| 2     | 3.620     | 137311   | 22999   | 0.797   |
| 3     | 3.985     | 16767615 | 1365261 | 97.386  |
| Total |           | 17217755 | 1465364 | 100.000 |

## S70. Receptor binding assay

### Material and methods

All of the synthesized peptides were examined for both their affinity for mTRH-R1 and mTRH-R2 and their ability to serve as agonists and their selectivity for the receptors. Twenty-four hours before the experiment (human embryonic kidney cells 293) HEK293 cells stably expressing mTRH-R1 or mTRH-R2, were plated in appropriate cell culture plate 24 well plates. 300,000 Cells per well were seeded and incubated overnight at 37°C. The following day, the cell monolayer was washed 3 times and the plate and buffer were placed on ice for at least 45 min prior the experiment. The plates were kept at 0-4°C and washed once with 1 mL/well of ice cold Hank's Balanced Salt Solution (HBSS) and with 10mM 4-(2-hydroxyethyl)-1-piperazineethanesulfonic acid (HEPES) without disturbing the cell monolayer. The compounds were added and mixed with [<sup>3</sup>H]-1-MeTRH (100 μL), TRH analogues (250 μL) at 4 °C before adding in plate (cold), all three-fold dilution in a single well totaling 350 μL (in duplicate). The plates were kept in the cold room in an ice tray up to 4 h and then the supernatant was aspirated and cells were carefully washed three times by adding 1 mL ice cold buffer per well (without disturbing monolayer of cells). 0.4-N NaOH solution (1 mL) was added to it and shaken for 30 min on the shaking platform for cell lysis. In small scintillation vial, 4 mL of scintillation fluids was taken and dispensed with 0.7 mL of lysate. It was shaken using a vortex mixer for 5 sec and placed in the scintillation counter. Affinities, reported as IC<sub>50</sub> (μM), were determined as described earlier; briefly by measuring the concentration of the peptides required to displace 50% of 4nM [<sup>3</sup>H]-1-MeTRH from the mTRH receptor.

### S71. Material and method of FLIPR assay

HEK293 cells stably expressing mTRH-R1 or mTRH-R2 were seeded in black-walled, clear-bottomed 96-well plates (Corning, NY) at a density of 6×10<sup>4</sup> cells/well in DMEM (10% FBS, 1% penicillin-streptomycin, 0.1% hygromycin) media and incubated for 24 h at 37°C and 6% CO<sub>2</sub>. On the following day, the culture media was replaced with 100 μL of HBSS supplemented with 20 mM HEPES, pH 7.5 and the cells were loaded with 100μL of calcium 3 fluorescent dye (Molecular Devices, Sunnyvale, CA) for 1 h at room temperature before addition of compounds. Transient changes in intracellular (Ca<sup>2+</sup>) induced by ligands were measured. Changes in fluorescence were detected at the emission wavelength of 515–575 nm using FLIPR calcium assay kit according to the manufacturer's recommendation. This kit includes a calcium sensitive dye that is taken into the cytoplasm of the cell during incubation. The kit masking technology remains outside the cell and blocks background fluorescence. Upon ligand binding to the receptor, calcium released into the cytoplasm of the cell, the dye binds to the intracellular calcium and becomes fluorescent; fluorescence is measured by the FLIPRTETRA<sup>®</sup> high throughput cellular screening system (Molecular Devices, Sunnyvale, CA). Data are reported as EC<sub>50</sub> (μM) values. All the results from receptor binding, FLIPR assays are discussed in Table 1.

### S72. Material and methods of *in vivo* reversal of pentobarbital-induced sleeping time assay

Antagonism of pentobarbital-induced sleeping time one of the best trends CNS effects of TRH is its analeptic action manifested by the decrease in barbiturate narcosis. TRH is an effective analeptic agent, which reduces pentobarbital-induced sleeping time by 50% or more following peripheral administration of high doses or central injection of lower doses in rats, rabbits, and monkeys. The all synthesized TRH-like peptides were evaluated *in vivo* by using the antagonism of a pentobarbital induced sleeping time model as described. TRH analogues were injected intravenously through the tail vein at a dose of 10

mmolkg<sup>-1</sup> (equivalent to 3.6 mgkg<sup>-1</sup> TRH). Ten minutes after administration of the synthesized peptides, each animal received 50 mgkg<sup>-1</sup> sodium pentobarbital intraperitoneally. The sleeping time was recorded as the time elapsed from the onset of loss of righting reflex until it returned (Table 2).

### **S73. Functional Observational Battery**

Functional Observational Battery is a systematic study performed to determine the effect of any disease or drug treatment on different functions of central nervous system/functions. This consists of measurement of various behavioral parameters in the home cage, hand held and open field cages. The scoring patterns are a modified form of Irwin's scoring (Hubler et al., 2005; Irwin, 1968). Various functional parameters, which were studied, are summarized in Table 4 and 5.

### **S74. Statistical analysis**

All the values are expressed as mean  $\pm$  S.E.M. Statistical analysis was performed using Sigma Stat 2.0 statistical software. Statistical significance for multi group was assessed by using one-way ANOVA followed by Dunnet test. Median was determined in FOB and statistical significance was assessed by Kruskal-Wallis One Way Analysis of Variance on Ranks followed by Dunnet test  $P < 0.05$  is considered as statistically significant.

Table 4 Effect of 6c (TRH 10  $\mu\text{mol/kg}$  i.v. and 10  $\mu\text{mol/kg}$  i.v.) on FOB parameters at different time interval

| Treatment<br>Parameters                                 | Saline          |                 |                  |                  |                  |                  | TRH 10 $\mu\text{mol/kg}$ |                  |                 |                  |                           |                   | 6c- 5 $\mu\text{mol/kg}$ i.v. |                  |                  |                  |                  |                 |
|---------------------------------------------------------|-----------------|-----------------|------------------|------------------|------------------|------------------|---------------------------|------------------|-----------------|------------------|---------------------------|-------------------|-------------------------------|------------------|------------------|------------------|------------------|-----------------|
|                                                         | 0<br>min        | 15<br>min       | 30<br>min        | 60<br>min        | 120<br>min       | 180<br>min       | 0<br>min                  | 15<br>min        | 30<br>min       | 60<br>min        | 120<br>min                | 180<br>min        | 0<br>min                      | 15<br>min        | 30<br>min        | 60<br>min        | 120<br>min       | 180<br>min      |
| <b>Home cage observation</b>                            |                 |                 |                  |                  |                  |                  |                           |                  |                 |                  |                           |                   |                               |                  |                  |                  |                  |                 |
| Spontaneous activity level                              | 3.0<br>(3,3)    | 2.5<br>(2,3)    | 3.0<br>(3,3)     | 2.5<br>(2,3)     | 3.0<br>(3,3)     | 2.5<br>(2,3)     | 3.0<br>(3,3)              | 2.5<br>(2,3)     | 3.0<br>(3,3)    | 2.5<br>(2,3)     | 3.0<br>(3,3)              | 2.5<br>(2,3)      | 3.0<br>(3,3)                  | 2.5<br>(2,3)     | 3.0<br>(3,3)     | 2.5<br>(2,3)     | 3.0<br>(3,3)     | 2.5<br>(2,3)    |
| <b>Home cage removal &amp; Handling</b>                 |                 |                 |                  |                  |                  |                  |                           |                  |                 |                  |                           |                   |                               |                  |                  |                  |                  |                 |
| Excitability/<br>handling<br>reactivity                 | 2.0<br>(2,2)    | 2.0<br>(2,2)    | 2.0<br>(2,2)     | 2.0<br>(2,2)     | 2.0<br>(2,2)     | 2.0<br>(2,2)     | 2.0<br>(2,2)              | 2.0<br>(2,2)     | 2.0<br>(2,2)    | 2.0<br>(2,2)     | 2.0<br>(2,2)              | 2.0<br>(2,2)      | 2.0<br>(2,2)                  | 2.0<br>(2,2)     | 2.0<br>(2,2)     | 2.0<br>(2,2)     | 2.0<br>(2,2)     | 2.0<br>(2,2)    |
| <b>Open field Observations (Neuromuscular activity)</b> |                 |                 |                  |                  |                  |                  |                           |                  |                 |                  |                           |                   |                               |                  |                  |                  |                  |                 |
| Landing hind limb foot splay (mm)                       | 39.3 $\pm$ 0.80 | 37.3 $\pm$ 0.67 | 37.16 $\pm$ 0.81 | 37.89 $\pm$ 0.98 | 35.27 $\pm$ 0.71 | 34.88 $\pm$ 0.83 | 42.61 $\pm$ 1.09          | 42.5 $\pm$ 10.3* | 39.6 $\pm$ 1.20 | 39.88 $\pm$ 0.78 | 38.0 $\pm$ 72 $\pm$ 1.04* | 38.72 $\pm$ 1.04* | 38.22 $\pm$ 0.80              | 35.61 $\pm$ 1.02 | 37.16 $\pm$ 0.81 | 35.77 $\pm$ 0.83 | 37.83 $\pm$ 1.14 | 35.0 $\pm$ 0.79 |
| <b>Open field Observation (Sensory response )</b>       |                 |                 |                  |                  |                  |                  |                           |                  |                 |                  |                           |                   |                               |                  |                  |                  |                  |                 |
| Spontaneous activity level (mm)                         | 4.0<br>(4,4)    | 4.0<br>(4,4)    | 4.0<br>(4,4)     | 3.5<br>(3,4)     | 4.0<br>(4,4)     | 4.0<br>(4,4)     | 4.5<br>(4,5)              | 4.0<br>(4,4)     | 4.0<br>(4,4)    | 4.0<br>(4,4)     | 3.5<br>(3,4)              | 3.5<br>(3,4)      | 4.5<br>(4,5)                  | 4.0<br>(4,4)     | 4.0<br>(4,4)     | 4.0<br>(4,4)     | 4.0<br>(4,4)     | 4.0<br>(4,4)    |
| Auditory response                                       | 3.0<br>(3,4)    | 3.0<br>(3,3)    | 3.0<br>(3,3)     | 3.0<br>(3,3)     | 3.0<br>(3,4)     | 3.0<br>(3,4)     | 4.0<br>(4,4)              | 3.5<br>(3,4)     | 3.5<br>(3,4)    | 3.0<br>(3,4)     | 3.5<br>(3,5)              | 3.5<br>(3,5)      | 4.0<br>(4,4)                  | 3.0<br>(3,4)     | 3.5<br>(3,4)     | 3.5<br>(3,4)     | 3.5<br>(3,4)     | 3.0<br>(3,4)    |
| Somatosensory response                                  | 3.0<br>(3,4)    | 3.0<br>(3,3)    | 3.0<br>(3,3)     | 3.0<br>(3,3)     | 4.0<br>(4,4)     | 3.5<br>(3,4)     | 4.0<br>(4,4)              | 4.0<br>(4,4)     | 4.0<br>(4,4)    | 4.0<br>(4,4)*    | 3.5<br>(3,4)              | 4.0<br>(4,4)      | 4.0<br>(4,4)                  | 4.0<br>(4,4)*    | 4.0<br>(4,4)*    | 4.0<br>(4,4)*    | 3.0<br>(3,3)*    | 3.0<br>(3,3)    |
| Visual approach                                         | 3.0<br>(3,3)    | 3.0<br>(3,3)    | 3.0<br>(2,3)     | 3.0<br>(3,3)     | 3.0<br>(3,3)     | 2.5<br>(2,3)     | 3.0<br>(3,3)              | 4.0<br>(4,4)     | 3.5<br>(3,4)    | 3.0<br>(3,4)     | 3.5<br>(3,4)              | 3.0<br>(3,3)      | 3.5<br>(3,4)                  | 4.0<br>(4,4)     | 3.5<br>(3,4)     | 3.5<br>(3,4)     | 3.0<br>(3,3)     | 3.0<br>(3,3)    |
| Olfactory response                                      | 3.0<br>(3,3)    | 3.0<br>(3,3)    | 3.0<br>(2,3)     | 3.0<br>(3,3)     | 3.0<br>(3,3)     | 2.5<br>(2,3)     | 3.0<br>(3,3)              | 3.0<br>(3,4)     | 3.5<br>(3,4)    | 3.0<br>(3,4)     | 3.0<br>(3,4)              | 3.5(3,4)*         | 3.0<br>(3,4)                  | 3.0<br>(3,3)     | 3.0<br>(3,3)     | 3.0<br>(3,3)     | 3.0<br>(3,3)     | 3.0<br>(3,3)    |
| Arousal                                                 | 4.0<br>(4,4)    | 4.0<br>(3,4)    | 4.0<br>(4,4)     | 4.0<br>(4,4)     | 4.0<br>(4,4)     | 4.0<br>(4,4)     | 4.0<br>(4,4)              | 4.0<br>(3,4)     | 4.0<br>(4,4)    | 4.0<br>(4,4)     | 4.0<br>(4,4)              | 4.0<br>(4,4)      | 4.0<br>(3,4)                  | 4.0<br>(4,4)     | 4.0<br>(4,4)     | 4.0<br>(4,4)     | 4.0<br>(4,4)     | 4.0<br>(4,4)    |

Mice (6) were treated with saline or TRH/ Analogues and observed for 3 hrs. Values are expressed as average of medians of scores (25th, 75th percentile) except Landing hind limb foot splay (mean  $\pm$  SEM), \*  $p < 0.05$  vs saline using Kruskal-Wallis One Way ANOVA followed by Dunnet test.



Table 5 Effect of **6c** (TRH 10  $\mu\text{mol/kg}$  i.v. and 10  $\mu\text{mol/kg}$  i.v.) on FOB parameters at different time interval

| Treatment                                               | Saline          |                 |                  |                  |                  |                  | TRH 10 $\mu\text{mol/kg}$ |                  |                  |                                  |                  |                  | 6c- 20 $\mu\text{mol/kg}$ i.v. |                  |                  |                 |                  |                  |
|---------------------------------------------------------|-----------------|-----------------|------------------|------------------|------------------|------------------|---------------------------|------------------|------------------|----------------------------------|------------------|------------------|--------------------------------|------------------|------------------|-----------------|------------------|------------------|
| Parameters                                              | 0 min           | 15 min          | 30 min           | 60 min           | 120 min          | 180 min          | 0 min                     | 15 min           | 30 min           | 60 min                           | 120 min          | 180 min          | 0 min                          | 15 min           | 30 min           | 60 min          | 120 min          | 180 min          |
| <b>Home cage observation</b>                            |                 |                 |                  |                  |                  |                  |                           |                  |                  |                                  |                  |                  |                                |                  |                  |                 |                  |                  |
| Spontaneous activity level                              | 3.0<br>(3,3)    | 2.5<br>(2,3)    | 3.0<br>(3,3)     | 2.5<br>(2,3)     | 3.0<br>(3,3)     | 2.5<br>(2,3)     | 3.0<br>(3,3)              | 2.5<br>(2,3)     | 3.0<br>(3,3)     | 2.5<br>(2,3)                     | 3.0<br>(3,3)     | 2.5<br>(2,3)     | 3.0<br>(3,3)                   | 2.5<br>(2,3)     | 3.0<br>(2,3)     | 2.5<br>(3,3)    | 3.0<br>(3,3)     | 2.5<br>(3,3)     |
| <b>Home cage removal &amp; Handling</b>                 |                 |                 |                  |                  |                  |                  |                           |                  |                  |                                  |                  |                  |                                |                  |                  |                 |                  |                  |
| Excitability/handling reactivity                        | 2.0<br>(2,2)    | 2.0<br>(2,2)    | 2.0<br>(2,2)     | 2.0<br>(2,2)     | 2.0<br>(2,2)     | 2.0<br>(2,2)     | 2.0<br>(2,2)              | 2.0<br>(2,2)     | 2.0<br>(2,2)     | 2.0<br>(2,2)                     | 2.0<br>(2,2)     | 2.0<br>(2,2)     | 2.0<br>(2,2)                   | 2.0<br>(2,2)     | 2.0<br>(2,2)     | 2.0<br>(2,2)    | 2.0<br>(2,2)     | 2.0<br>(2,2)     |
| <b>Open field Observations (Neuromuscular activity)</b> |                 |                 |                  |                  |                  |                  |                           |                  |                  |                                  |                  |                  |                                |                  |                  |                 |                  |                  |
| Landing hind limb foot splay (mm)                       | 39.3 $\pm$ 0.80 | 37.3 $\pm$ 0.67 | 37.16 $\pm$ 0.81 | 37.89 $\pm$ 0.98 | 35.27 $\pm$ 0.71 | 34.88 $\pm$ 0.83 | 38.2 $\pm$ 0.80           | 34.88 $\pm$ 0.83 | 37.05 $\pm$ 1.23 | <b>33.88<math>\pm</math>0.6*</b> | 34.44 $\pm$ 0.97 | 38.72 $\pm$ 1.04 | 40.94 $\pm$ 1.07               | 38.05 $\pm$ 1.17 | 36.72 $\pm$ 1.28 | 37.5 $\pm$ 0.83 | 35.55 $\pm$ 0.65 | 36.11 $\pm$ 0.80 |
| <b>Stimulus response (Open field)</b>                   |                 |                 |                  |                  |                  |                  |                           |                  |                  |                                  |                  |                  |                                |                  |                  |                 |                  |                  |
| Landing hind limb foot splay (mm)                       | 4.0<br>(4,4)    | 4.0<br>(4,4)    | 4.0<br>(4,5)     | 3.5<br>(4,4)     | 4.0<br>(4,5)     | 4.0<br>(4,4)     | 4.5<br>(4,4)              | 4.0<br>(4,4)     | 4.0<br>(4,4)     | 4.0<br>(4,4)                     | 3.5<br>(4,4)     | 3.5<br>(4,4)     | 4.5<br>(4,4)                   | 4.0<br>(4,4)     | 4.0<br>(4,4)     | 4.0<br>(4,4)    | 4.0<br>(4,4)     | 4.0<br>(4,4)     |
| Spontaneous activity level                              | 3.0<br>(3,4)    | 3.0<br>(3,3)    | 3.0<br>(3,3)     | 3.0<br>(3,3)     | 3.0<br>(3,4)     | 3.0<br>(3,4)     | 4.0<br>(4,4)              | 3.5<br>(3,4)     | 3.5<br>(3,4)     | 3.0<br>(3,4)                     | 3.5<br>(3,5)     | 3.5<br>(3,5)     | 4.0<br>(4,4)                   | 3.0<br>(3,4)     | 3.5<br>(3,4)     | 3.5<br>(3,4)    | 3.5<br>(3,4)     | 3.5<br>(3,4)     |
| Somatosensory response                                  | 3.0<br>(3,4)    | 3.0<br>(3,3)    | 3.0<br>(3,3)     | 3.0<br>(3,3)     | 3.5<br>(4,4)     | 4.0<br>(3,4)     | 3.5<br>(4,4)              | 4.0<br>(4,4)     | 4.0<br>(4,4)     | 4.0<br>(4,4)                     | 3.5<br>(3,4)     | 4.0<br>(4,4)     | 4.0<br>(4,4)                   | 4.0<br>(4,4)*    | 4.0<br>(4,4)*    | 4.0<br>(4,4)*   | 3.0<br>(3,3)*    | 3.0<br>(3,3)     |
| Visual approach                                         | 3.0<br>(3,3)    | 4.0<br>(3,3)    | 3.5<br>(2,3)     | 3.0<br>(3,3)     | 3.5<br>(3,3)     | 3.0<br>(2,3)     | 3.5<br>(3,3)              | 4.0<br>(4,4)     | 3.5<br>(3,4)     | 3.5<br>(3,4)                     | 3.0<br>(3,4)     | 3.0<br>(3,3)     | 3.0<br>(3,4)                   | 3.0<br>(4,4)     | 3.0<br>(3,4)     | 3.0<br>(3,4)    | 3.0<br>(3,3)     | 2.5<br>(3,3)     |
| Olfactory response                                      | 3.0<br>(3,3)    | 3.0<br>(3,3)    | 3.0<br>(2,3)     | 3.0<br>(2,3)     | 3.0<br>(3,3)     | 2.5<br>(2,3)     | 3.0<br>(3,3)              | 3.0<br>(3,4)     | 3.5<br>(3,4)     | 3.0<br>(3,4)                     | 3.0<br>(3,4)     | 3.5<br>(3,4)     | 3.0<br>(3,4)                   | 3.0<br>(3,3)     | 3.0<br>(3,3)     | 3.0<br>(3,3)    | 3.0<br>(3,3)     | 3.0<br>(3,3)     |
| Arousal                                                 | 4.0<br>(4,4)    | 4.0<br>(3,4)    | 4.0<br>(4,4)     | 4.0<br>(4,4)     | 4.0<br>(4,4)     | 4.0<br>(4,4)     | 4.0<br>(4,4)              | 4.0<br>(3,4)     | 4.0<br>(4,4)     | 4.0<br>(4,4)                     | 4.0<br>(4,4)     | 4.0<br>(4,4)     | 4.0<br>(3,4)                   | 4.0<br>(4,4)     | 4.0<br>(4,4)     | 4.0<br>(4,4)    | 4.0<br>(4,4)     | 4.0<br>(4,4)     |

Mice (6) were treated with saline or TRH/ Analogues and observed for 3 hrs. Values are expressed as average of medians of scores (25th, 75th percentile) except Landing hind limb foot splay (mean  $\pm$  SEM), \*  $p < 0.05$  vs saline using Kruskal-Wallis One Way ANOVA followed by Dunnet test.
